# Supplementary material for: Diaryl-Pyrano-Chromenes Atropisomers: Stereodynamics and Conformational Studies
Source: MDPI journal article supplement (doi:10.3390/molecules28134915), 2023-06-22
Supplement: s1 [file s1]

## Supporting Information

### **Diaryl-pyrano-chromenes atropisomers: stereodynamics and conformational studies**

**Alessia Ciogli <sup>1,\*</sup>, Andrea Fochetti <sup>1</sup>, Andrea Sorato <sup>1</sup>, Giancarlo Fabrizi <sup>1</sup>, Nunzio Matera <sup>2</sup>, Andrea Mazzanti <sup>2</sup> and Michele Mancinelli <sup>2,\*</sup>**

<sup>1</sup> Department of Chemistry and Drug Technologies, Sapienza University of Rome, Piazzale Aldo Moro 5, 00185 Roma, Italy; andrea.fochetti@uniroma1.it (A.F.); andrea.sorato@uniroma1.it (A.S.); giancarlo.fabrizi@uniroma1.it (G.F.)

<sup>2</sup> Department of Industrial Chemistry "Toso Montanari", University of Bologna, Viale del Risorgimento 4, 40136 Bologna, Italy; nunzio.matera2@unibo.it (N.M.); andrea.mazzanti@unibo.it (A.M.)

\* Correspondence: alessia.ciogli@uniroma1.it (A.C.); michele.mancinelli@unibo.it (M.M.)

## Table of content

|                                             |         |
|---------------------------------------------|---------|
| Synthesis of compound 5 and its NMR Spectra | S2-S3   |
| Separation of compounds 1a and 2a           | S4      |
| Full characterization compound 1a           | S5-S7   |
| Full characterization compound 2a           | S8-S13  |
| Synthesis of compound 1b and 2b             | S14-S15 |
| Full characterization compound 1b           | S16-S26 |
| Full characterization compound 2b           | S27-S33 |
| MOs for compounds 1b and 2b                 | S34-S36 |
| DFT calculations                            | S37-S89 |

### 1. Synthesis of 1,3-bis((3-(2-methylnaphthalen-1-yl)prop-2-yn-1-yl)oxy)benzene (5)

In a 50 ml round bottom flask equipped with a magnetic stirring bar, resorcinol (144.8 mg, 1.3 mmol., 1 equiv.) was dissolved in DMF (6 mL) at room temperature. Then  $K_2CO_3$  (545 mg, 3.95 mmol., 3 equiv.) was added and after 15 minutes 1-(3-bromoprop-1-yn-1-yl)-2-methylnaphthalene (750 mg, 2.89 mmol., 2.2 equiv.) was added to the mixture. Reaction was monitored by TLC until disappearance of the starting material, then diluted with  $Et_2O$  and washed with  $NaHSO_4$  (x2) and brine (x2). The organic extract was dried over  $Na_2SO_4$  and concentrated under reduced pressure. The residue was purified by chromatography on  $SiO_2$  (25-40  $\mu m$ ), eluting with a 98/2 (v/v) *n*-hexane/ $AcOEt$  mixture to obtain 589.0 mg (97% yield) of 1,3-bis((3-(2-methylnaphthalen-1-yl)prop-2-yn-1-yl)oxy)benzene **5**.

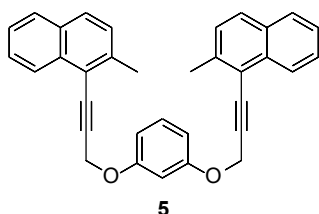

**5**: pale yellow solid; 97% yield;  $^1H$  NMR (400 MHz) ( $CDCl_3$ )  $\delta$  (ppm) 8.25 (d,  $J$  = 8.4 Hz, 2H), 7.79 (d,  $J$  = 8.1 Hz, 2H), 7.52 (t,  $J$  = 7.3 Hz, 2H), 7.42 (t,  $J$  = 7.5 Hz, 2H), 7.36 – 7.28 (m, 3H), 6.97 (m, 1H), 6.84 (dd,  $J_1$  = 8.2 Hz,  $J_2$  = 2.2 Hz, 2H), 5.17 (s, 4H), 2.60 (s, 6H);  $^{13}C\{^1H\}$  NMR (100.6 MHz) ( $CDCl_3$ )  $\delta$  (ppm) 159.0, 139.8, 133.7, 131.4, 130.0, 128.5, 128.0, 127.9, 126.9, 125.8, 125.5, 118.3, 108.3, 103.2, 57.0, 21.3.

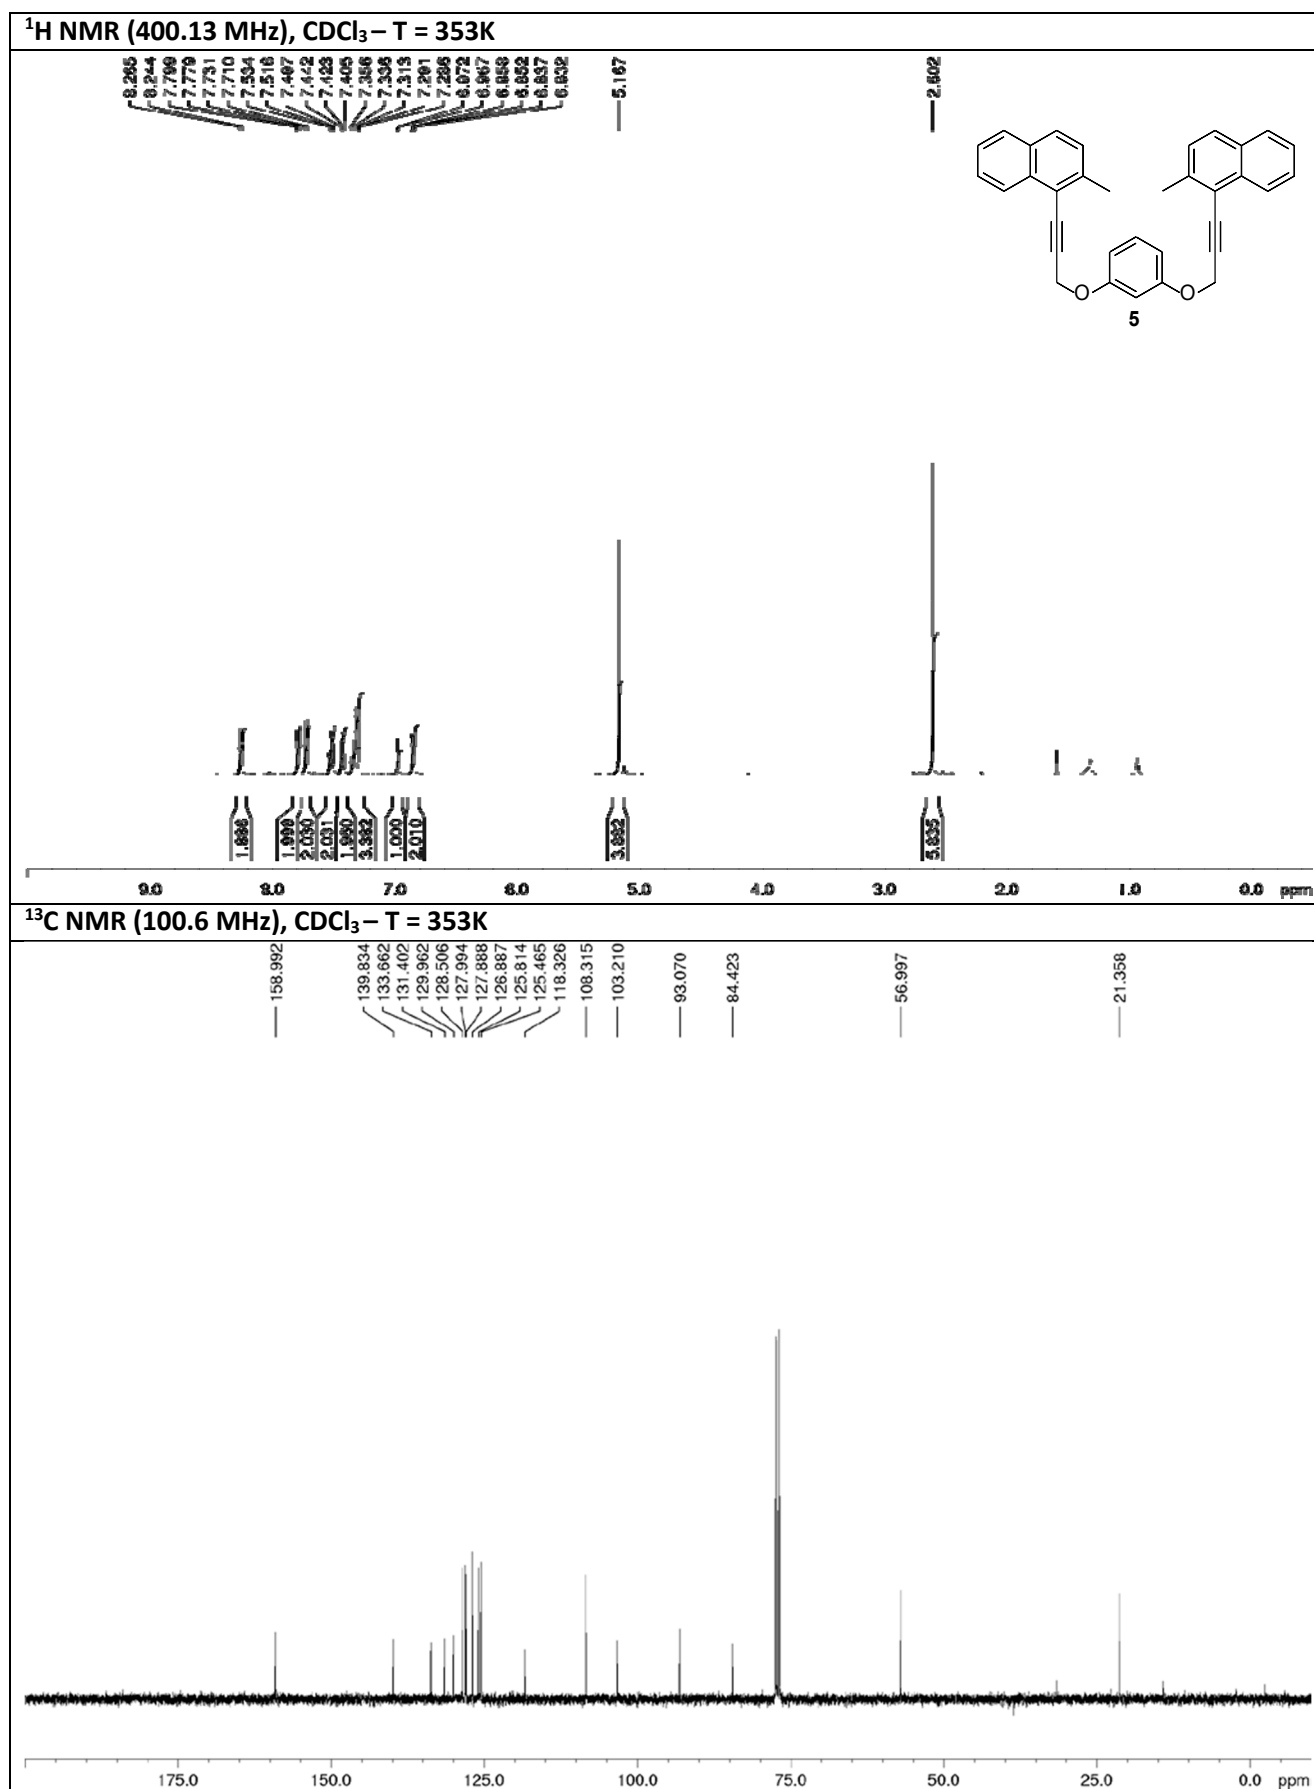

**Figure S1.**  $^1\text{H}$  NMR and  $^{13}\text{C}$  NMR spectra of compound **5** at +25 °C.

## 2. Separation of compounds **1a**/**2a**

Linear and angulated **1a**/**2a** were separated by semipreparative HPLC on silica (a). Column: Silica Adamas (250\*10 mm ID), eluent *n*-Hex/DCM 50/50, flow: 4.0 ml/min, Detector: UV 254 nm. Analytical controls of purified fraction are in Figure S2.

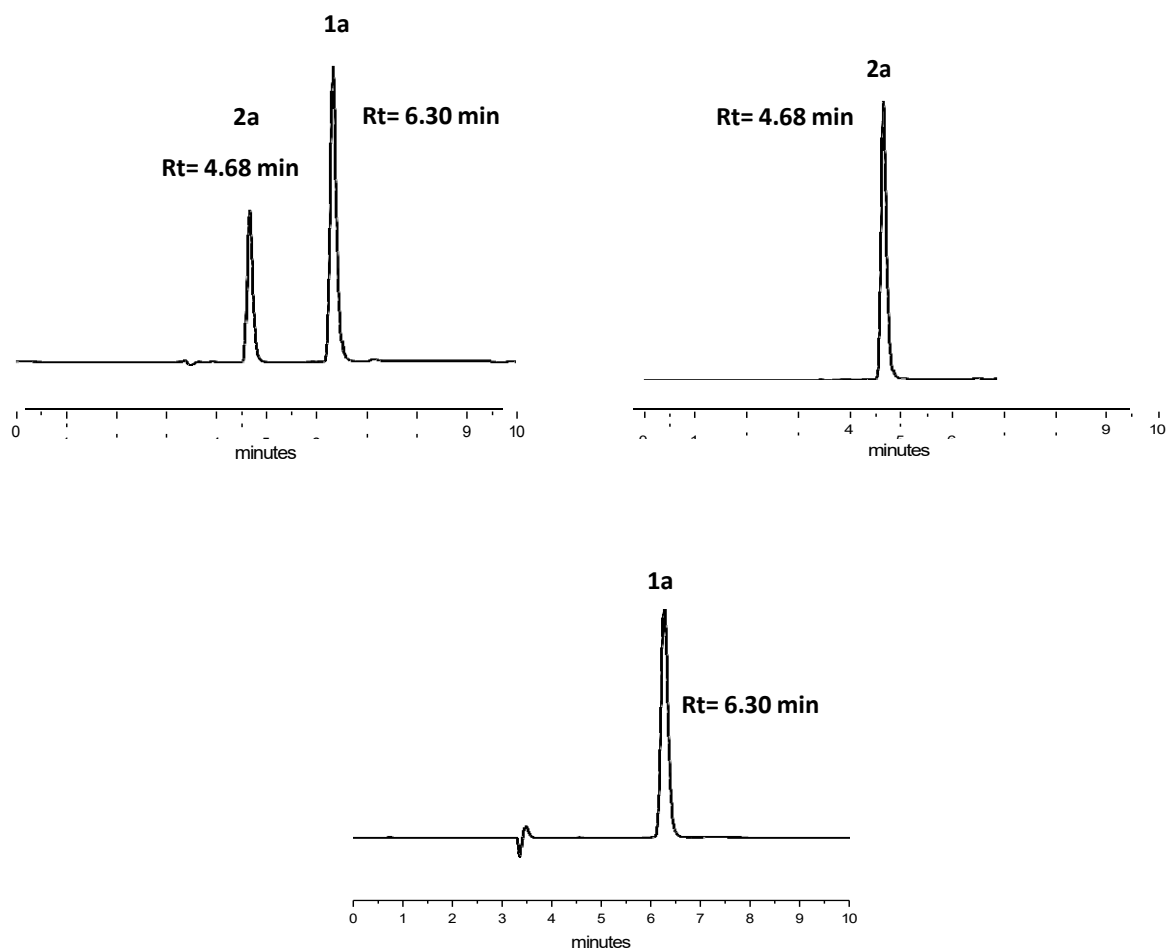

**Figure S2.** Column: Silica Adamas (250\*4.6 mm ID), eluent *n*-Hex/DCM 50/50, flow: 1 ml/min, Detector: UV 254 nm. Isolated product purity: **1a** 99.9 % (c) and **2a** 99.9% (b).

### 3. Characterization of compound 1a

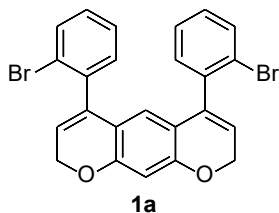

**1a (mixture of stereoisomers):** white solid; mp = 159 - 161 °C; IR (neat): 2925, 2837, 1676, 1576, 1488, 1427  $\text{cm}^{-1}$ ;  $^1\text{H}$ -NMR (400.13 MHz,  $\text{CDCl}_3$ , +25 °C):  $\delta$  7.45 (m, 2 H), 7.19 - 7.16 (m, 3H), 7.06 (dt,  $J_1 = 7.6$  Hz,  $J_2 = 1.8$  Hz, 3H), 6.42 (s, 1H), 5.80 - 5.74 (m, 1H), 5.55 (s, 2H), 4.95 - 4.88 (m, 4H);  $^{13}\text{C}\{^1\text{H}\}$  NMR (100.6 MHz,  $\text{DMSO-d}_6$ , +80 °C):  $\delta$  155.4, 138.7, 136.0, 132.6, 131.2, 129.1, 127.2, 123.7, 123.2, 118.5, 116.4, 104.0, 65.7; HRMS:  $m/z$   $[\text{M} + \text{H}]^+$  calcd for  $\text{C}_{24}\text{H}_{17}\text{Br}_2\text{O}_2$ : 496.9569; found: 496.9565.

Additional  $^1\text{H}$ -NMR e  $^{13}\text{C}$ -NMR at 80 °C in  $\text{DMSO-d}_6$  were recorded to obtain mediated signals for a good quality of spectra considering the faster interconversion of *syn/anti* stereoisomers.

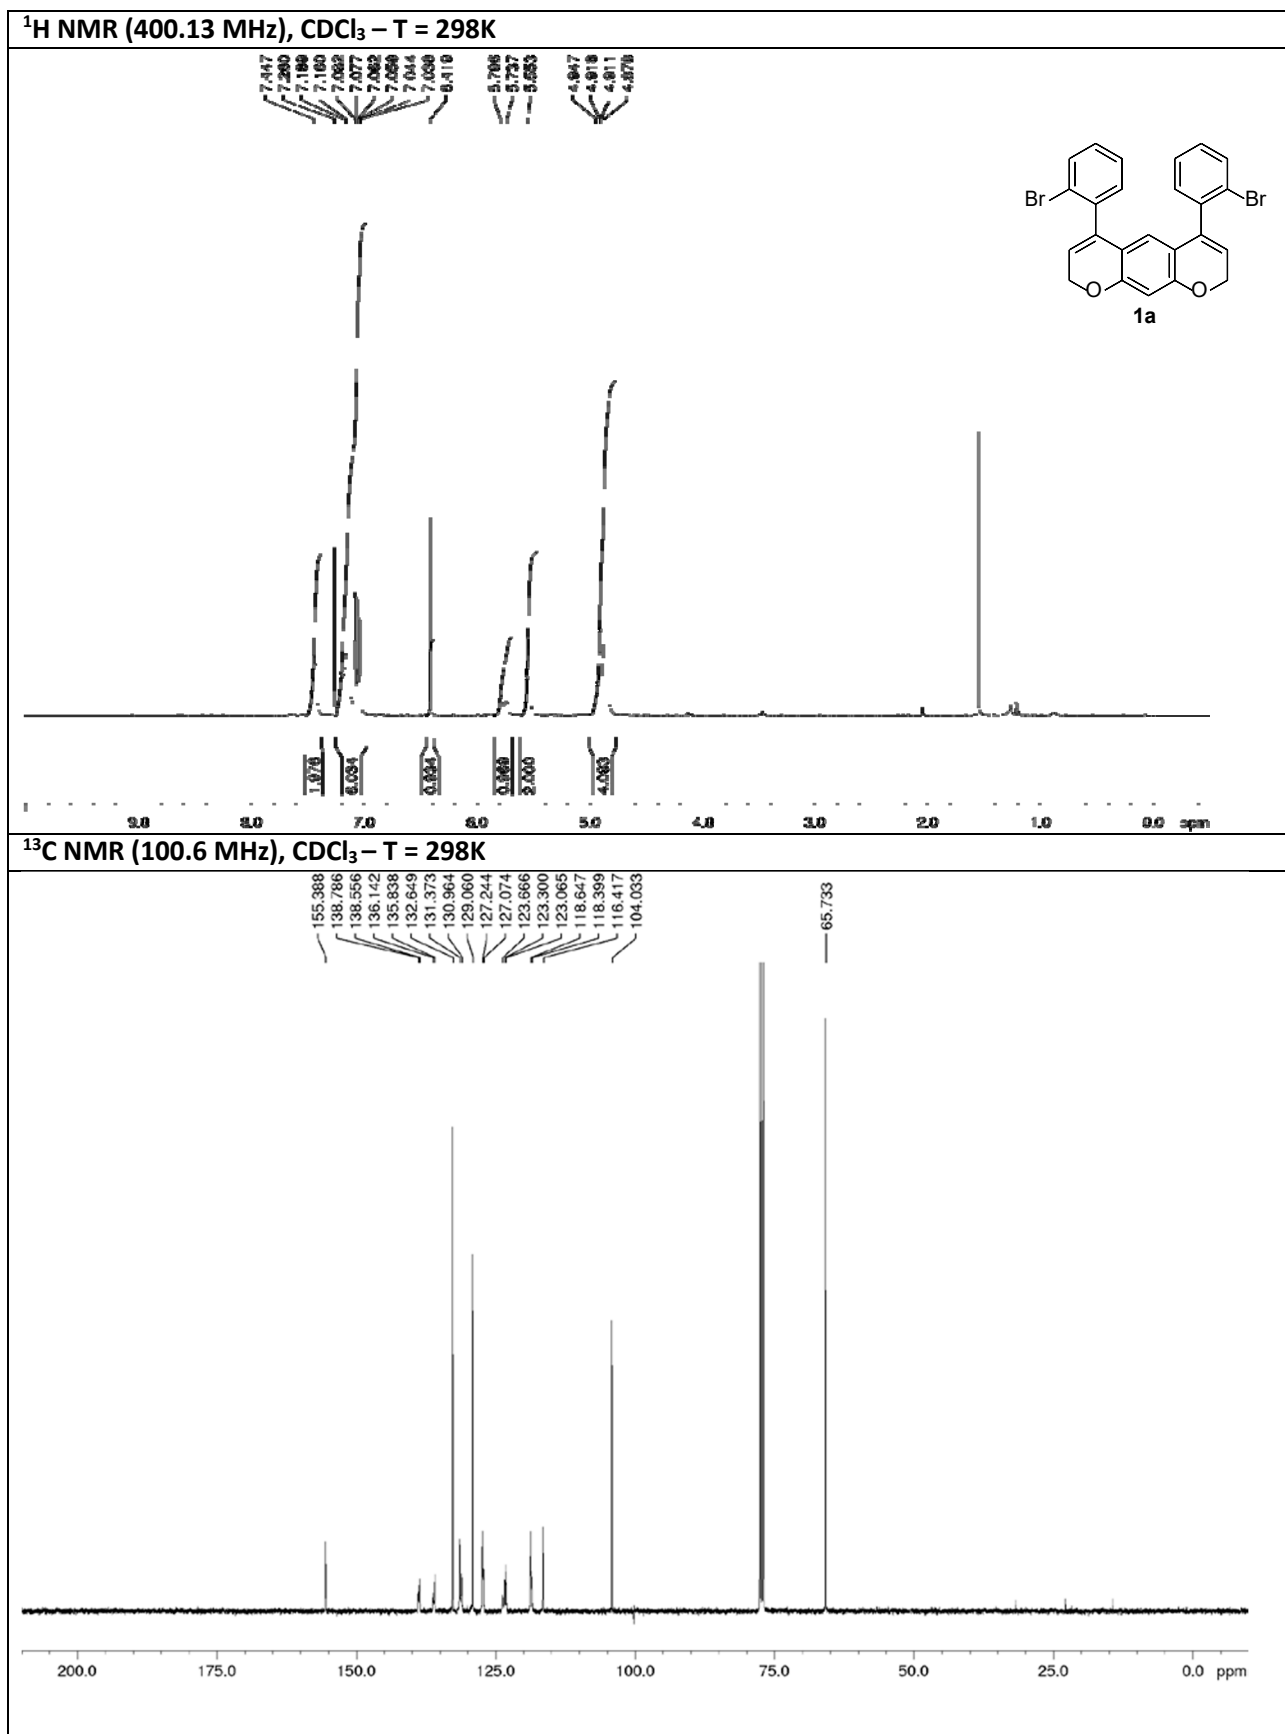

**Figure S3.** <sup>1</sup>H NMR and <sup>13</sup>C NMR spectra of compound **1a** at +25 °C.

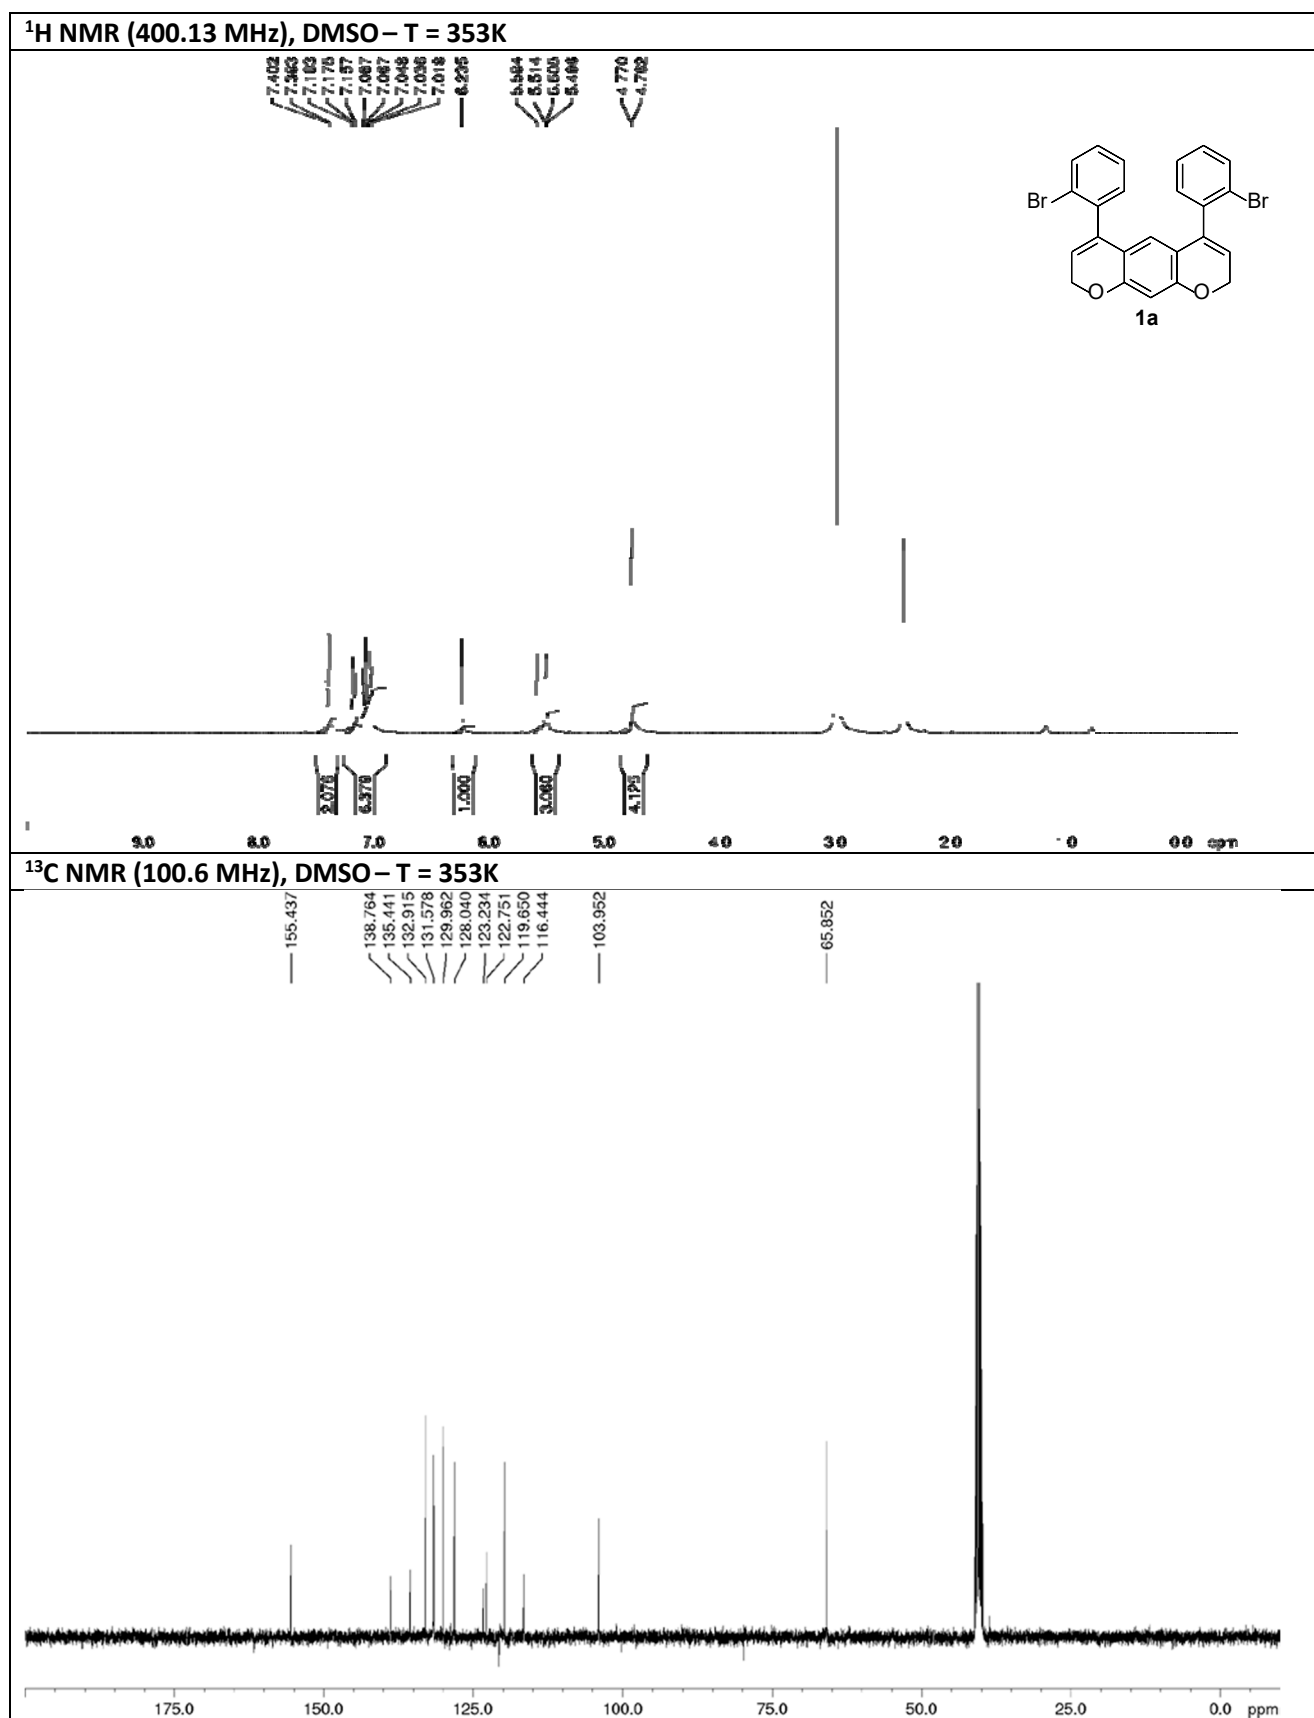

**Figure S4.** <sup>1</sup>H NMR and <sup>13</sup>C NMR spectra of compound **1a** at +80 °C.

#### 4. Full characterization of compound 2a

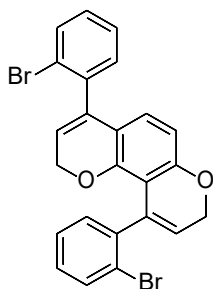

**2a**

**2a (mixture of stereoisomers):** yellow oil; IR (neat): 2930, 2835, 1676, 1575, 1490, 1427  $\text{cm}^{-1}$ ;  $^1\text{H}$  NMR (400.13 MHz) ( $\text{CDCl}_3$ ): 7.55-7.47 (m, 2H), 7.27-6.98 (m, 6H), 6.36 (s, 2H), 5.65 (bs, 1H), 5.39 (bs, 1H), 4.76 - 4.61 (m, 2H), 4.42 - 4.33 (m, 1H), 4.22 - 4.14 (m, 1H);  $^{13}\text{C}\{^1\text{H}\}$  NMR (100.6 MHz) ( $\text{CDCl}_3$ ):  $\delta$  155.7, 150.6, 142.6, 139.4, 136.5, 135.3, 133.0, 132.0, 131.4, 130.0, 129.3, 128.3, 127.5, 127.0, 126.3, 123.8, 122.6, 122.2, 118.9, 117.8, 112.4, 109.3, 65.0, 64.9; HRMS:  $m/z$   $[\text{M} + \text{H}]^+$  calcd for  $\text{C}_{24}\text{H}_{17}\text{Br}_2\text{O}_2$ : 496.9569; found: 496.9565.



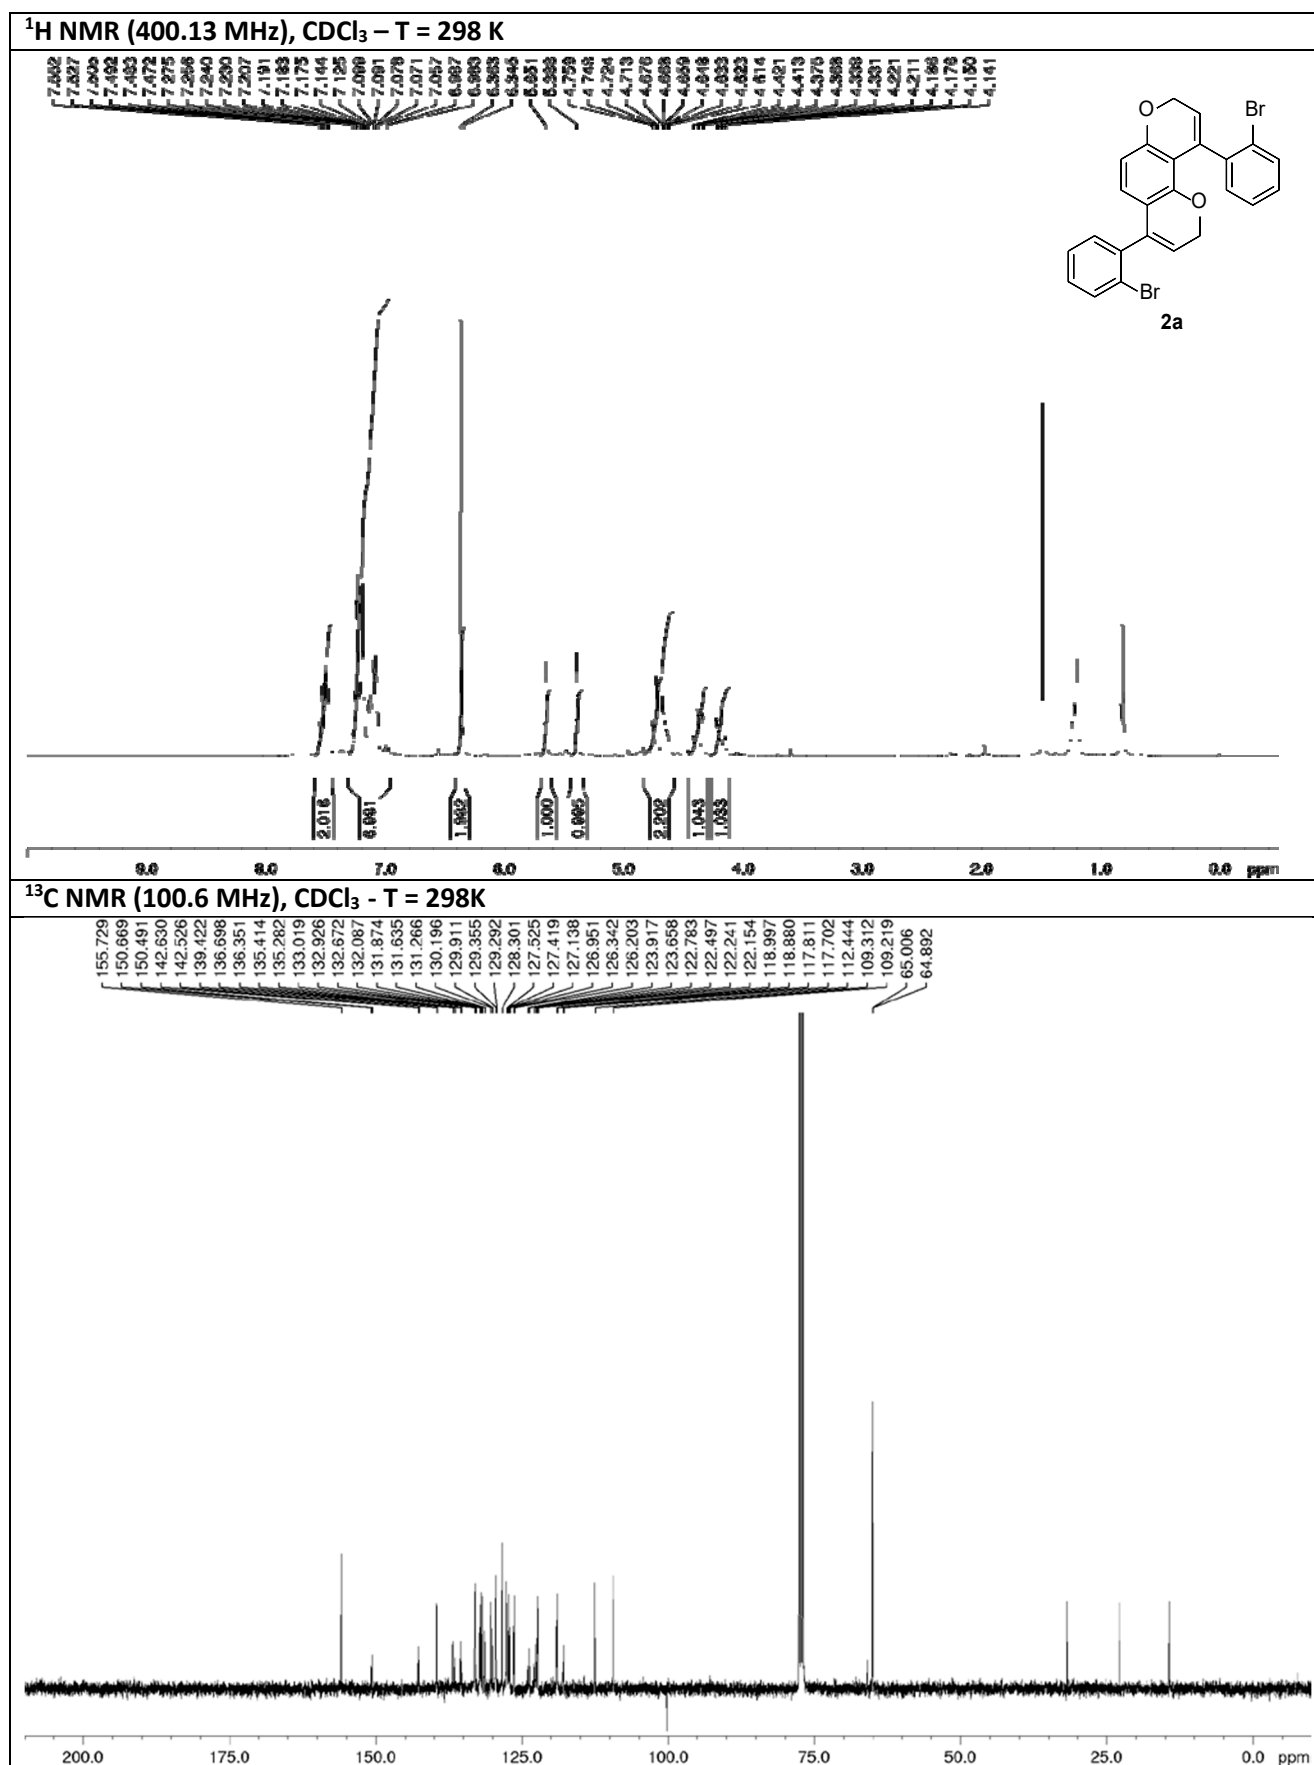

**Figure S5.** <sup>1</sup>H NMR and <sup>13</sup>C NMR spectra of compound **2a** at +25 °C.

#### 4.1 DFT Calculations of *syn/anti* for compounds **2a**

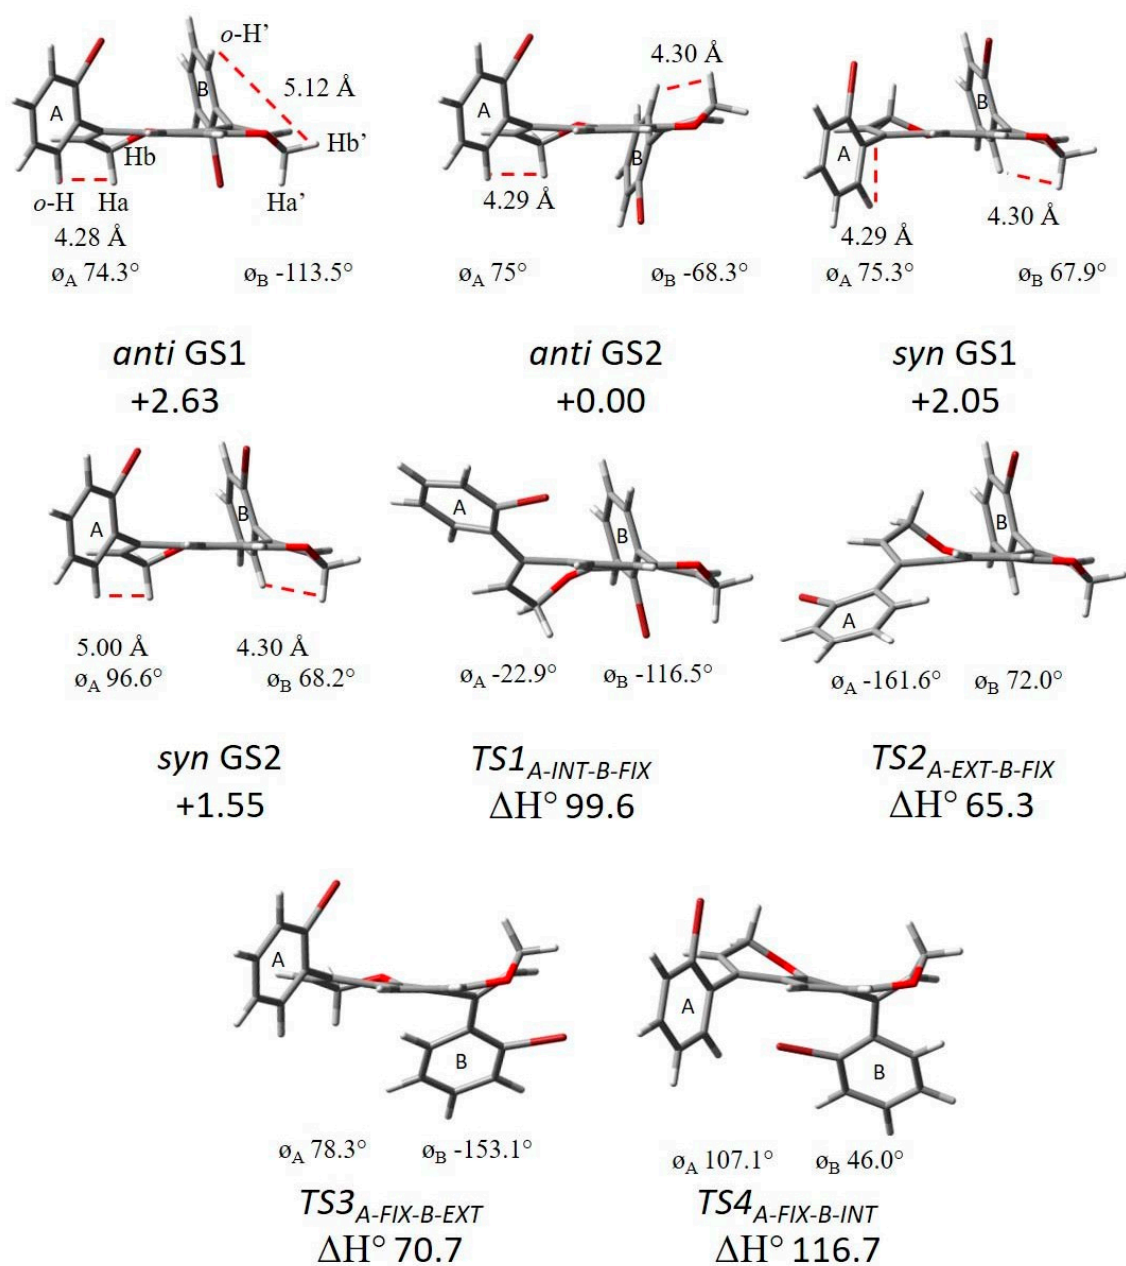

**Figure S6.** Predicted DFT (6-311++G(d,p), PCM=chloroform) conformations of *syn/anti* for compounds **2a** are shown. The relative Enthalpy energies are reported in kJ/mol.

**Table S1.** Descriptors are shown:  $r$  = atom distance;  $\phi$  = dihedral angle

| 2a                             | $r(\text{H}_a - \text{oH})$ | $r(\text{H}_b - \text{oH})$ | $r(\text{H}_a' - \text{oH}')$ | $r(\text{H}_b' - \text{oH}')$ | $\phi_A$     | $\phi_B$      | % <i>pop</i> |
|--------------------------------|-----------------------------|-----------------------------|-------------------------------|-------------------------------|--------------|---------------|--------------|
| GS1 <i>anti</i>                | 4.28                        | 5.09                        | 5.40                          | 5.12                          | 74.30        | -113.50       | 15.74        |
| GS2 <i>anti</i>                | 4.29                        | 5.11                        | 4.30                          | 4.99                          | 75.00        | -68.30        | 43.71        |
| GS1 <i>syn</i>                 | 4.29                        | 5.11                        | 4.30                          | 4.99                          | 75.30        | 67.90         | 16.16        |
| GS2 <i>syn</i>                 | 5.41                        | 5.00                        | 4.30                          | 4.99                          | 96.60        | 68.20         | 24.37        |
| avg. <i>anti</i> vs <i>syn</i> | 4.29 vs 4.96                | 5.10 vs 5.04                | 4.59 vs 4.29                  | 5.02 vs 4.99                  | 74.8 vs 88.1 | -80.3 vs 68.1 | 59.5/40.5    |

#### 4.2 DNMR experiment of compound 2a.

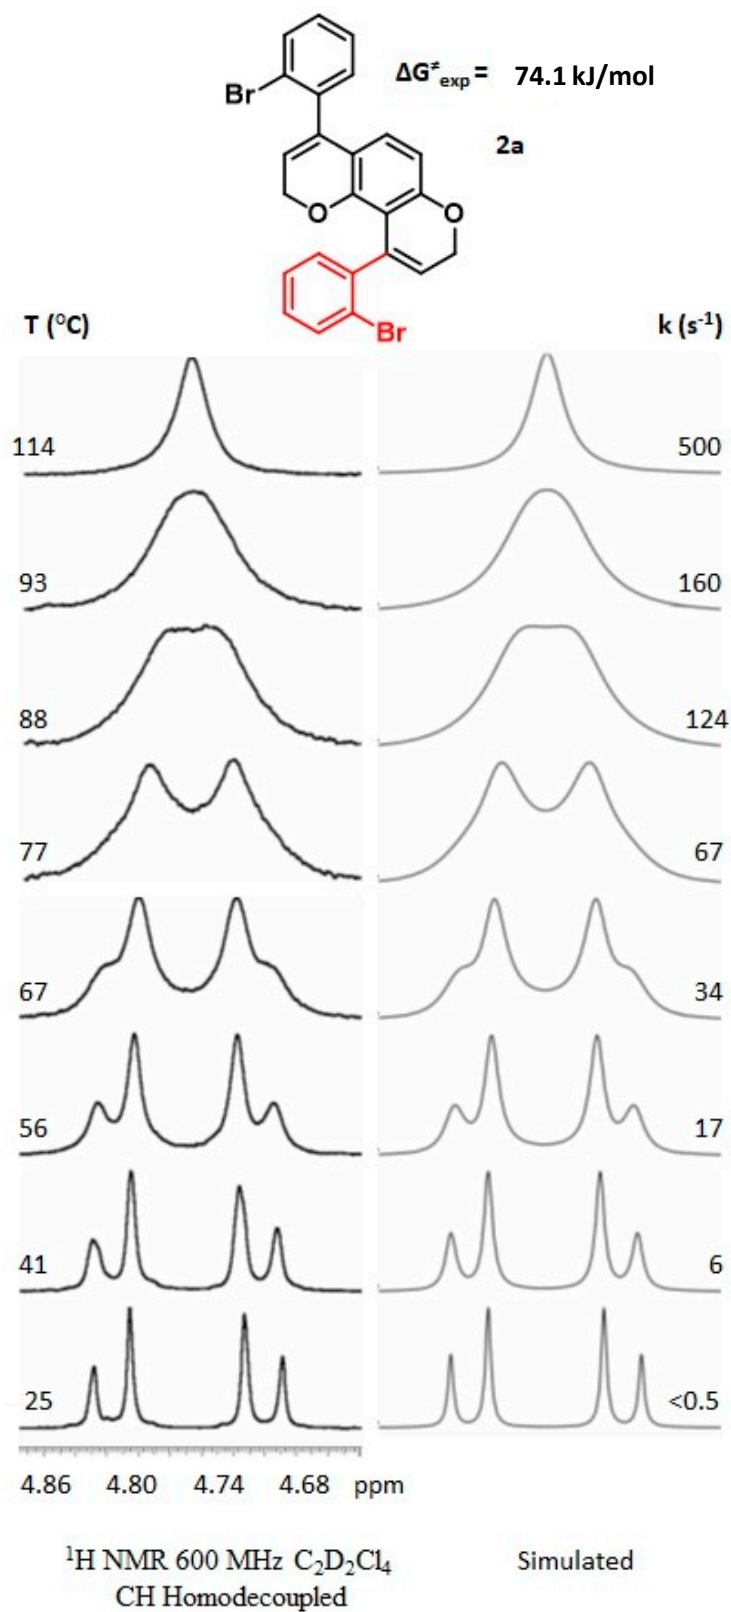

**Figure S7.** Simulated and experimental dynamic  $^1\text{H NMR}$  (600 MHz) spectra in  $\text{C}_2\text{D}_2\text{Cl}_4$  of compound **2a** for the enantiomerization process. For each temperature (left column) correspond a kinetic constant (right column). The vinylic  $^1\text{H NMR}$  signal at 5.77 ppm was homo-decoupled to simplify the spin system of adjacent  $\text{CH}_2$  from ABX to AB system.

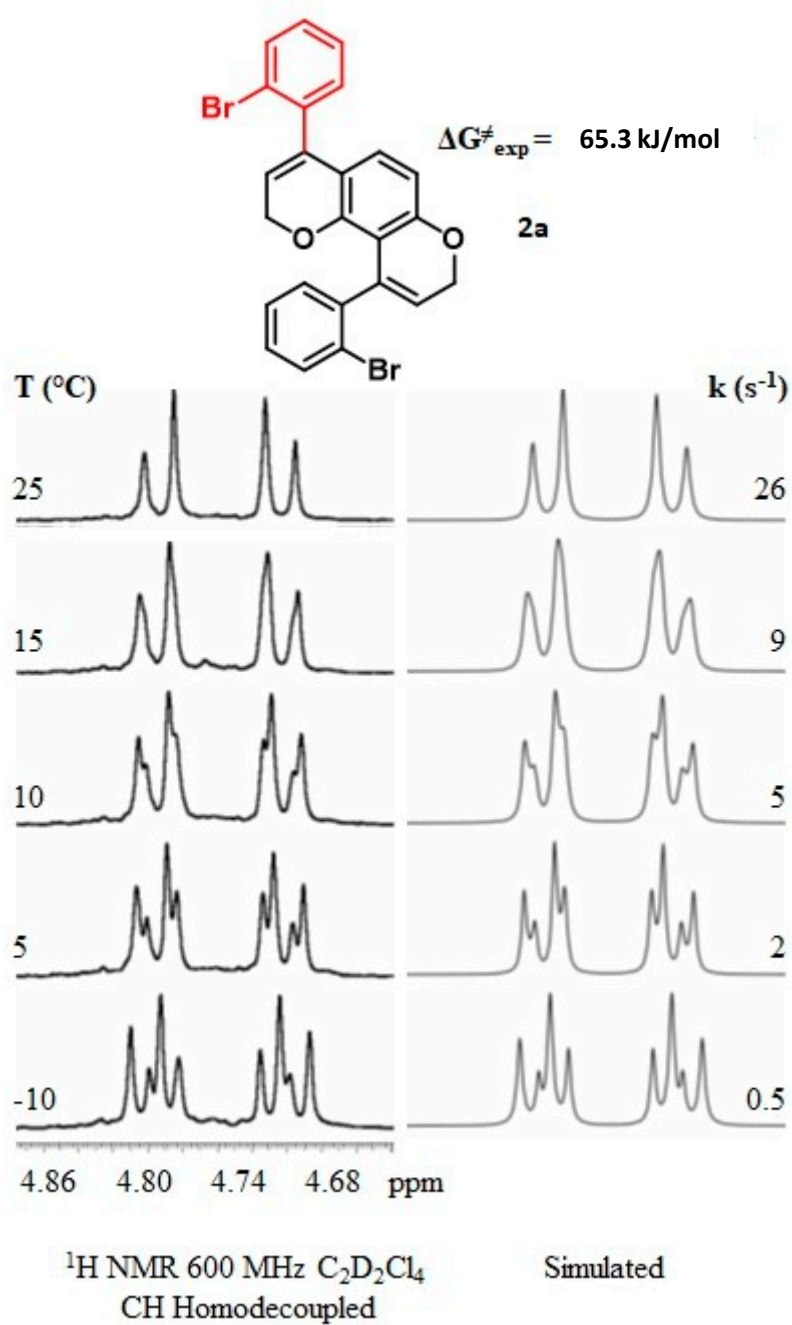

**Figure S8.** Simulated and experimental dynamic <sup>1</sup>H NMR (600 MHz) spectra in C<sub>2</sub>D<sub>2</sub>Cl<sub>4</sub> of compound **2a** for the diastereomerization process. For each temperature (left column) correspond a kinetic constant (right column). The vinylic <sup>1</sup>H NMR signal at 5.77 ppm was homo-decoupled to simplify the spin system of adjacent CH<sub>2</sub> from ABX to AB system.

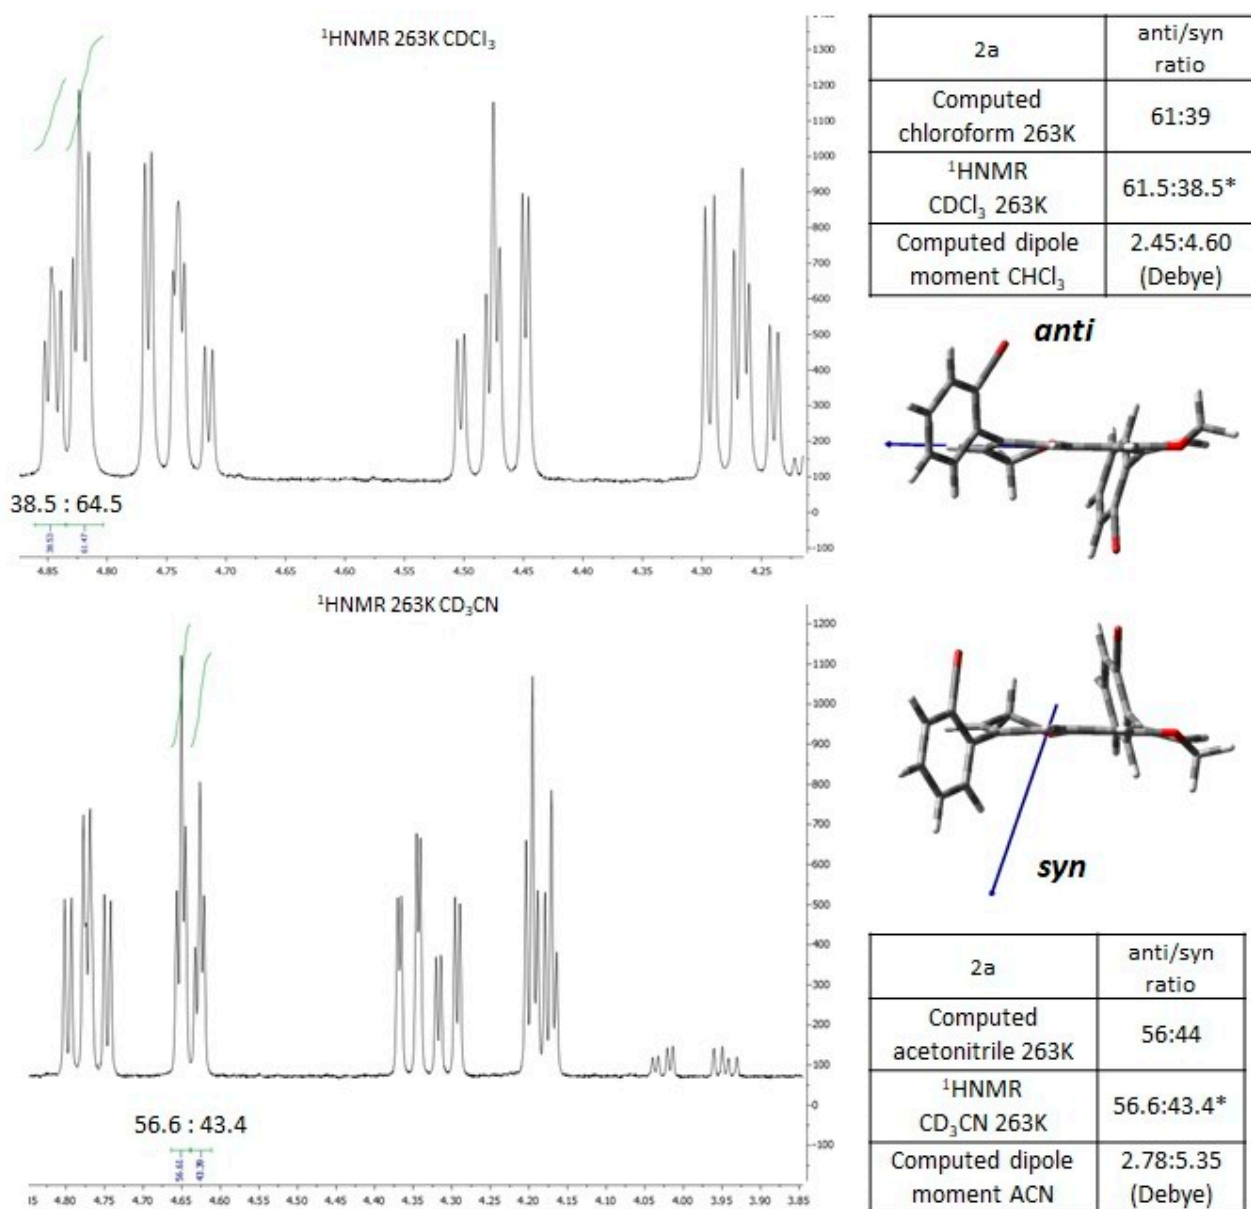

**Figure S9.** top: recorded <sup>1</sup>H NMR spectra of **2a** at -10 °C (263 K) in CDCl<sub>3</sub>, CH<sub>2</sub> signals (ABX system region).  
bottom: recorded <sup>1</sup>H NMR spectra of **2a** at -10 °C (263 K) in CD<sub>3</sub>CN, CH<sub>2</sub> signals (ABX system region).

\* Computed dipole moments were averaged using the Boltzmann population of the single GSs.

**5. Synthesis of 4,6-bis(2-methylnaphthalen-1-yl)-2*H*,8*H*-pyrano[3,2-*g*]chromene (**1b**) and 4,10-bis(2-methylnaphthalen-1-yl)-2*H*,8*H*-pyrano[2,3-*f*]chromene (**2b**):**

In a 50 mL Carousel Tube Reactor (Radely Discovery Technology) containing a magnetic stirring bar 1,3-bis((3-(2-methylnaphthalen-1-yl)prop-2-yn-1-yl)oxy)benzene (121 mg, 0.26 mmol, 1 equiv.) was dissolved in CH<sub>2</sub>Cl<sub>2</sub> (2 mL) at room temperature. Then [tris(2,4-di-*tert*-butylphenyl)phosphite]gold(I) chloride (9.1 mg, 0.01 mmol., 0.04 equiv.) was added followed by AgSbF<sub>6</sub> (3.6 mg, 0.01 mmol., 0.04 equiv.). The mixture was allowed to stir for an hour and then CH<sub>2</sub>Cl<sub>2</sub> was evaporated under reduced pressure. The residue was purified by chromatography on SiO<sub>2</sub> (25-40 μm), eluting with a 97/3 (v/v) *n*-hexane/AcOEt mixture to obtain a mixture of 4,6-bis(2-methylnaphthalen-1-yl)-2*H*,8*H*-pyrano[3,2-*g*]chromene **1b** and 4,10-bis(2-methylnaphthalen-1-yl)-2*H*,8*H*-pyrano[2,3-*f*]chromene **2b** in a ratio of 87/13. For product characterization see following sections.

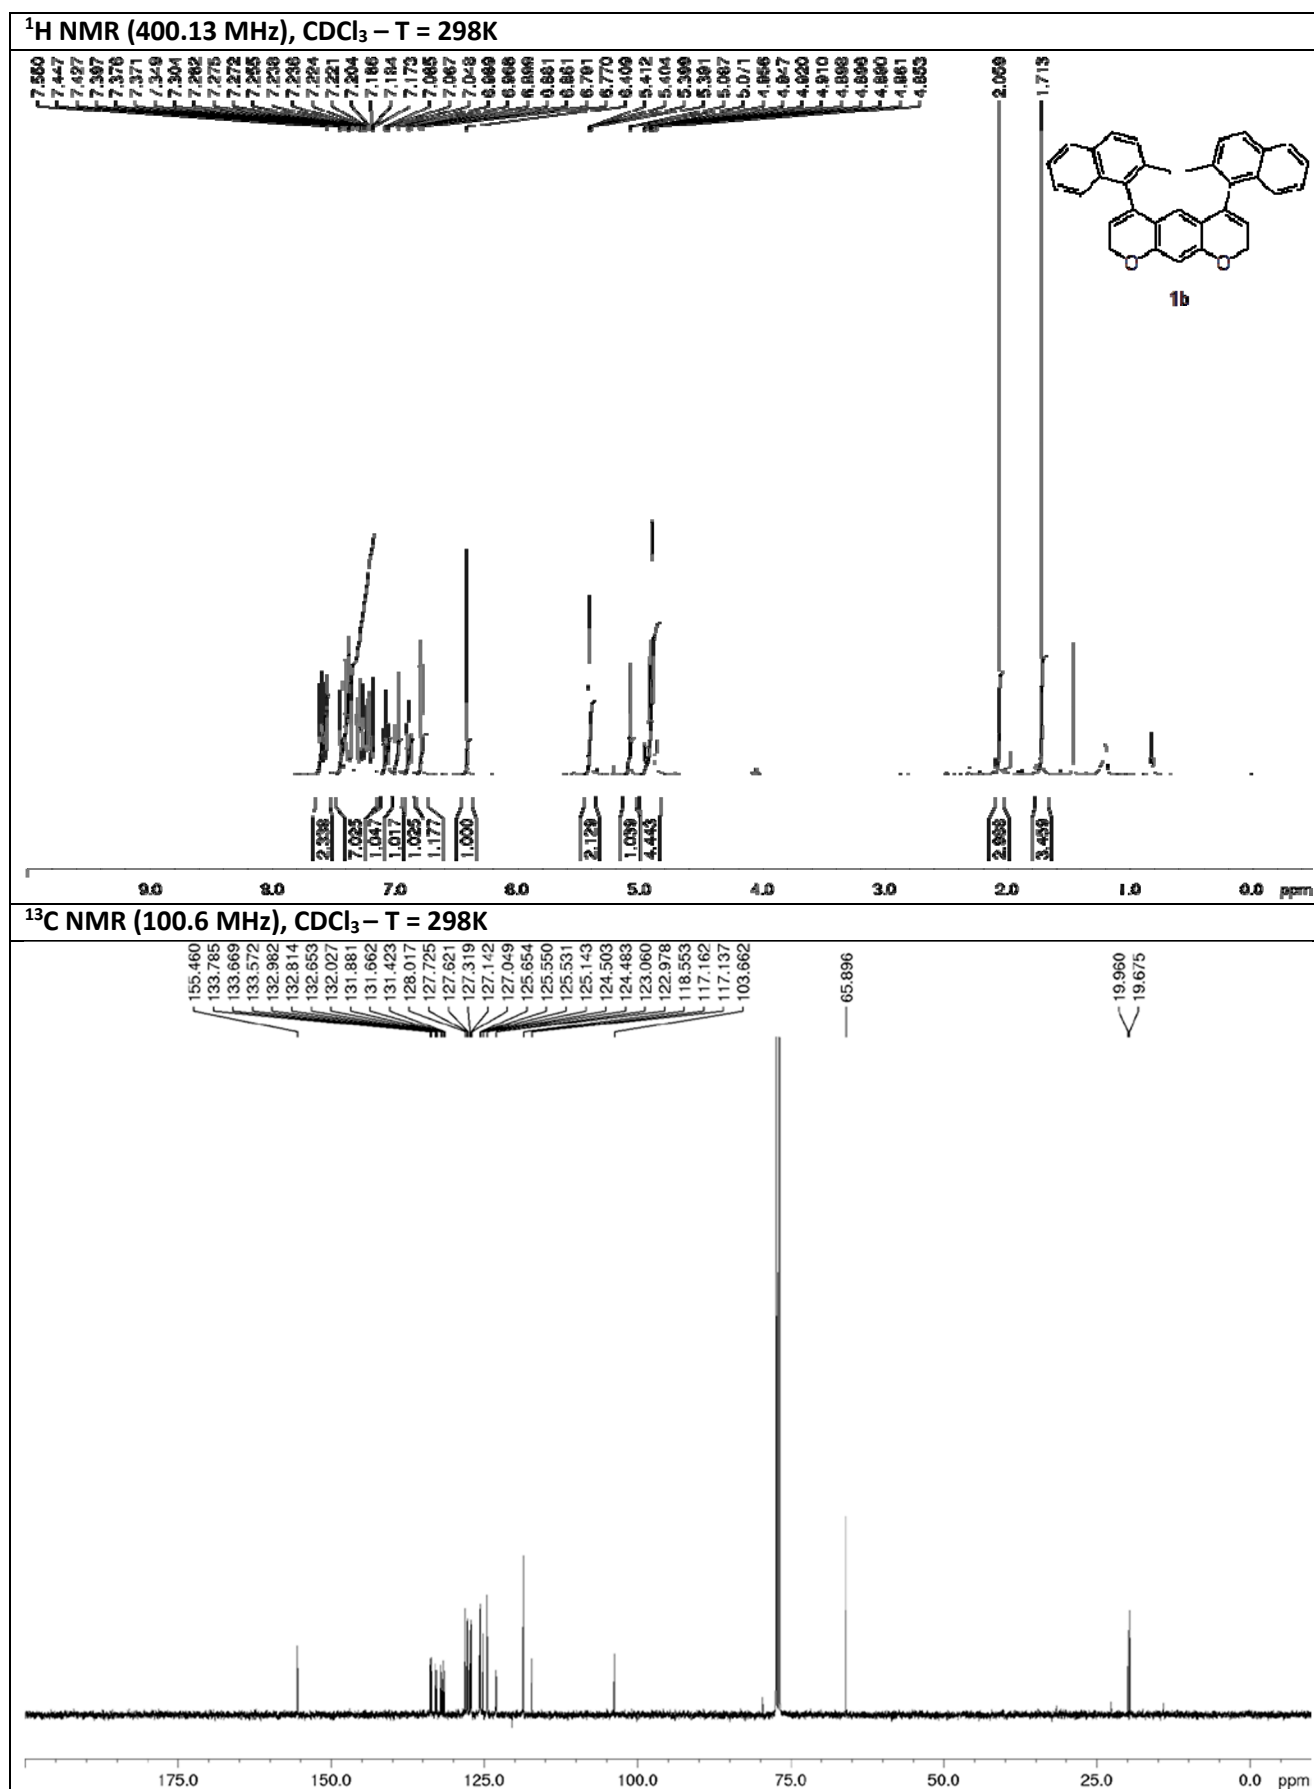

**Figure S10.**  $^1\text{H}$  NMR and  $^{13}\text{C}$  NMR spectra of compound **1b** mixture of isomers at +25 °C.

## 6. Full characterization of *syn/anti* 1b

*Syn/Anti* stereoisomers were separated by semipreparative HPLC on (*S,S*)-Whelk-O2 10 micron (250\*10 mm L\*ID) by using hexane/dichloromethane 95/5 + 0.1% ethanol at flow rate of 4.0 ml/min. Detector UV 254 nm. In the analytical version, geometry of column was 150\*4.6 mm L\*ID (chromatographic trace in **figure S11** (black trace). *Anti* and *syn* stereoisomers were assigned based on CD signal (see red trace on the same figure). After separation, <sup>1</sup>H-NMR spectra of two stereoisomer were acquired.

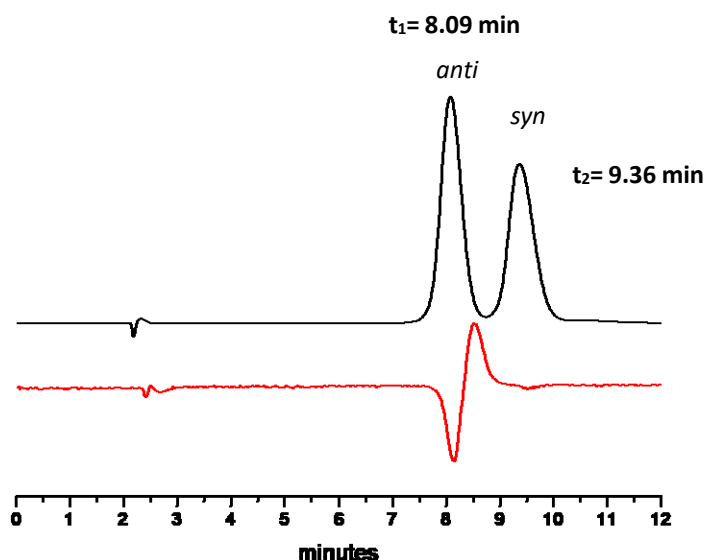

**Figure S11.** HPLC separation on (*S,S*)-Whelk-O2 10 micron (250\*10 mm L\*ID) by using *n*-hexane/dichloromethane 95/5 + 0.1% ethanol at flow rate of 4.0 ml/min. Detector UV 254 nm. In the analytical version, geometry of column was 150\*4.6 mm L\*ID (chromatographic black trace). *Anti* and *syn* stereoisomers were assigned based on CD signal (red trace).

**1b (*syn*):** <sup>1</sup>H NMR (600 MHz) (CDCl<sub>3</sub>): d (ppm) 7.51 (d, *J* = 5.4 Hz, 2H), 7.44 (d, *J* = 5.5 Hz, 2H), 7.37 (d, *J* = 5.6 Hz, 2H), 7.16 – 7.13 (m, 2H), 7.06 (d, *J* = 5.6 Hz, 2H), 6.97 – 6.94 (m, 2H), 6.48 (s, 1H), 5.48 (t, *J* = 2.4 Hz, 2H), 5.16 (s, 1H), 5.00 – 4.94 (m, 4H), 2.13 (s, 6H); <sup>13</sup>C{<sup>1</sup>H} NMR (150 MHz) (CDCl<sub>3</sub>): d (ppm) 155.4, 133.8, 133.0, 132.8, 131.9, 131.4, 127.7, 127.3, 127.1, 125.5, 125.1, 124.5, 123.0, 118.5, 117.1, 103.6, 65.9, 19.9.

**1b (*anti*):** <sup>1</sup>H NMR (600 MHz) (CDCl<sub>3</sub>): d (ppm) 7.68 (d, *J* = 5.3 Hz, 2H), 7.63 (d, *J* = 5.5 Hz, 2H), 7.46 (d, *J* = 5.6 Hz, 2H), 7.35 – 7.27 (m, 4H), 6.86 (d, *J* = 5.6 Hz, 2H), 6.48 (s, 1H), 5.48 (t, *J* = 2.4 Hz, 2H), 5.14 (s, 1H), 5.03 – 4.94 (m, 4H), 1.79 (s, 6H); <sup>13</sup>C{<sup>1</sup>H} NMR (150 MHz) (CDCl<sub>3</sub>): d (ppm) 155.5, 133.7, 133.6, 132.6, 132.0, 131.7, 128.0, 127.6, 127.0, 125.6, 125.5, 124.5, 123.0, 118.5, 117.1, 103.6, 65.9, 19.6.



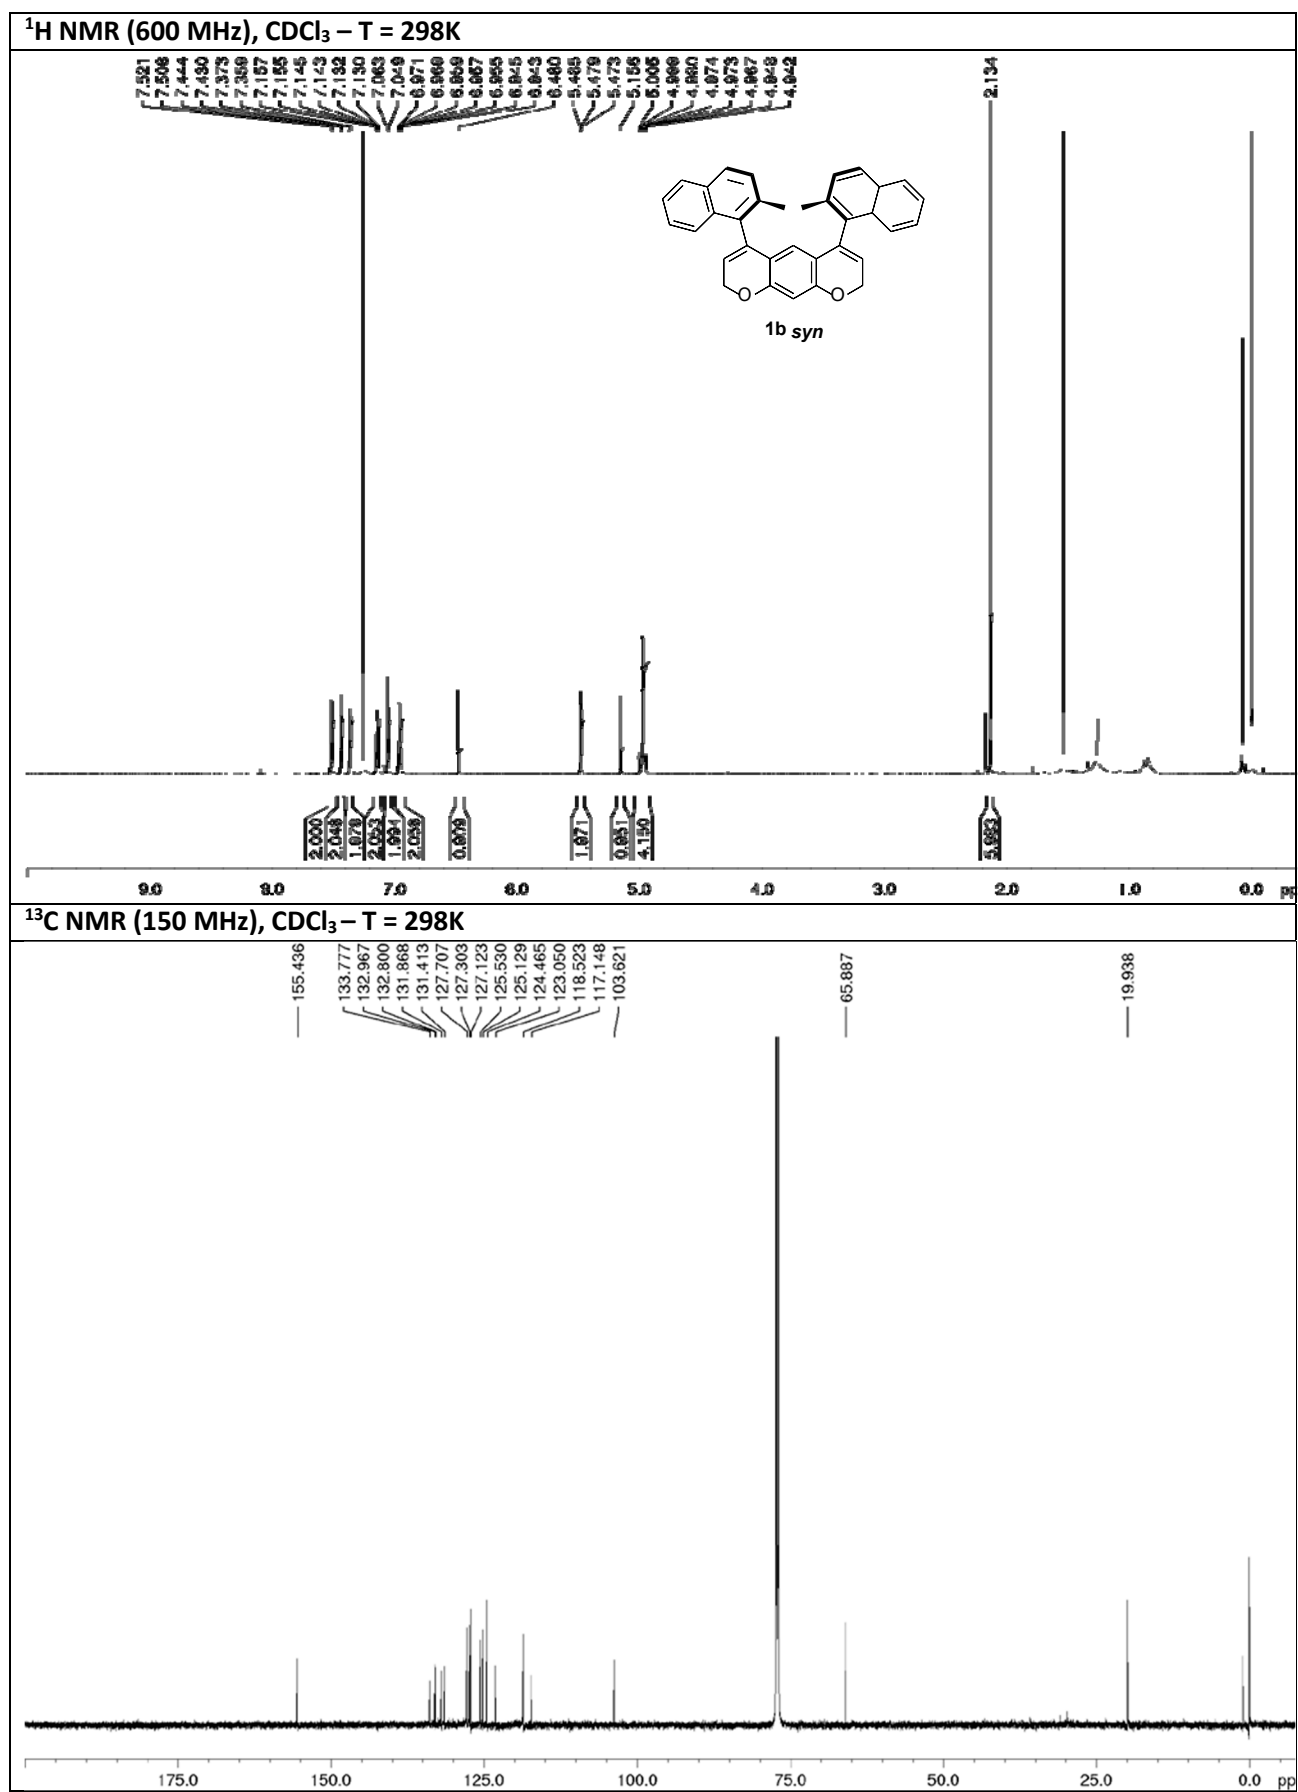

**Figure S12.** <sup>1</sup>H NMR and <sup>13</sup>C NMR spectra of compound **1b (syn)** at +25 °C.

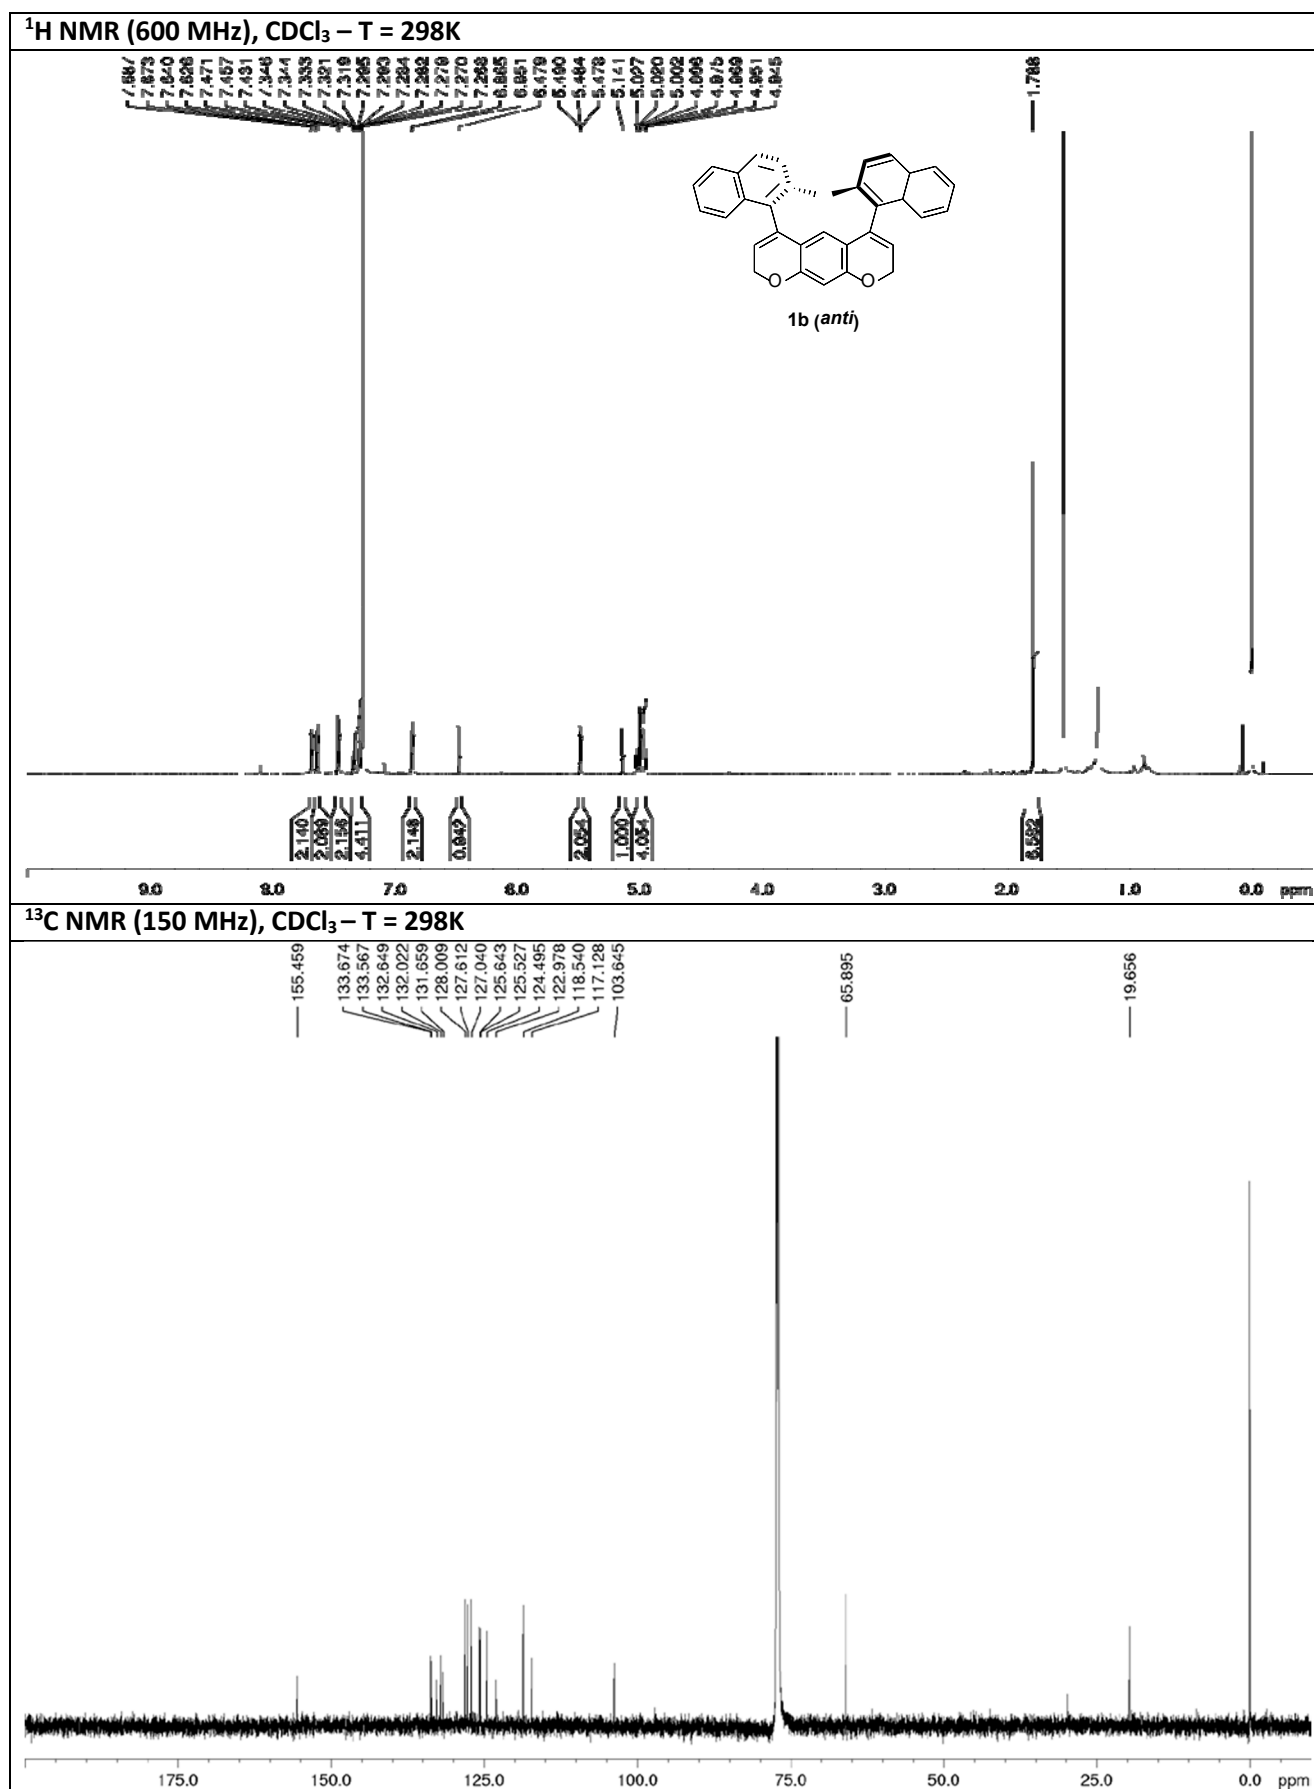

**Figure S13.** <sup>1</sup>H NMR and <sup>13</sup>C NMR spectra of compound **1b (anti)** at +25 °C.

## 6.1 DFT Calculations of *syn/anti* for compounds **1b**

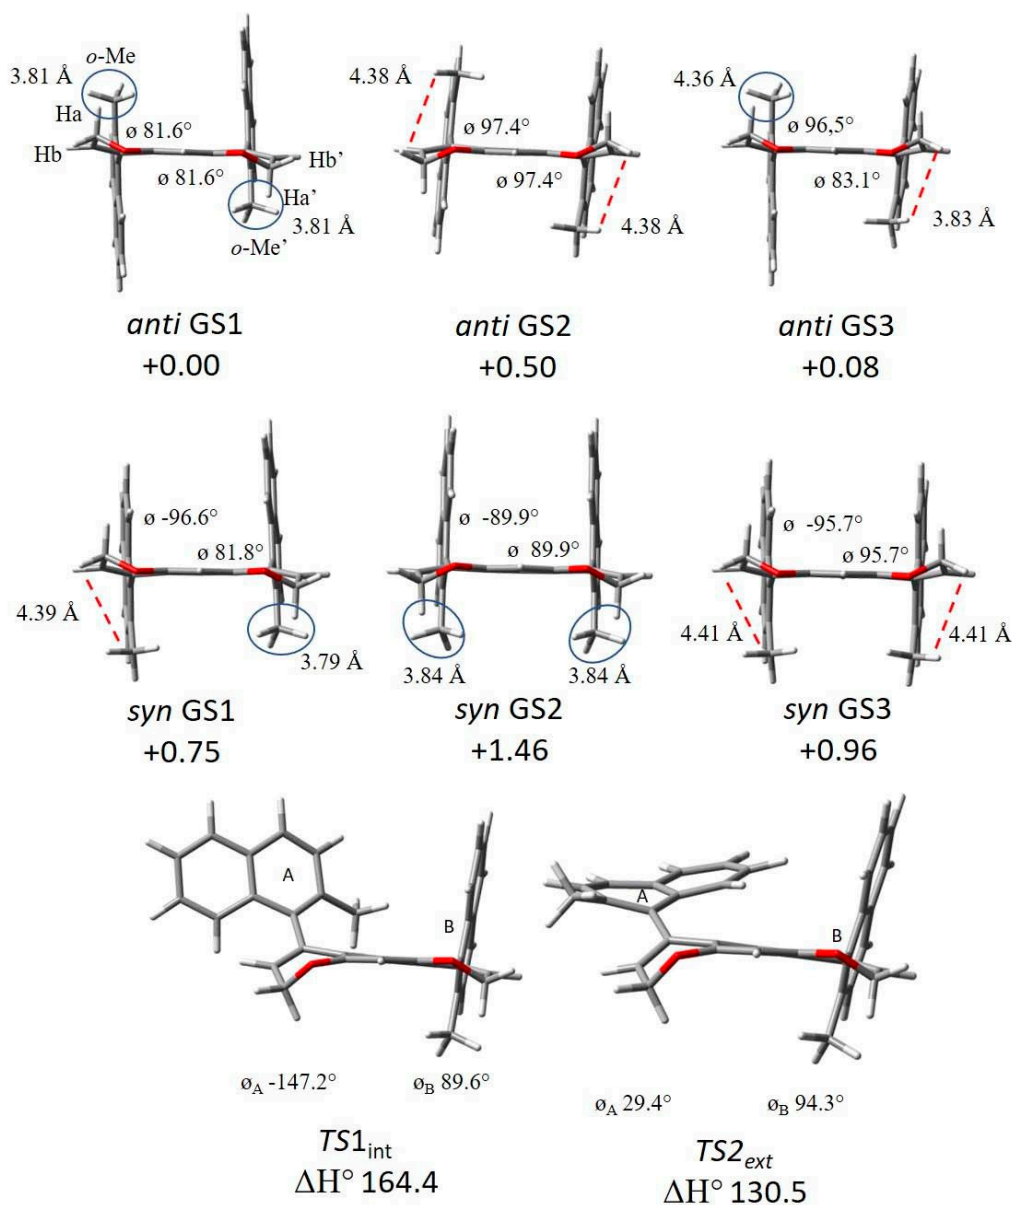

**Figure S14.** Predicted DFT (6-31+G(d,p), PCM=chloroform) conformations of *syn/anti* for compounds **1b** are shown. The relative Enthalpy energies are reported in kJ/mol.

**Table S2.** Descriptors are shown: *r* = atom distance;  $\phi$  = dihedral angle

| <b>1b</b>                      | <b><i>r</i> (H<sub>a</sub> - <i>o</i>Me)</b> | <b><i>r</i> (H<sub>b</sub> - <i>o</i>Me)</b> | <b><i>r</i> (H<sub>a</sub>' - <i>o</i>Me')</b> | <b><i>r</i> (H<sub>b</sub>' - <i>o</i>Me')</b> | <b><math>\phi_A</math></b> | <b><math>\phi_B</math></b> | <b>% <i>pop</i></b> |
|--------------------------------|----------------------------------------------|----------------------------------------------|------------------------------------------------|------------------------------------------------|----------------------------|----------------------------|---------------------|
| GS1 <i>anti</i>                | 3.81                                         | 5.03                                         | 3.81                                           | 5.03                                           | 81.60                      | 81.60                      | 20.10               |
| GS2 <i>anti</i>                | 5.17                                         | 4.38                                         | 5.17                                           | 4.38                                           | 97.40                      | 97.40                      | 17.02               |
| GS3 <i>anti</i>                | 4.36                                         | 5.16                                         | 5.00                                           | 3.83                                           | 96.50                      | 83.10                      | 19.31               |
| GS1 <i>syn</i>                 | 5.19                                         | 4.39                                         | 3.79                                           | 5.01                                           | -96.60                     | 81.80                      | 15.80               |
| GS2 <i>syn</i>                 | 3.84                                         | 5.00                                         | 3.84                                           | 5.00                                           | -89.90                     | 89.90                      | 12.90               |
| GS3 <i>syn</i>                 | 5.22                                         | 4.41                                         | 5.22                                           | 4.41                                           | -95.74                     | 95.71                      | 14.80               |
| avg. <i>anti</i> vs <i>syn</i> | 4.40 vs 4.80                                 | 4.87 vs 4.58                                 | 4.63 vs 4.29                                   | 4.42 vs 4.80                                   | 91.5 vs -94.3              | 86.9 vs 88.1               | 56/44               |

## 6.2 DFT Calculations of *syn/anti* for compounds **2b**

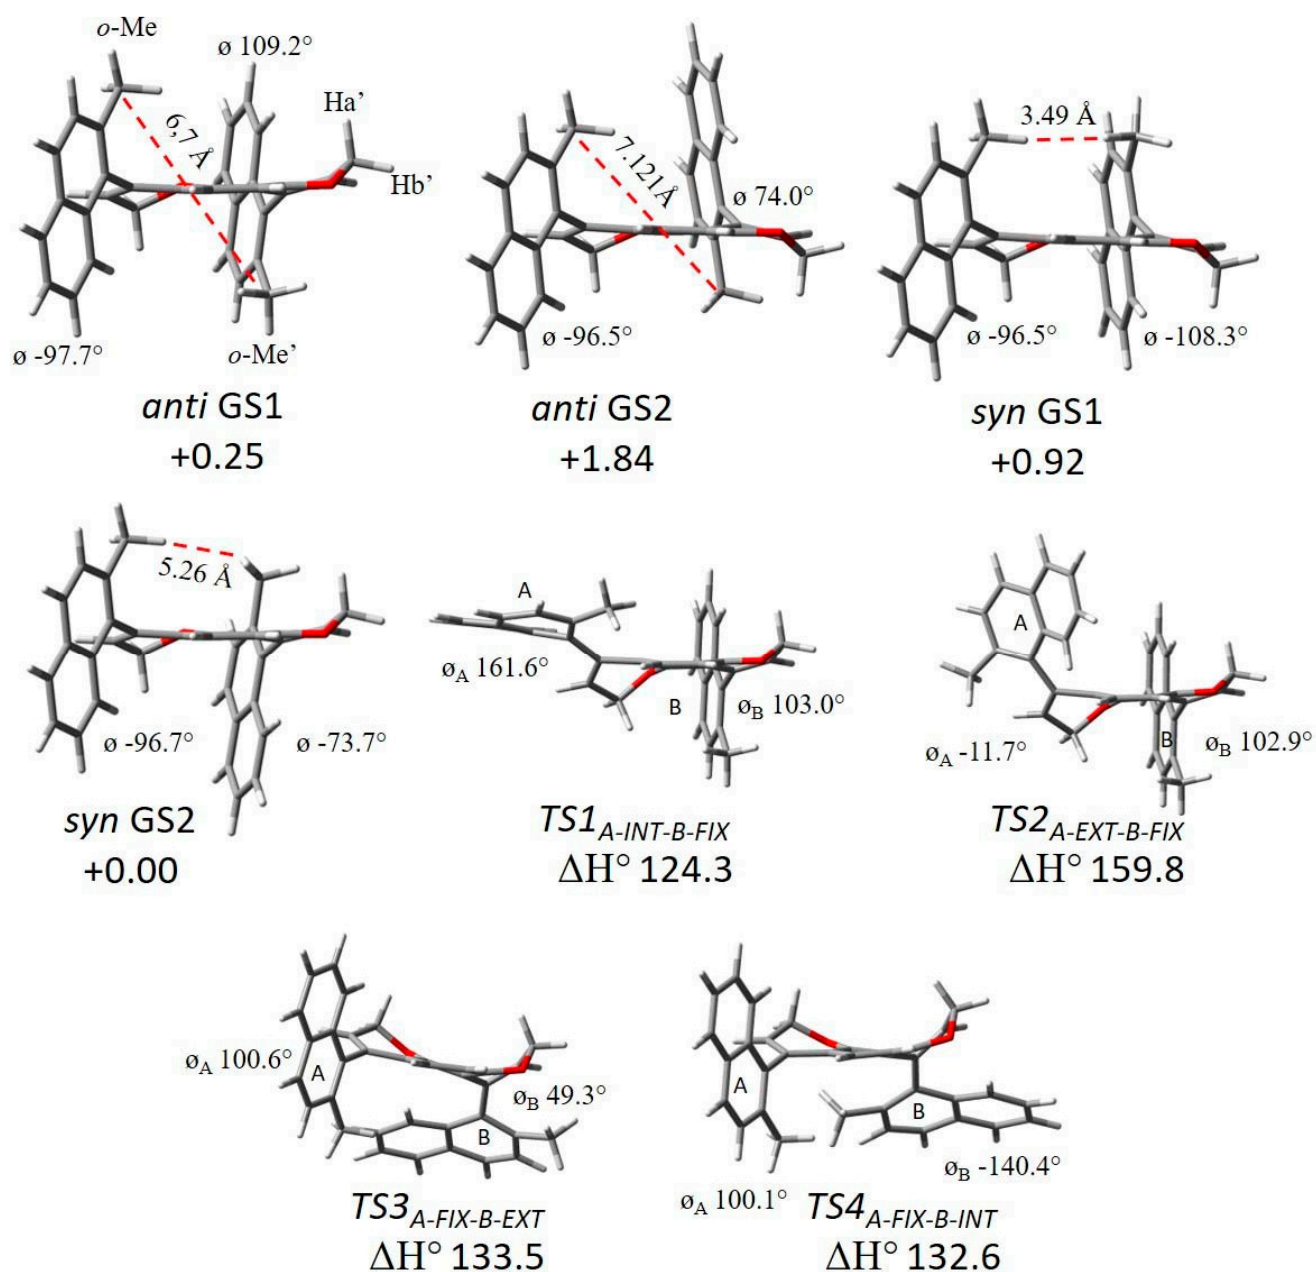

**Figure S15.** Predicted DFT (6-31+G(d,p), PCM=chloroform) conformations of *syn/anti* for compounds **2b** are shown. The relative Enthalpy energies are reported in kJ/mol.

**Table S3.** Descriptors are shown: *r* = atom distance;  $\phi$  = dihedral angle

| <b>2b</b>                      | <b>r (oMe - oMe)</b> | <b><math>\phi_A</math></b> | <b><math>\phi_B</math></b> | <b>% <i>pop</i></b> |
|--------------------------------|----------------------|----------------------------|----------------------------|---------------------|
| GS1 <i>anti</i>                | 6.70                 | -97.70                     | 109.20                     | 28.96               |
| GS2 <i>anti</i>                | 7.11                 | -96.50                     | 74.00                      | 14.65               |
| GS1 <i>syn</i>                 | 3.49                 | -96.50                     | -108.30                    | 22.55               |
| GS2 <i>syn</i>                 | 5.26                 | -96.70                     | -73.70                     | 33.83               |
| avg. <i>anti</i> vs <i>syn</i> | 7.17 vs 4.53         | -96.8 vs -96.2             | 97.0 vs -87.8              | 44/56               |

### 6.3 Kinetic Study at 120 °C – $^1\text{H}$ NMR

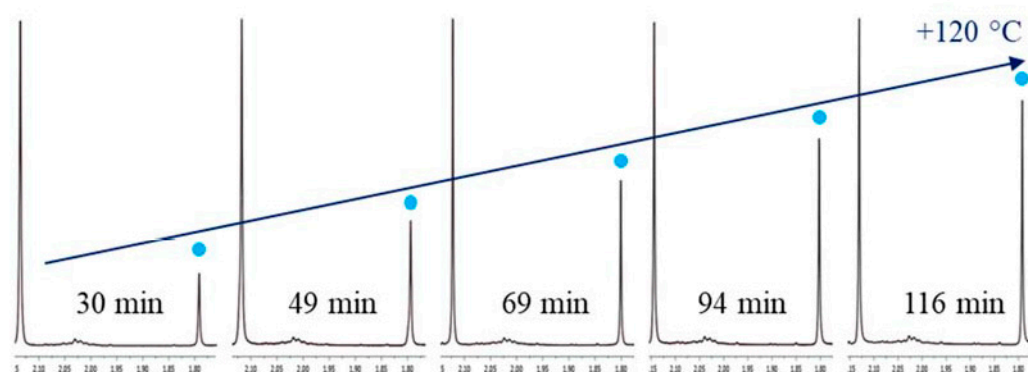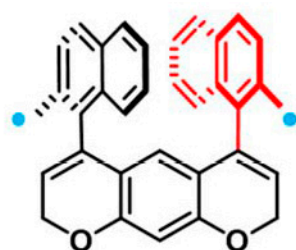

**1b anti**

120 °C

| t (s) | ln (Cx - Cxeq) |
|-------|----------------|
| 0     | -0.7985077     |
| 1800  | -1.27296568    |
| 2940  | -1.66073121    |
| 4140  | -2.04022083    |
| 5640  | -2.40794561    |
| 6960  | -2.81341072    |

$$\Delta G^\ddagger_{120^\circ\text{C}} = 129.3 \text{ kJ/mol}$$

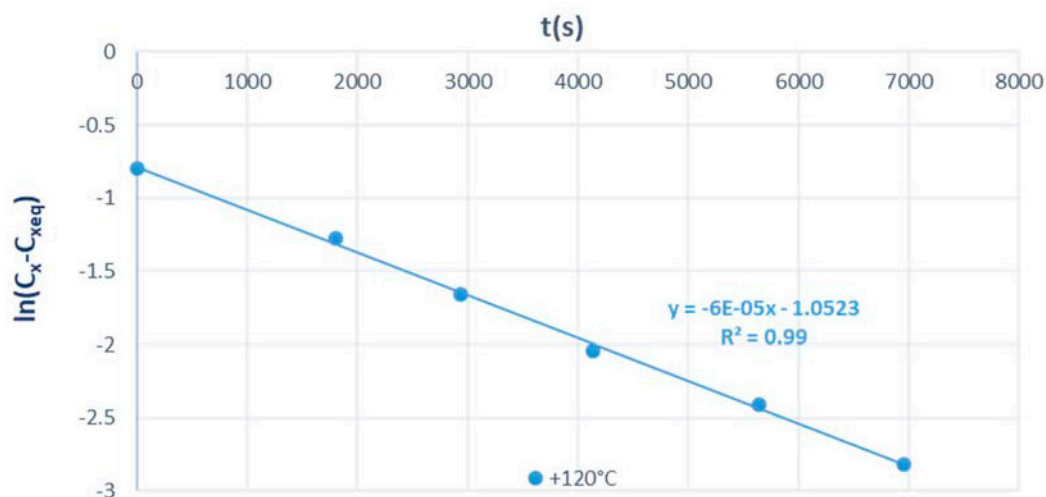

**Figure S16.** Kinetic studies of reversible first-order diastereomerization of **1b**. A sample of the first eluted atropisomer was heated in tube NMR at +120 °C (bath oil) constant temperature in 1,1,2,2-tetrachloroethane- $d_2$ . After cooling at room temperature,  $^1\text{H}$  NMR was acquired at different times and analyzed the integrals of methyl signals to measure the atropisomeric diastereomerization. Xa molar fraction of first eluted atropisomer. Xaeq molar fraction at equilibrium.

#### 6.4 Kinetic off-column of *syn/anti* interconversion of **1b**

Analytical conditions: (S,S)-Whelk-O2 10 micron (250\*4.6 mm L\*ID) by using *n*-hexane/dichloromethane 95/5 + 0.1% ethanol at flow rate of 1.0 mL/min. Detector UV 268 nm.

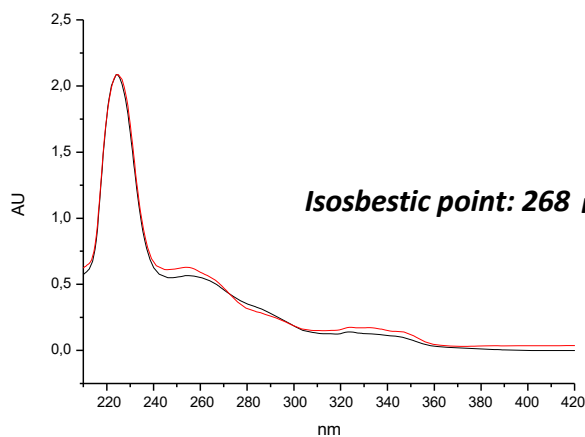

**Figure S17.** Overlapped UV spectra of two *syn/anti* isomers after separation at the same concentration.

**Table S4.** Data related to kinetic at different temperatures.

| T (°C) | K <sub>eq</sub> | k (min <sup>-1</sup> ) | k <sub>-1</sub> (min <sup>-1</sup> ) | ΔG (Kcal/mol) | ΔG (KJ/mol) |
|--------|-----------------|------------------------|--------------------------------------|---------------|-------------|
| 110    | 0,996           | 0,00139                | 0,00140                              | 30,74         | 128,61      |
| 120    | 0,996           | 0,00309                | 0,00310                              | 30,94         | 129,45      |
| 130    | 0,996           | 0,00808                | 0,00811                              | 30,98         | 129,61      |

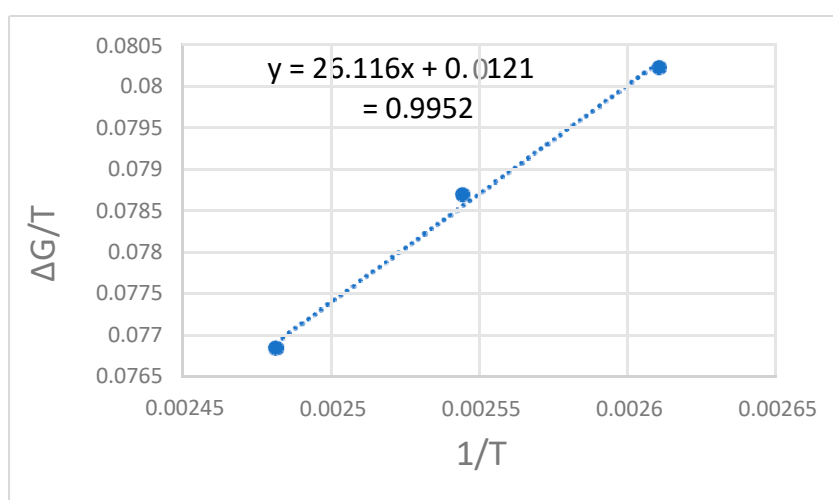

**Figure S18:** Eyring plot of Kinetic off-column of *syn/anti* interconversion of **1b**.

#### 6.4.1 Kinetic study at 110 °C

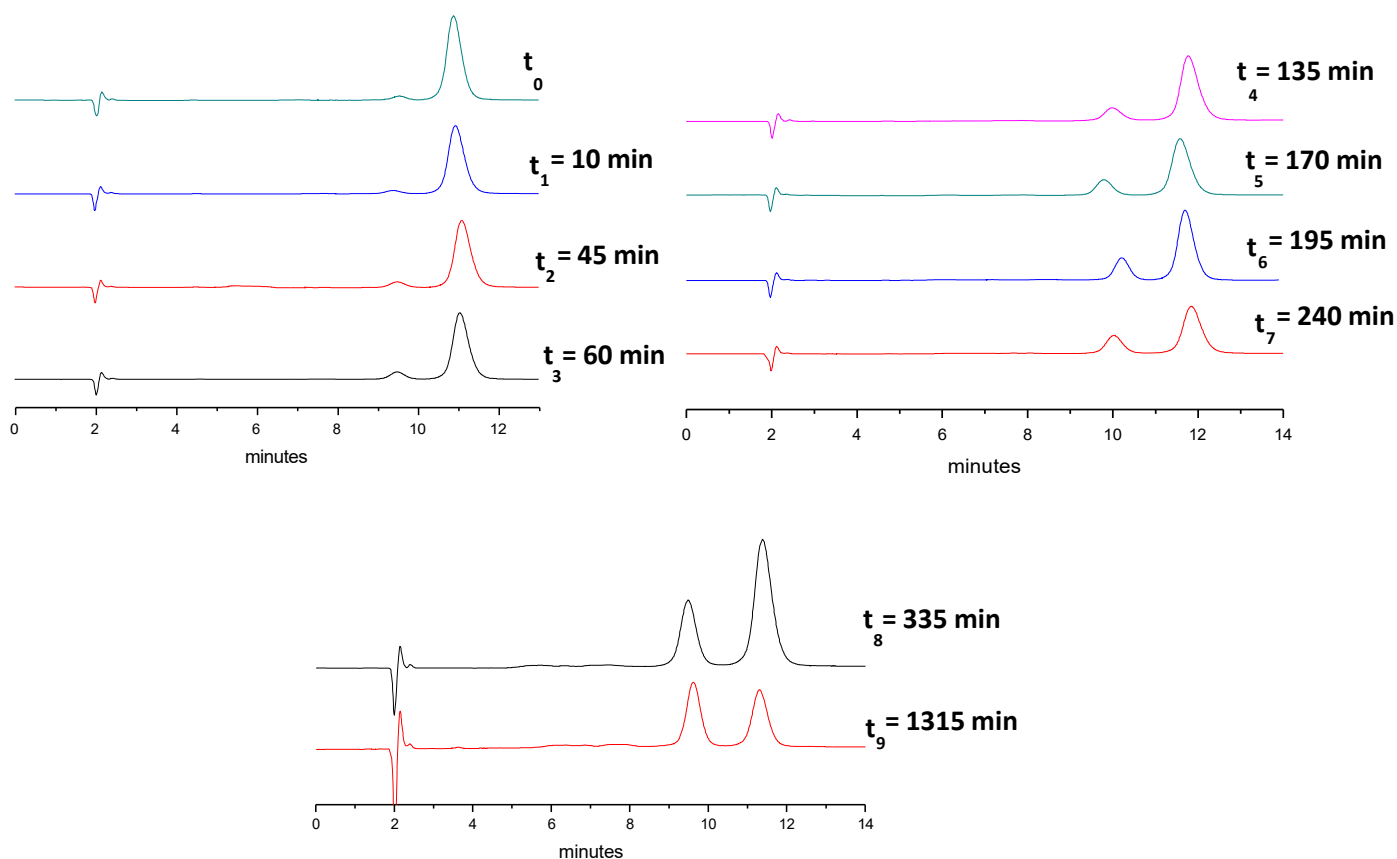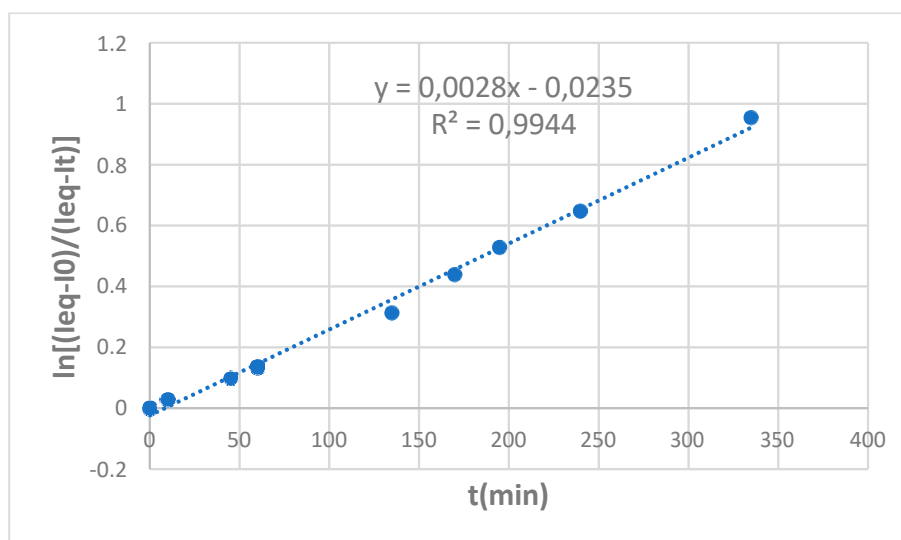

**Figure S19.** Kinetic studies of reversible first-order diastereomerization of **1b**. A sample of the second eluted atropisomer was heated in tube NMR at +110 °C (bath oil) constant temperature in cis/trans decaline. After the time reported the sample was cooled at room temperature and analyzed by HPLC.

# Kinetic study at 120 °C

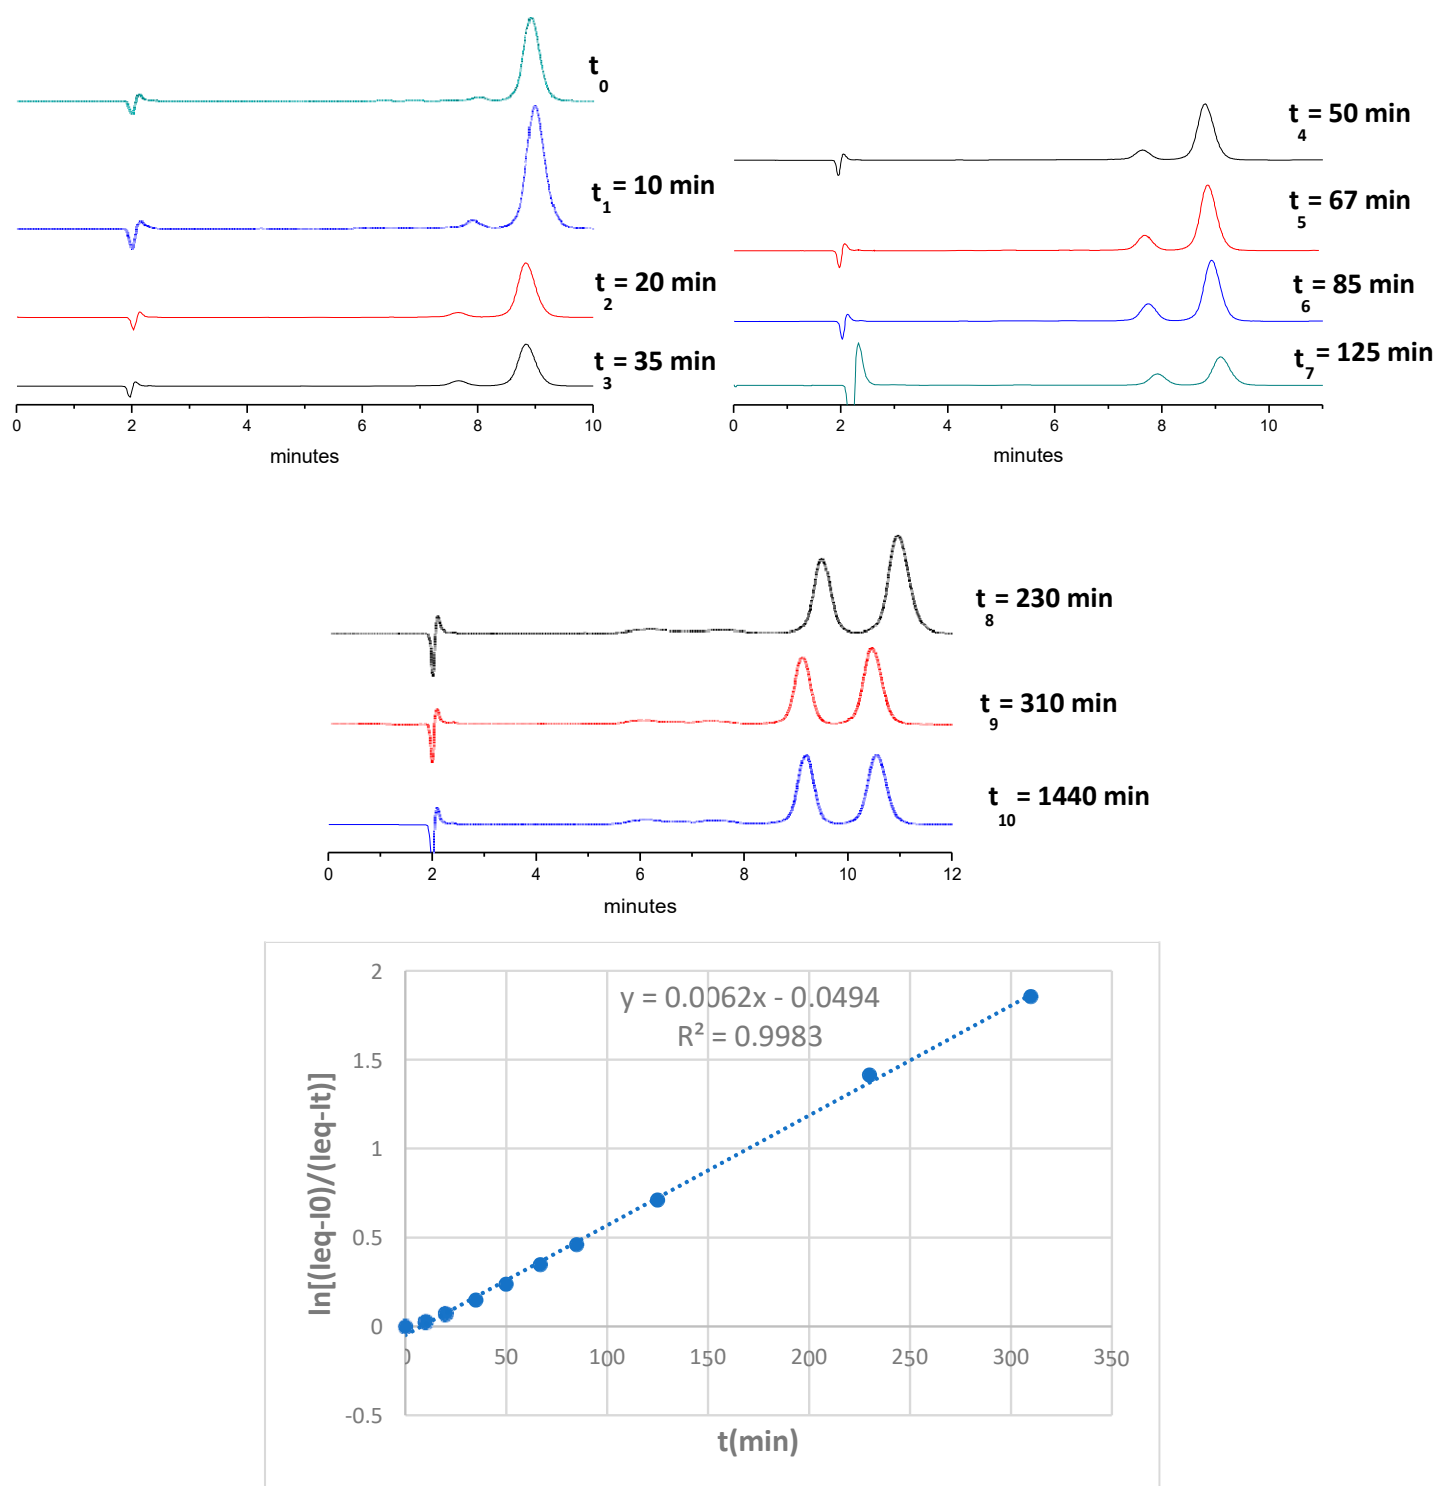

**Figure S20.** Kinetic studies of reversible first-order diastereomerization of **1b**. A sample of the second eluted atropisomer was heated in tube NMR at +120 °C (bath oil) constant temperature in cis/trans decaline. After the time reported the sample was cooled at room temperature and analyzed by HPLC.



#### 6.4.2 Kinetic study at 130 °C

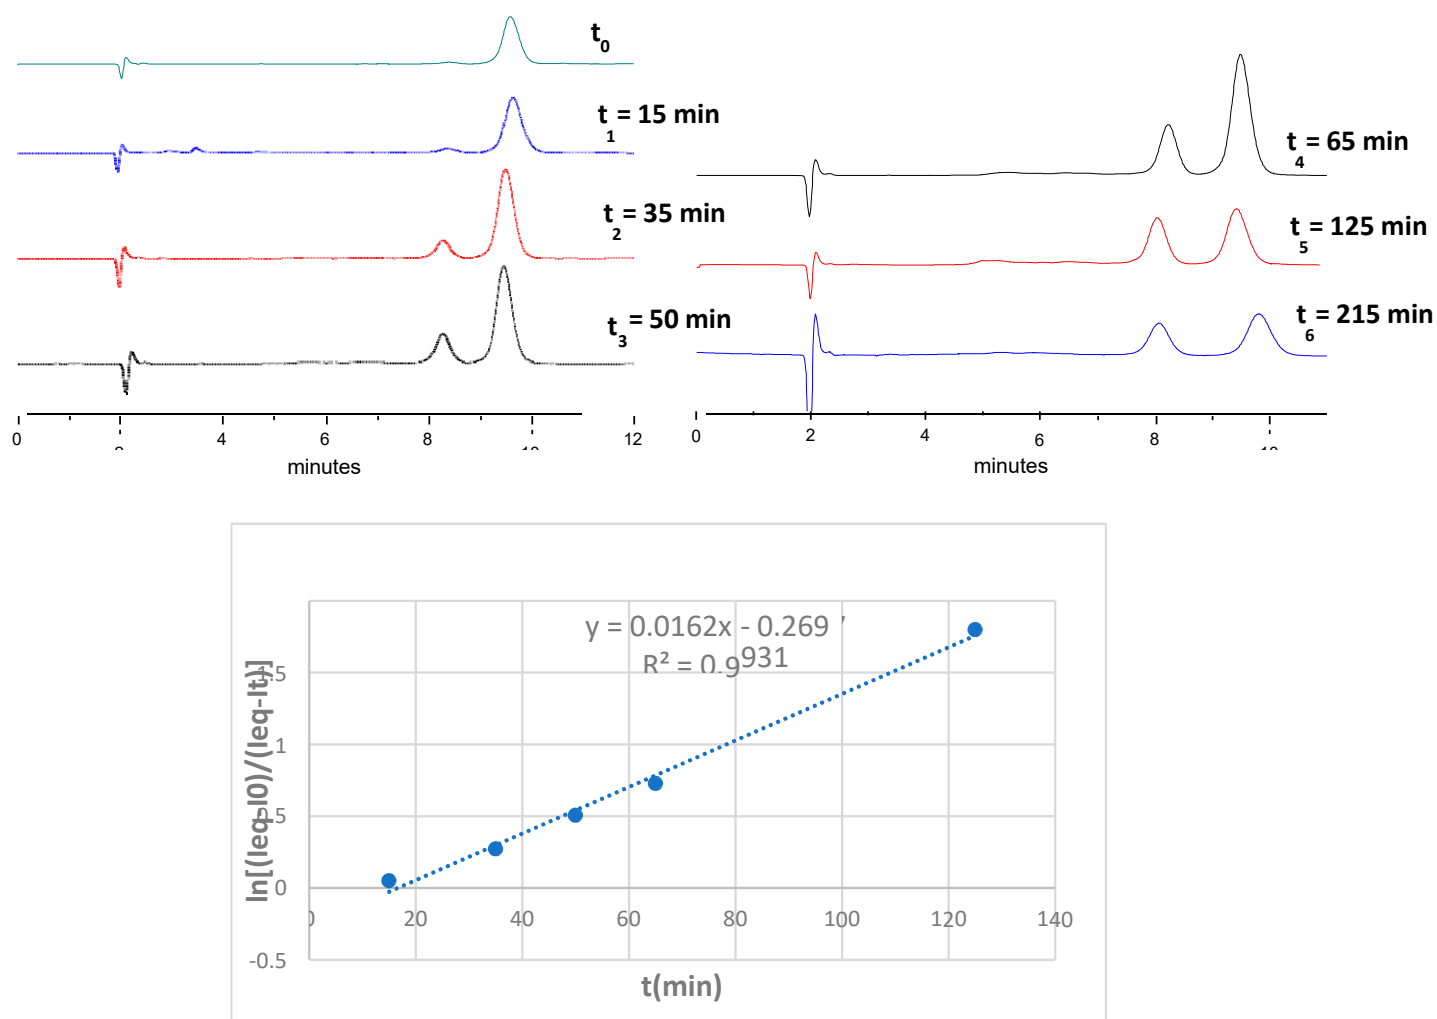

**Figure S21.** Kinetic studies of reversible first-order diastereomerization of **1b**. A sample of the second eluted atropisomer was heated in tube NMR at +110 °C (bath oil) constant temperature in cis/trans decaline. After the time reported the sample was cooled at room temperature and analyzed by HPLC.

## 6.5 ECD of 1b:

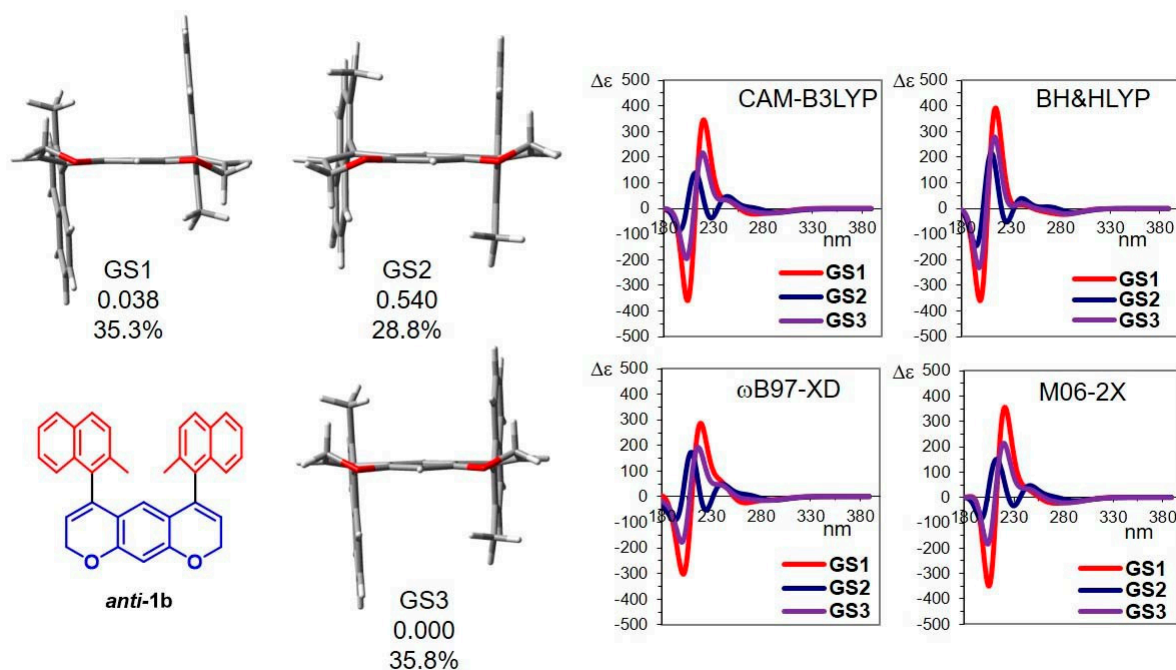

**Figure S22.** ECD studies of compound **anti-1b**. In the Figure was reported all the simulated ECD spectra of GSs with the different functionals and same basis set 6-311++G(2d,p), PCM=acetonitrile. The sum of spectra was reported in the main text.

## 7. Characterization of 2b

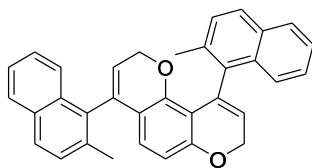

**2b**

*Syn/Anti* stereoisomers were separated by semipreparative CSP-HPLC on Chiralpak IB-N5 (250\*10 mm L\*ID) by using *n*-hexane/chloroform 85/15 at flow rate of 5.0 ml/min. Detector UV 254 nm. *Anti* and *syn* stereoisomers were assigned based on  $^1\text{H}$  NMR and NOE effect.

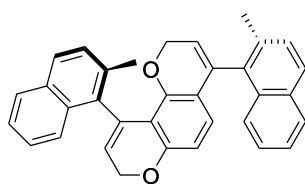

**2b (*anti*)**

**2b (*anti*):**  $^1\text{H}$  NMR (600 MHz) ( $\text{C}_2\text{D}_2\text{Cl}_4$ ):  $\delta$  (ppm) 7.78 – 7.76 (m, 2 H), 7.73 (d,  $J$  = 5.0 Hz, 1 H), 7.67 (d,  $J$  = 5.6 Hz, 2 H), 7.62 (d,  $J$  = 5.5 Hz, 1 H), 7.36 – 7.28 (m, 6 H), 7.26 – 7.24 (m, 2 H), 6.26 (d,  $J$  = 5.6 Hz, 1 H), 6.12 (d,  $J$  = 5.6 Hz, 1 H), 5.66 (t,  $J$  = 2.7 Hz, 1 H), 5.25 (, t,  $J$  = 2.5 Hz, 1 H), 5.25 (s, 1 H), 4.87 – 4.81 (m, 2 H), 3.96 (dd,  $J_1$  = 9.8 Hz,  $J_2$  = 2.6 Hz, 1 H), 3.66 (dd,  $J_1$  = 9.8 Hz,  $J_2$  = 2.4 Hz, 1 H), 2.39 (s, 3 H), 2.16 (s, 3 H);  $^{13}\text{C}\{^1\text{H}\}$  NMR (150 MHz) ( $\text{C}_2\text{D}_2\text{Cl}_4$ ):  $\delta$  (ppm) 155.6, 151.2, 137.4, 134.2, 134.0, 133.8, 132.7, 132.63, 132.60, 132.5, 131.9, 131.8, 128.8, 128.7, 128.0, 127.9, 127.6, 126.6, 126.2, 126.0, 125.9, 125.8, 125.6, 125.1, 124.6, 122.3, 119.7, 118.7, 113.4, 109.1, 65.3, 64.7, 21.0, 20.4.

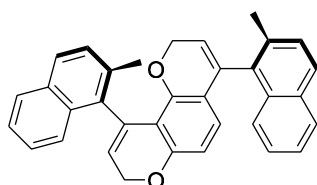

**2b (*syn*)**

**2b (*syn*):**  $^1\text{H}$  NMR (600 MHz) ( $\text{C}_2\text{D}_2\text{Cl}_4$ ):  $\delta$  (ppm) 7.81 – 7.76 (m, 2 H), 7.72 (d,  $J$  = 5.3 Hz, 1 H), 7.67 (d,  $J$  = 5.5 Hz, 2 H), 7.55 (d,  $J$  = 5.6 Hz, 1 H), 7.38 – 7.35 (m, 2 H), 7.33 – 7.29 (m, 3 H), 7.26 – 7.24 (m, 2 H), 6.26 (d,  $J$  = 5.6 Hz, 1 H), 6.12 (d,  $J$  = 5.6 Hz, 1 H), 5.66 (t,  $J$  = 2.7 Hz, 1 H), 5.26 (, t,  $J$  = 2.5 Hz, 1 H), 4.87 – 4.81 (m, 2 H), 3.94 (dd,  $J_1$  = 9.8 Hz,  $J_2$  = 2.6 Hz, 1 H), 3.73 (dd,  $J_1$  = 9.8 Hz,  $J_2$  = 2.5 Hz, 1 H), 2.35 (s, 3 H), 2.21 (s, 3 H);  $^{13}\text{C}\{^1\text{H}\}$  NMR (150 MHz) ( $\text{C}_2\text{D}_2\text{Cl}_4$ ):  $\delta$  (ppm) 155.6, 151.2, 137.4, 134.1, 134.0, 133.8, 132.7, 132.6, 132.5, 131.9, 131.8, 128.8, 128.6, 128.0, 127.9, 127.6, 126.6, 126.2, 126.0, 125.9, 125.6, 125.1, 124.6, 122.3, 119.7, 118.7, 113.4, 109.1, 65.3, 64.7, 20.9, 20.4.

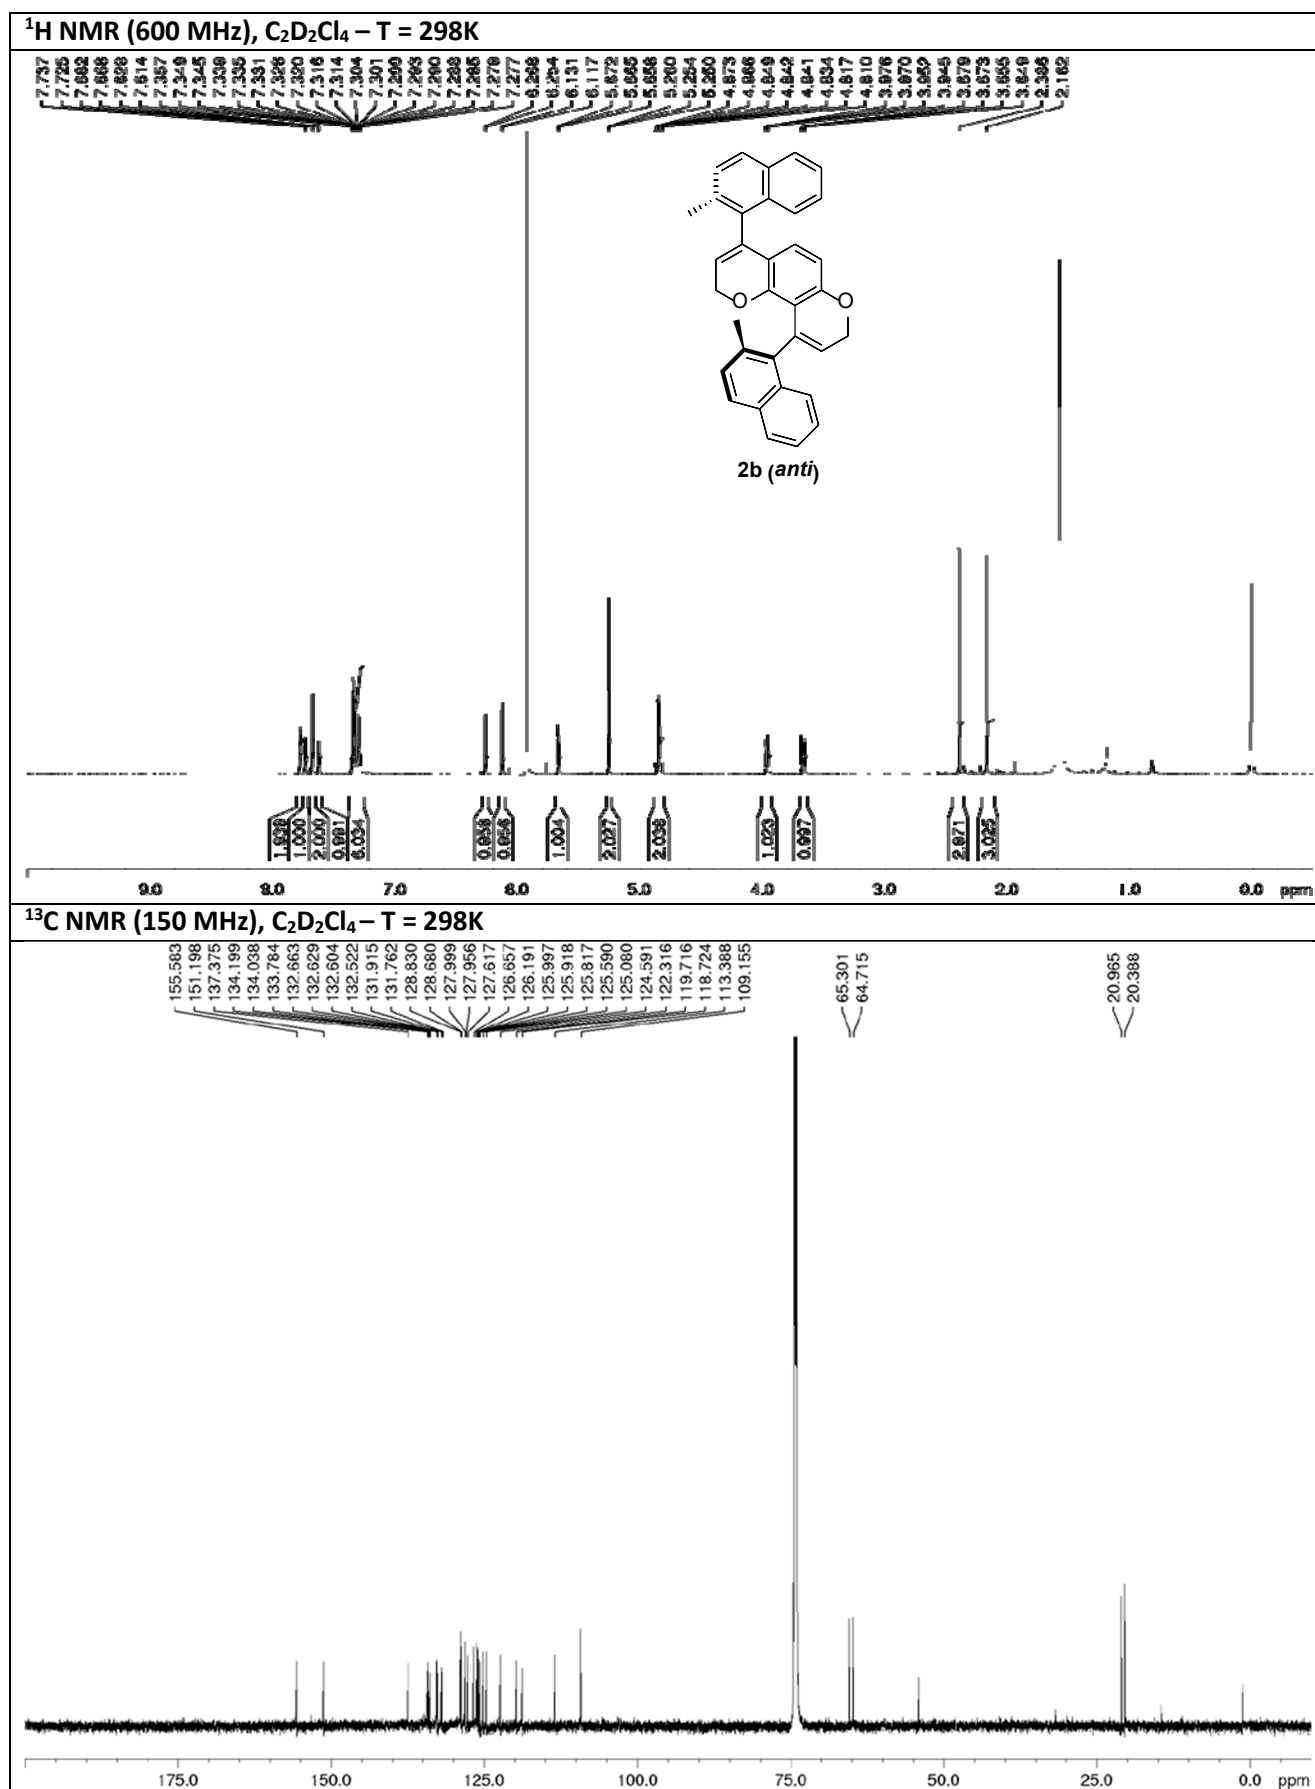

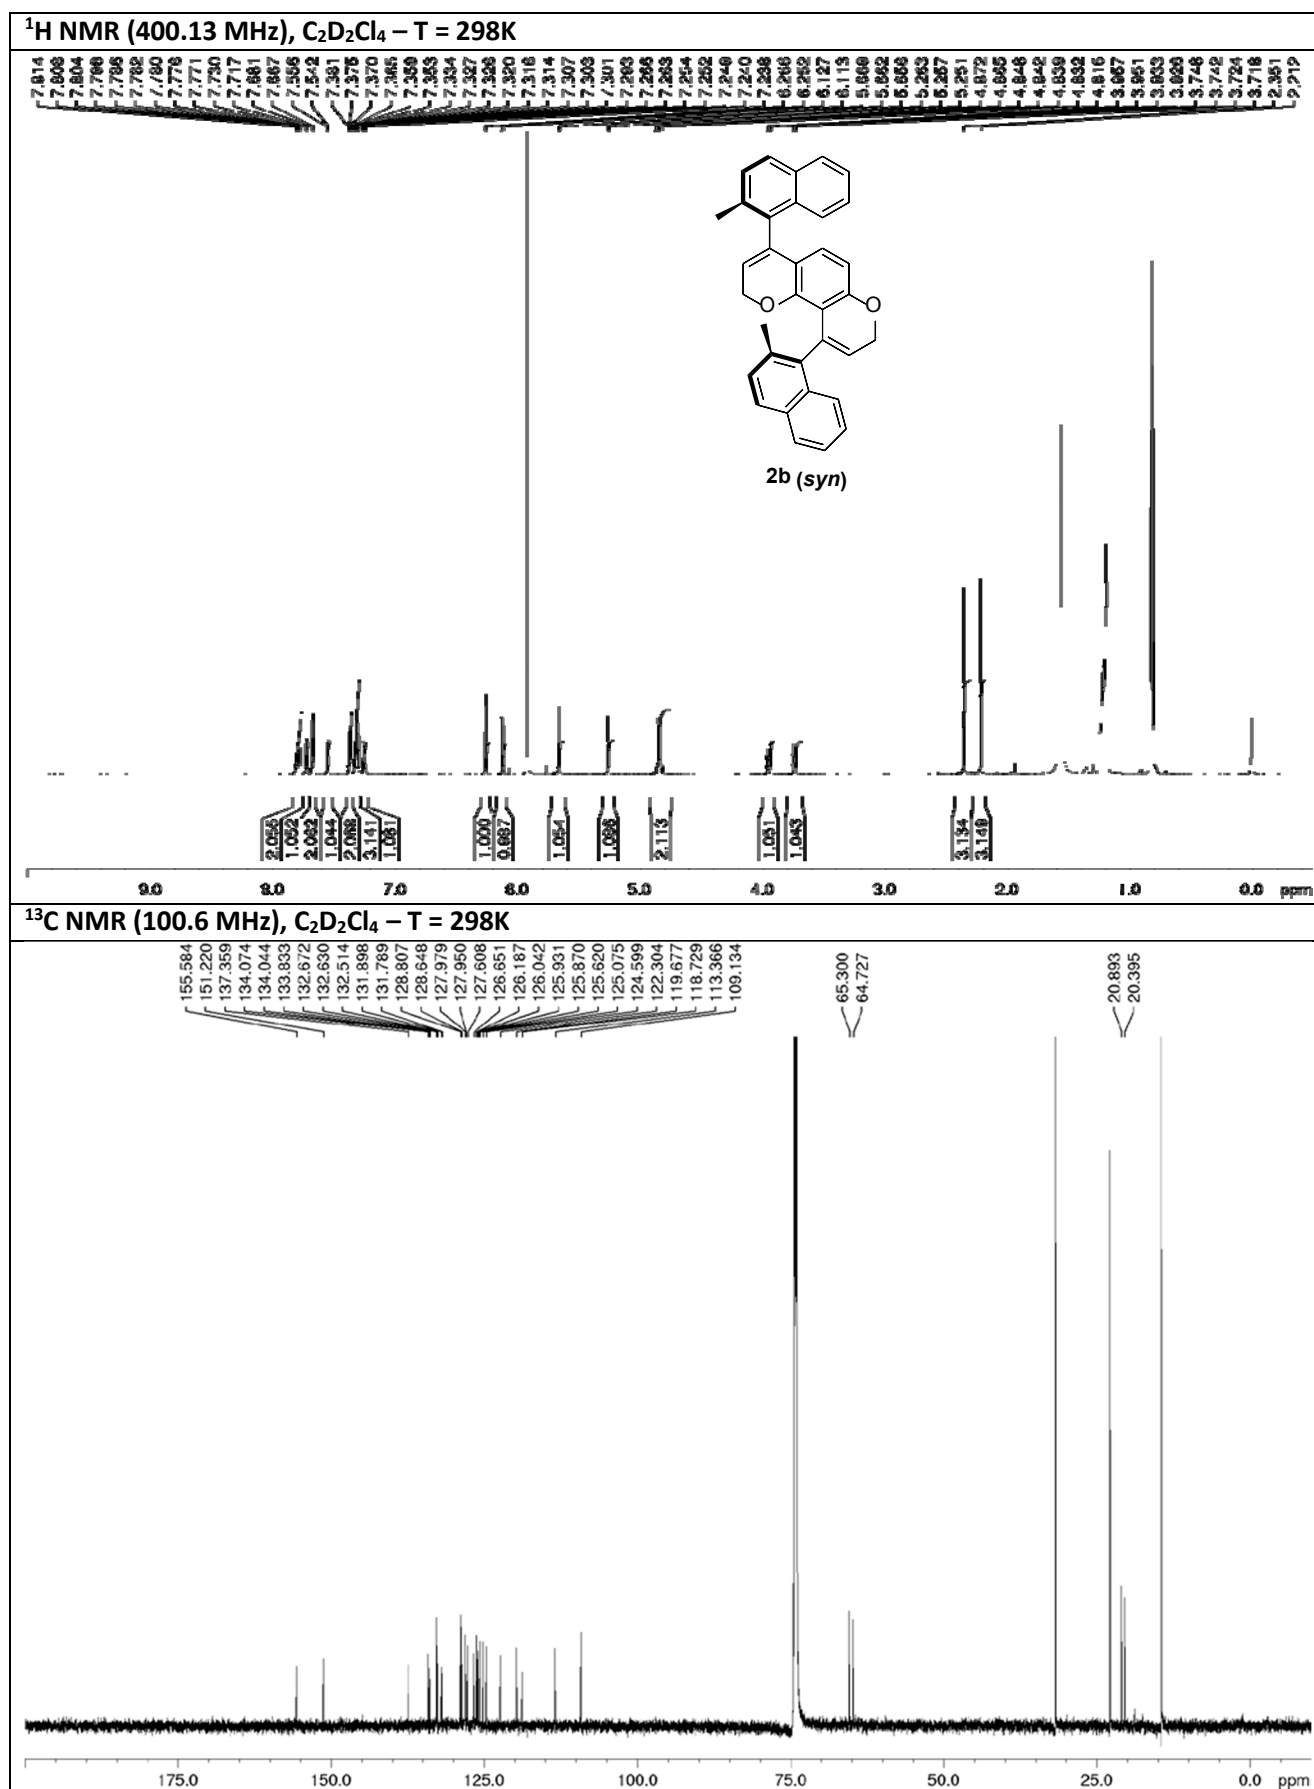

**Figure S24.** <sup>1</sup>H NMR and <sup>13</sup>C NMR spectra of compound **2b (syn)** at +25 °C.

## 7.1 Kinetic Study at 102 °C and 120 °C - <sup>1</sup>H NMR

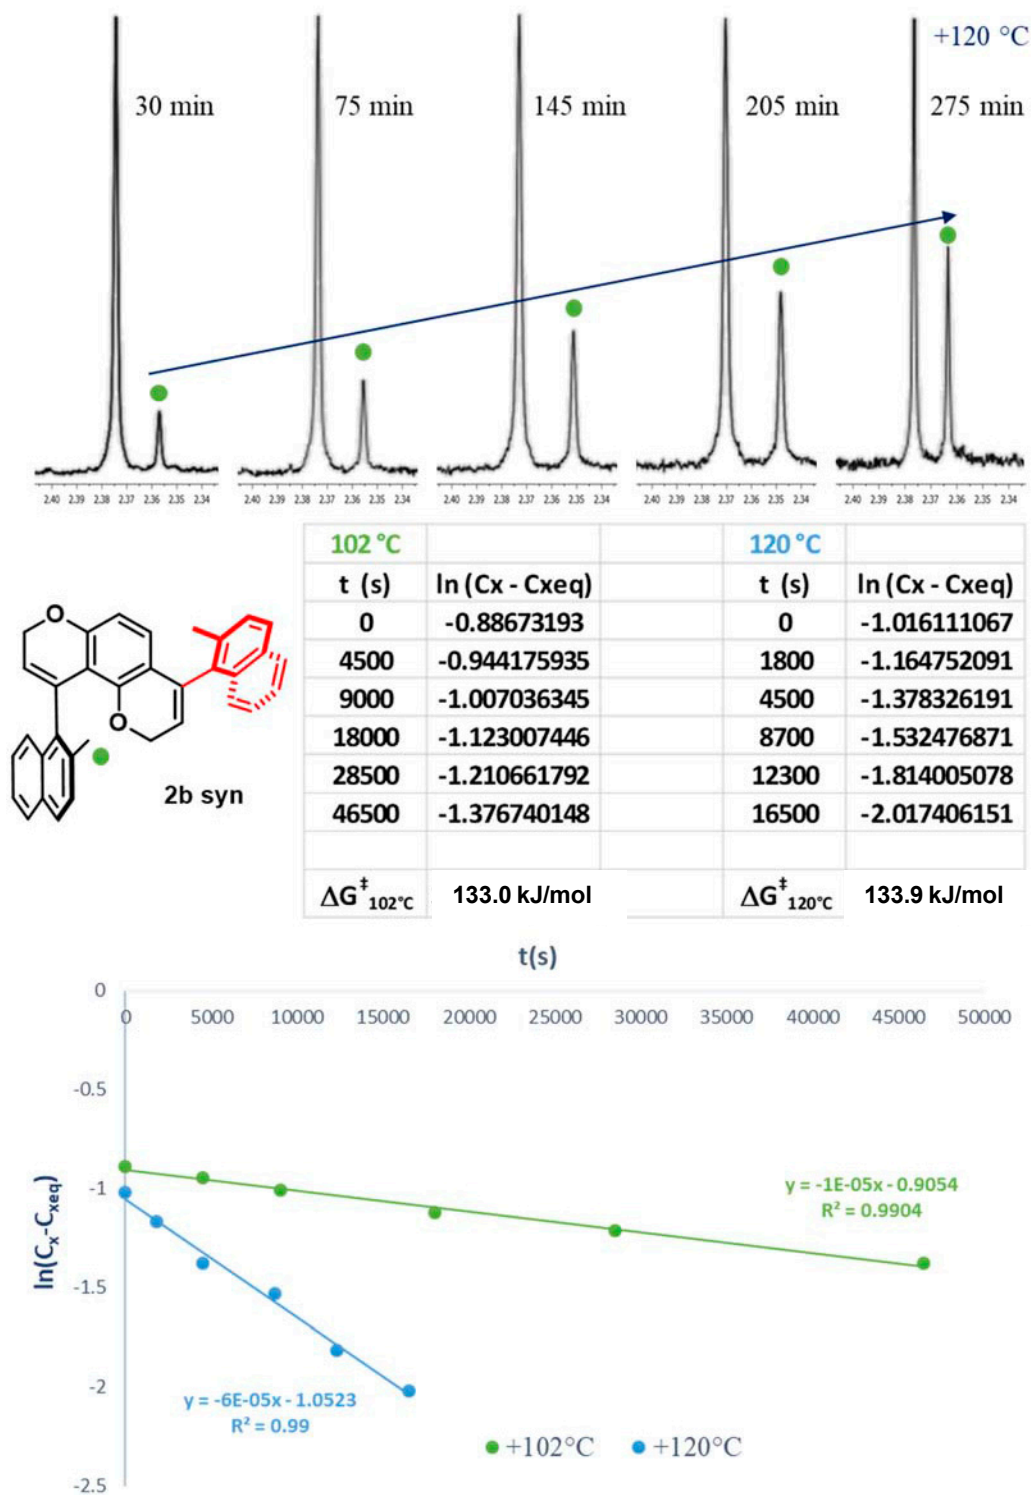

**Figure S25.** Kinetic studies of reversible first-order diastereomerization of **2b**. A sample of the first eluted atropisomer was heated in tube NMR at +102 °C and +120°C (bath oil) constant temperature in 1,1,2,2-tetrachloroethane-d<sub>2</sub>. After cooling at room temperature, <sup>1</sup>H NMR was acquired at different times and analyzed the integrals of methyl signals to measure the atropisomeric diastereomerization. X<sub>a</sub> molar fraction of first eluted atropisomer. X<sub>aeq</sub> molar fraction at equilibrium.

## 7.2 CSP separation and ECD of 2b:

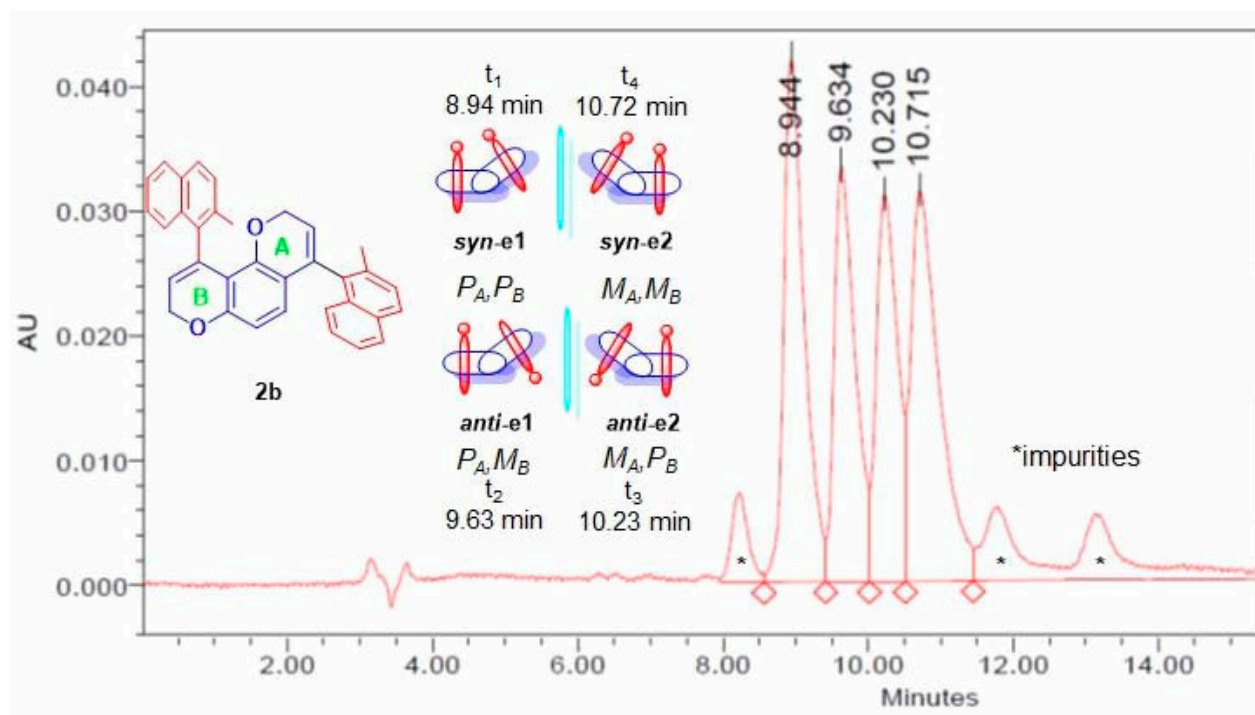

**Figure S26.** CSP-HPLC separation of compound **2b**. Chiralpak IB-N5 column: 5 mm 10 mm I.D. x 250 mm L; eluent 85:15 *n*-hexane/chloroform.

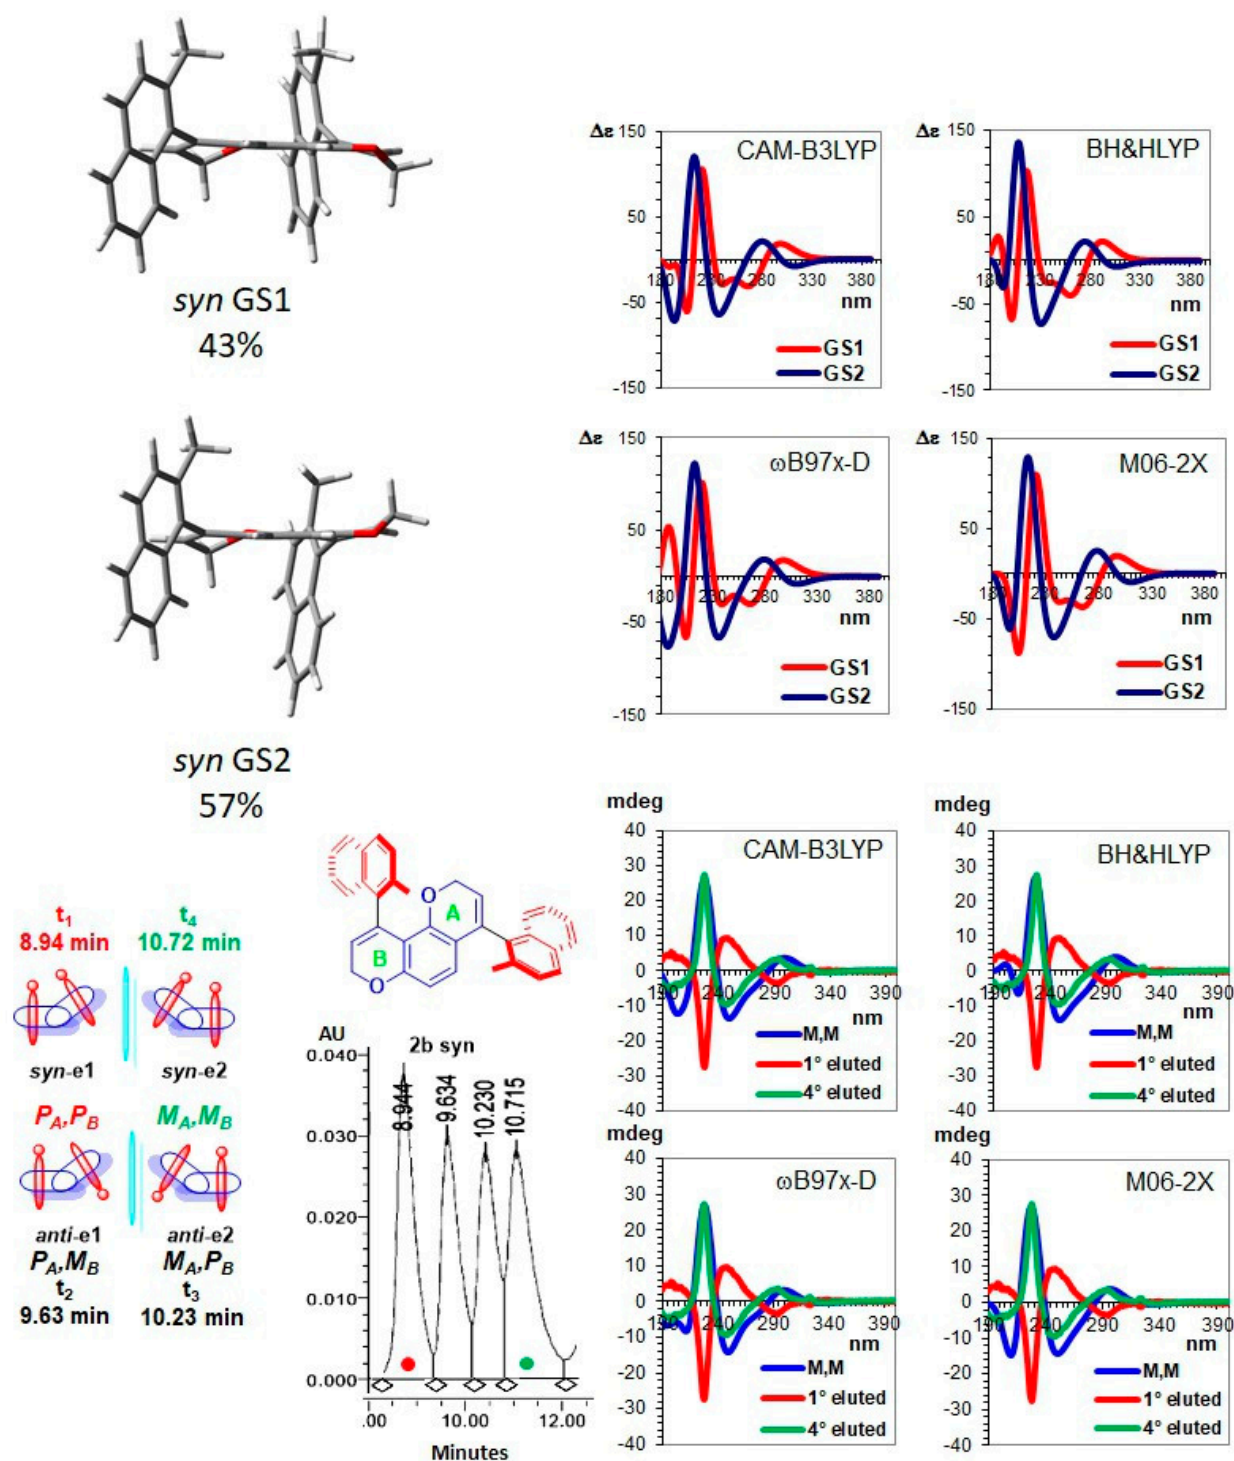

**Figure S27.** ECD studies of compound **syn-2b**. In the Figure was reported all the simulated ECD spectra of GSs with the different functionals and same basis set 6-311++G(2d,p) PCM=acetonitrile. Four different functionals and 6-311++G(2d,p) basis set were used. To obtain a better overlap, the calculated spectra were red-shifted by 11 nm for CAM-B3LYP, 15 nm for BH&HLYP and 12 nm for  $\omega$ B97x-D, and 10 nm for M06-2X while they were multiplied by a factor of 0.28 for all the functionals.



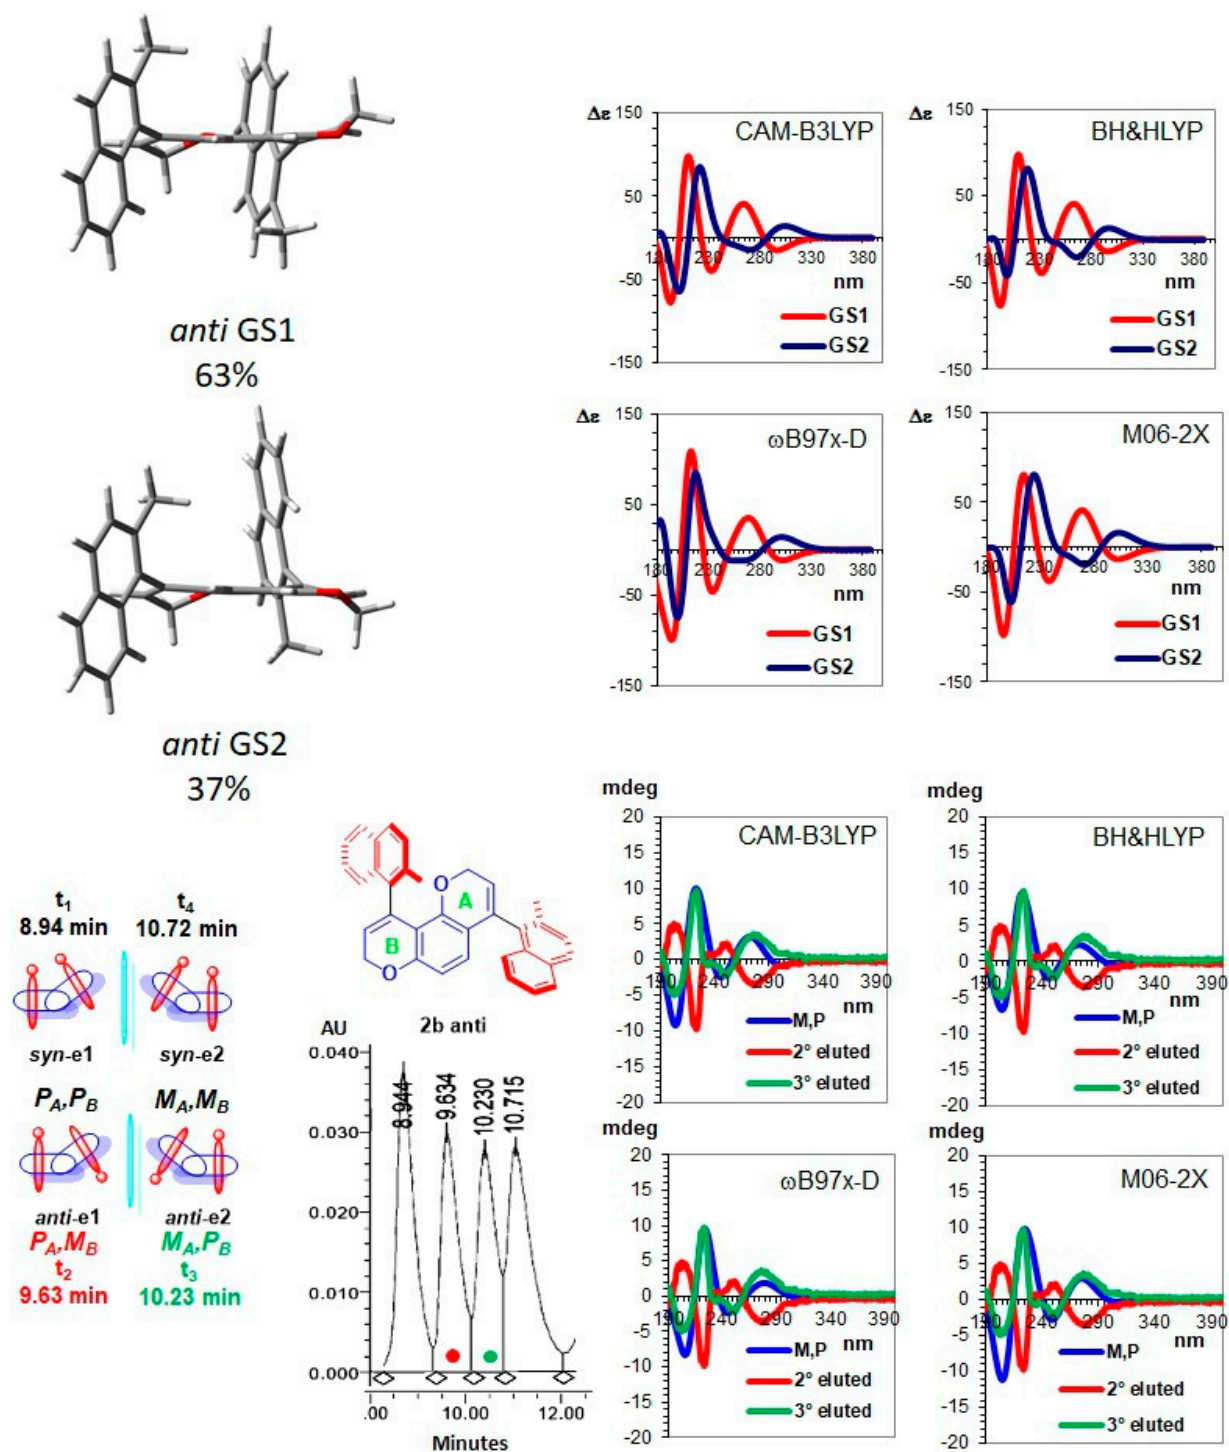

**Figure S28.** ECD studies of compound **anti-2b**. In the Figure was reported all the simulated ECD spectra of GSs with the different functionals and same basis set 6-311++G(2d,p) PCM=acetonitrile. Four different functionals and 6-311++G(2d,p) basis set were used. To obtain a better overlap, the calculated spectra were red-shifted by 10 nm for CAM-B3LYP, 11 nm for BH&HLYP, 9 nm for ωB97x-D, and 7 nm for M06-2X while they were multiplied by a factor of 0.15 for CAM-B3LYP and M06-2X, 0.12 for BH&HLYP and 0.10 for ωB97x-D.

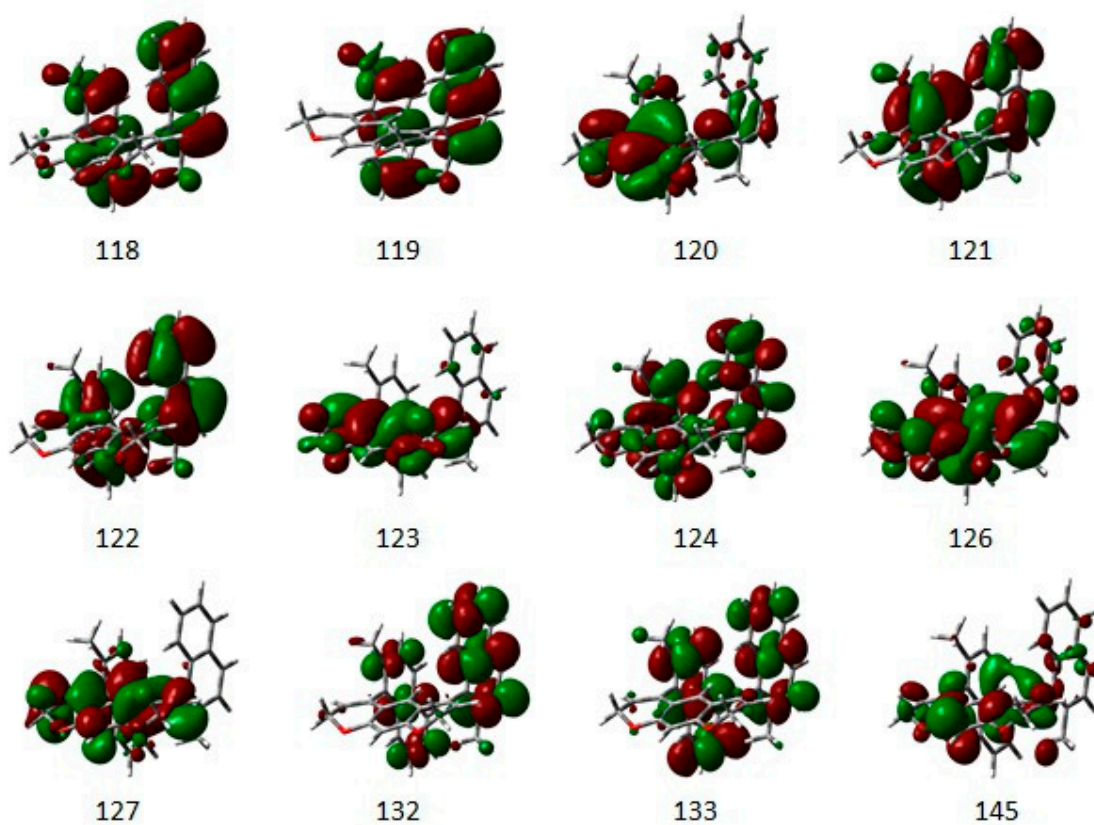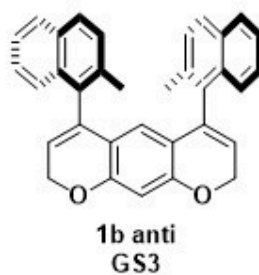

| Excited State | Wavelength (nm) | HOMO | MO | LUMO | %    |
|---------------|-----------------|------|----|------|------|
| 9             | 243.37          | 123  | -> | 127  | 12.3 |
|               |                 | 120  | -> | 126  | 17.7 |
| 14            | 217.65          | 122  | -> | 126  | 23.5 |
|               |                 | 123  | -> | 145  | 15.3 |
| 20            | 211.34          | 120  | -> | 126  | 13.4 |
|               |                 | 122  | -> | 124  | 12.1 |
|               |                 | 123  | -> | 133  | 17.0 |
| 24            | 206.53          | 121  | -> | 126  | 10.8 |
| 33            | 200.42          | 119  | -> | 133  | 20.7 |
|               |                 | 119  | -> | 126  | 16.8 |
|               |                 | 118  | -> | 132  | 13.6 |

**Figure S29.** Homo-Lumo orbitals of best calculated GS3 *anti* conformation of compound **1b**.

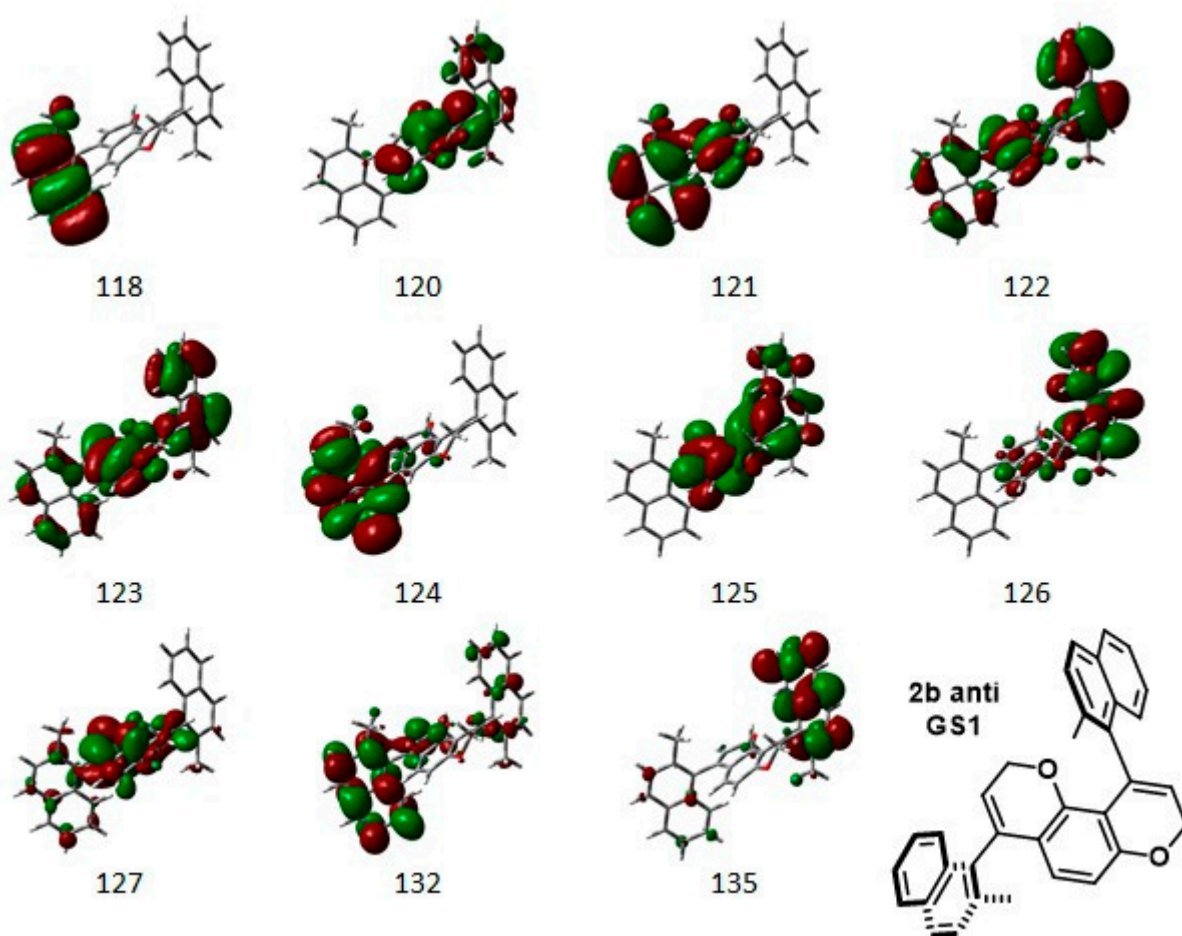

| Excited State | Wavelength (nm) | HOMO | MO | LUMO | %    |
|---------------|-----------------|------|----|------|------|
| 7             | 266.38          | 120  | -> | 125  | 14.1 |
|               |                 | 123  | -> | 127  | 14.8 |
| 13            | 233.6           | 120  | -> | 127  | 19.6 |
|               |                 | 122  | -> | 127  | 27.6 |
| 31            | 208.82          | 121  | -> | 126  | 37.3 |
| 33            | 208.16          | 118  | -> | 124  | 14.8 |
|               |                 | 121  | -> | 126  | 16.2 |
|               |                 | 121  | -> | 132  | 14.7 |
| 42            | 201.49          | 120  | -> | 134  | 11.8 |
|               |                 | 120  | -> | 135  | 16.5 |

**Figure S30.** Homo-Lumo orbitals of best calculated GS1 *anti* conformation of compound **2b**.

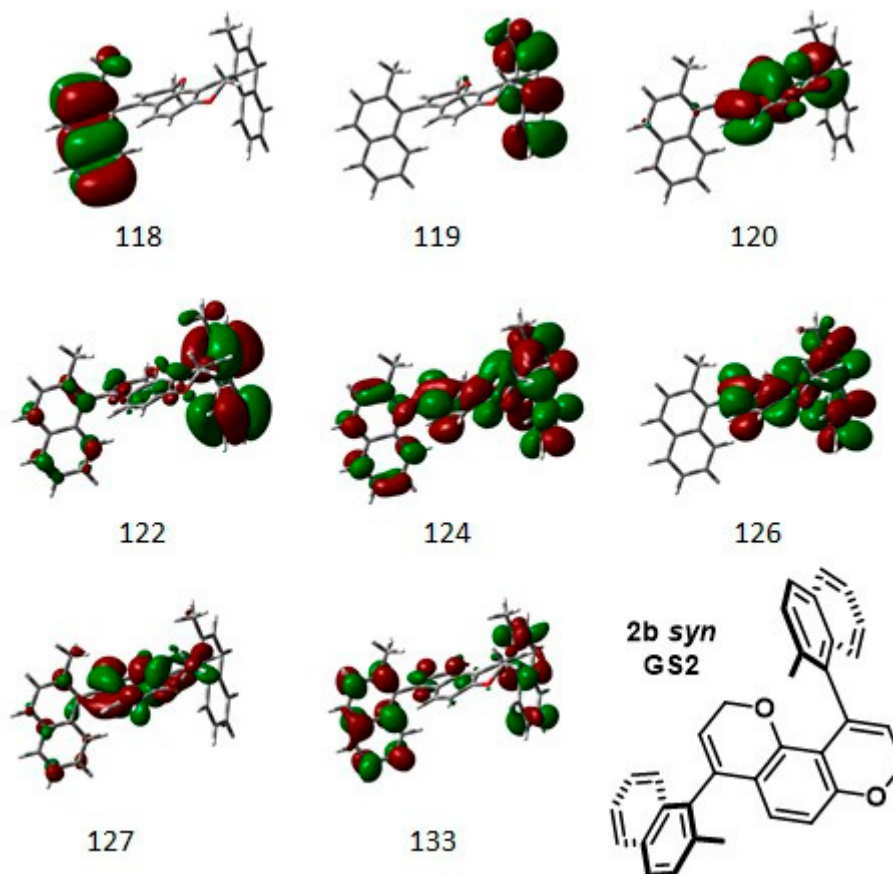

| Excited State | Wavelength (nm) | HOMO | MO | LUMO | %    |
|---------------|-----------------|------|----|------|------|
| 2             | 282.49          | 122  | -> | 124  | 30.9 |
|               |                 | 122  | -> | 125  | 17.3 |
|               |                 | 122  | -> | 126  | 10.5 |
| 14            | 229.63          | 120  | -> | 127  | 16.9 |
|               |                 | 122  | -> | 127  | 19.0 |
| 36            | 206.93          | 119  | -> | 126  | 20.2 |
| 47            | 198.77          | 118  | -> | 129  | 12.2 |
| 61            | 192.9           | 120  | -> | 133  | 13.1 |

**Figure S31.** Homo-Lumo orbitals of best calculated GS1 *syn* conformation of compound **2b**.

## 8. DFT calculations

**Table S4.** Summarizing tables for experimental and calculated populations:

| <b>1a</b>                                       | <b>anti/syn ratio</b> | <b>2a</b>                                     | <b>anti/syn ratio</b> | <b>1b</b>                                     | <b>anti/syn ratio</b> | <b>2b</b>                                     | <b>anti/syn ratio</b> |
|-------------------------------------------------|-----------------------|-----------------------------------------------|-----------------------|-----------------------------------------------|-----------------------|-----------------------------------------------|-----------------------|
| PCM<br>CHCl <sub>3</sub>                        | <b>62:38</b>          | PCM<br>CHCl <sub>3</sub>                      | <b>59:41</b>          | PCM<br>CHCl <sub>3</sub>                      | <b>56:44</b>          | PCM<br>CHCl <sub>3</sub>                      | <b>44:56</b>          |
| <b>C<sub>2</sub>D<sub>2</sub>Cl<sub>4</sub></b> | <b>60:40</b>          | C <sub>2</sub> D <sub>2</sub> Cl <sub>4</sub> | <b>59:41*</b>         | C <sub>2</sub> D <sub>2</sub> Cl <sub>4</sub> | <b>56:44</b>          | C <sub>2</sub> D <sub>2</sub> Cl <sub>4</sub> | <b>51:49</b>          |

**Table S5.** Summarizing tables for experimental and calculated energy barriers (*kJ/mol*):

| <b>1a</b>                                              | <b>Energy barrier</b>             | <b>2a</b>                                              | <b>Energy barrier</b>                                                                | <b>1b</b>                                                                     | <b>Energy barrier</b>              | <b>2b</b>                                                                     | <b>Energy barrier</b>                                                                  |
|--------------------------------------------------------|-----------------------------------|--------------------------------------------------------|--------------------------------------------------------------------------------------|-------------------------------------------------------------------------------|------------------------------------|-------------------------------------------------------------------------------|----------------------------------------------------------------------------------------|
| PCM<br>CHCl <sub>3</sub>                               | <b>TS<sub>1EXT</sub><br/>66.5</b> | PCM<br>CHCl <sub>3</sub>                               | <b>TS<sub>2A-EXT-B-UP</sub><br/>66.5</b><br><b>TS<sub>3A-UP-B-EXT</sub><br/>70.7</b> | PCM<br>CHCl <sub>3</sub>                                                      | <b>TS<sub>2EXT</sub><br/>130.5</b> | PCM<br>CHCl <sub>3</sub>                                                      | <b>TS<sub>1A-INT-B-DO</sub><br/>124.3</b><br><b>TS<sub>4A-DO-B-INT</sub><br/>131.4</b> |
| D-NMR<br>C <sub>2</sub> D <sub>2</sub> Cl <sub>4</sub> | <b>TS<sub>1EXT</sub><br/>65.7</b> | D-NMR<br>C <sub>2</sub> D <sub>2</sub> Cl <sub>4</sub> | <b>TS<sub>2A-EXT-B-UP</sub><br/>15.6</b><br><b>TS<sub>3A-UP-B-EXT</sub><br/>74.1</b> | Kinetic<br><sup>1</sup> HNMR<br>C <sub>2</sub> D <sub>2</sub> Cl <sub>4</sub> | <b>TS<sub>2EXT</sub><br/>129.3</b> | Kinetic<br><sup>1</sup> HNMR<br>C <sub>2</sub> D <sub>2</sub> Cl <sub>4</sub> | <b>TS<sub>A-EXT-B-UP</sub><br/>133.9</b><br><b>/</b>                                   |
| D-HPLC                                                 | <b>/</b>                          | D-HPLC                                                 | <b>/</b><br><b>TS<sub>3A-UP-B-EXT</sub><br/>70.7</b>                                 | Kinetic<br>HPLC<br>cis/trans-decalin                                          | <b>TS<sub>2EXT</sub><br/>129.3</b> | Kinetic<br>HPLC<br>cis/trans-decalin                                          | <b>/</b><br><b>/</b>                                                                   |

**Table S6.** Comparison for calculated **H**, **G** and **qh-G** (free energy after frequency cut-off at 100 *cm*<sup>-1</sup>) in *kJ/mol* at 298K for compound **1a/2a**, PCM (chloroform):

| <b>1a</b>                | <b>H</b>                          | <b>G</b>                          | <b>qh-G(T)</b>                    | <b>2a</b>                | <b>H</b>                                                                             | <b>G</b>                                                                             | <b>qh-G(T)</b>                                                                       |
|--------------------------|-----------------------------------|-----------------------------------|-----------------------------------|--------------------------|--------------------------------------------------------------------------------------|--------------------------------------------------------------------------------------|--------------------------------------------------------------------------------------|
| PCM<br>CHCl <sub>3</sub> | <b>TS<sub>1EXT</sub><br/>66.5</b> | <b>TS<sub>1EXT</sub><br/>77.0</b> | <b>TS<sub>1EXT</sub><br/>72.8</b> | PCM<br>CHCl <sub>3</sub> | <b>TS<sub>2A-EXT-B-UP</sub><br/>65.3</b><br><b>TS<sub>3A-UP-B-EXT</sub><br/>70.7</b> | <b>TS<sub>2A-EXT-B-UP</sub><br/>87.1</b><br><b>TS<sub>3A-UP-B-EXT</sub><br/>80.7</b> | <b>TS<sub>2A-EXT-B-UP</sub><br/>72.0</b><br><b>TS<sub>3A-UP-B-EXT</sub><br/>77.0</b> |
| <b>1a</b>                | <b>anti/syn ratio</b>             | <b>anti/syn ratio</b>             | <b>anti/syn ratio</b>             | <b>2a</b>                | <b>anti/syn ratio</b>                                                                | <b>anti/syn ratio</b>                                                                | <b>anti/syn ratio</b>                                                                |
| PCM<br>CHCl <sub>3</sub> | <b>62:38</b>                      | <b>54:46</b>                      | <b>59:41</b>                      | PCM<br>CHCl <sub>3</sub> | <b>59:41</b>                                                                         | <b>51:49</b>                                                                         | <b>56:44</b>                                                                         |

**Table S7.** Comparison for calculated **H** and **G** in *kJ/mol* at 298K for compound **1a**, with or without empirical dispersion **GD3**, PCM (chloroform):

| <b>1a</b>                | <b>H</b>                                | <b>G</b>                                | <b>1a</b>                | <b>H (GD3)</b>                          | <b>G (GD3)</b>                          |
|--------------------------|-----------------------------------------|-----------------------------------------|--------------------------|-----------------------------------------|-----------------------------------------|
| PCM<br>CHCl <sub>3</sub> | <b>TS<sub>1EXT</sub></b><br><b>76.5</b> | <b>TS<sub>1EXT</sub></b><br><b>77.0</b> | PCM<br>CHCl <sub>3</sub> | <b>TS<sub>1EXT</sub></b><br><b>71.5</b> | <b>TS<sub>1EXT</sub></b><br><b>80.3</b> |

# Compound 1a

1a-anti-GS1

Method: opt freq b3lyp/6-311++g(d,p) scrf(solvent=Chloroform)

SCF Done: E(RB3LYP) = -6223.16714758 A.U. after 1 cycles

Lowest frequency = 9.0786

Zero-point correction= 0.329884  
(Hartree/Particle)  
Thermal correction to Energy= 0.353132  
Thermal correction to Enthalpy= 0.354077  
Thermal correction to Gibbs Free Energy= 0.272168  
Sum of electronic and zero-point Energies= -6222.837263  
Sum of electronic and thermal Energies= -6222.814015  
Sum of electronic and thermal Enthalpies= -6222.813071  
Sum of electronic and thermal Free Energies= -6222.894980

## Standard orientation:

| Center<br>Number | Atomic<br>Number | Atomic<br>Type | Coordinates (Angstroms) |           |           |
|------------------|------------------|----------------|-------------------------|-----------|-----------|
|                  |                  |                | X                       | Y         | Z         |
| 1                | 6                | 0              | -1.169093               | -3.023733 | -0.274260 |
| 2                | 6                | 0              | -1.186404               | -1.613035 | -0.301008 |
| 3                | 6                | 0              | -2.437070               | -0.947400 | -0.698145 |
| 4                | 6                | 0              | -3.560492               | -1.676107 | -0.763889 |
| 5                | 6                | 0              | -0.000024               | -3.725182 | 0.000005  |
| 6                | 6                | 0              | -0.000011               | -0.938320 | -0.000002 |
| 7                | 6                | 0              | 1.186375                | -1.613044 | 0.301008  |
| 8                | 6                | 0              | 1.169051                | -3.023742 | 0.274266  |
| 9                | 6                | 0              | 3.560464                | -1.676135 | 0.763879  |
| 10               | 6                | 0              | 2.437048                | -0.947419 | 0.698140  |
| 11               | 1                | 0              | -0.000029               | -4.807782 | 0.000007  |
| 12               | 1                | 0              | -4.505682               | -1.239106 | -1.064938 |
| 13               | 1                | 0              | -0.000006               | 0.144979  | -0.000005 |
| 14               | 1                | 0              | 4.505659                | -1.239142 | 1.064925  |
| 15               | 8                | 0              | 2.275995                | -3.750505 | 0.601793  |
| 16               | 8                | 0              | -2.276042               | -3.750488 | -0.601784 |
| 17               | 6                | 0              | 3.549875                | -3.118784 | 0.357010  |
| 18               | 1                | 0              | 4.272669                | -3.704595 | 0.924596  |
| 19               | 1                | 0              | 3.790308                | -3.226778 | -0.711883 |
| 20               | 6                | 0              | -3.549919               | -3.118755 | -0.357015 |
| 21               | 1                | 0              | -4.272713               | -3.704560 | -0.924606 |
| 22               | 1                | 0              | -3.790363               | -3.226743 | 0.711875  |
| 23               | 6                | 0              | 2.422761                | 0.498405  | 1.071830  |
| 24               | 6                | 0              | 2.005510                | 0.872617  | 2.358397  |
| 25               | 6                | 0              | 2.809909                | 1.523842  | 0.201270  |
| 26               | 6                | 0              | 1.991588                | 2.203546  | 2.762202  |
| 27               | 1                | 0              | 1.694153                | 0.094349  | 3.045861  |
| 28               | 6                | 0              | 2.800777                | 2.863021  | 0.587913  |
| 29               | 6                | 0              | 2.391138                | 3.201267  | 1.874557  |
| 30               | 1                | 0              | 1.670528                | 2.460020  | 3.764901  |
| 31               | 1                | 0              | 3.109527                | 3.630304  | -0.110073 |
| 32               | 1                | 0              | 2.384692                | 4.242092  | 2.176711  |
| 33               | 6                | 0              | -2.422771               | 0.498424  | -1.071838 |
| 34               | 6                | 0              | -2.809886               | 1.523866  | -0.201270 |

|    |    |   |           |          |           |
|----|----|---|-----------|----------|-----------|
| 35 | 6  | 0 | -2.005539 | 0.872629 | -2.358412 |
| 36 | 6  | 0 | -2.800740 | 2.863045 | -0.587912 |
| 37 | 6  | 0 | -1.991605 | 2.203559 | -2.762217 |
| 38 | 1  | 0 | -1.694209 | 0.094356 | -3.045883 |
| 39 | 6  | 0 | -2.391121 | 3.201285 | -1.874564 |
| 40 | 1  | 0 | -3.109466 | 3.630333 | 0.110080  |
| 41 | 1  | 0 | -1.670561 | 2.460028 | -3.764922 |
| 42 | 1  | 0 | -2.384664 | 4.242110 | -2.176717 |
| 43 | 35 | 0 | 3.369943  | 1.124771 | -1.599338 |
| 44 | 35 | 0 | -3.369897 | 1.124800 | 1.599346  |

-----  
1a-anti-GS2

Method: opt freq b3lyp/6-311++g(d,p) scrf(solvent=Chloroform)  
 SCF Done: E(RB3LYP) = -6223.16804199 A.U. after 1 cycles  
 Lowest frequency = 14.9143

Zero-point correction= 0.329951  
 (Hartree/Particle)  
 Thermal correction to Energy= 0.353111  
 Thermal correction to Enthalpy= 0.354055  
 Thermal correction to Gibbs Free Energy= 0.273376  
 Sum of electronic and zero-point Energies= -6222.838091  
 Sum of electronic and thermal Energies= -6222.814931  
 Sum of electronic and thermal Enthalpies= -6222.813987  
 Sum of electronic and thermal Free Energies= -6222.894666

Standard orientation:

| Center<br>Number | Atomic<br>Number | Atomic<br>Type | Coordinates (Angstroms) |           |           |
|------------------|------------------|----------------|-------------------------|-----------|-----------|
|                  |                  |                | X                       | Y         | Z         |
| 1                | 6                | 0              | 1.036926                | 2.675414  | 0.604372  |
| 2                | 6                | 0              | 1.071880                | 1.265473  | 0.588527  |
| 3                | 6                | 0              | 2.254591                | 0.600835  | 1.159110  |
| 4                | 6                | 0              | 3.087411                | 1.322691  | 1.924111  |
| 5                | 6                | 0              | 0.000011                | 3.377796  | -0.000010 |
| 6                | 6                | 0              | -0.000003               | 0.590178  | 0.000015  |
| 7                | 6                | 0              | -1.071878               | 1.265473  | -0.588508 |
| 8                | 6                | 0              | -1.036913               | 2.675413  | -0.604377 |
| 9                | 6                | 0              | -3.087418               | 1.322688  | -1.924082 |
| 10               | 6                | 0              | -2.254589               | 0.600834  | -1.159092 |
| 11               | 1                | 0              | 0.000015                | 4.460375  | -0.000018 |
| 12               | 1                | 0              | 3.978708                | 0.888062  | 2.362071  |
| 13               | 1                | 0              | -0.000008               | -0.493366 | 0.000023  |
| 14               | 1                | 0              | -3.978706               | 0.888049  | -2.362053 |
| 15               | 8                | 0              | -2.063069               | 3.398707  | -1.139188 |
| 16               | 8                | 0              | 2.063091                | 3.398701  | 1.139178  |
| 17               | 6                | 0              | -2.789074               | 2.764142  | -2.211830 |
| 18               | 1                | 0              | -3.701361               | 3.349486  | -2.324663 |
| 19               | 1                | 0              | -2.201880               | 2.869443  | -3.137110 |
| 20               | 6                | 0              | 2.789029                | 2.764137  | 2.211867  |
| 21               | 1                | 0              | 3.701297                | 3.349496  | 2.324775  |
| 22               | 1                | 0              | 2.201761                | 2.869414  | 3.137101  |
| 23               | 6                | 0              | -2.499575               | -0.849395 | -0.909393 |
| 24               | 6                | 0              | -2.281014               | -1.768952 | -1.946442 |
| 25               | 6                | 0              | -2.951196               | -1.361616 | 0.314433  |
| 26               | 6                | 0              | -2.499320               | -3.132800 | -1.771691 |
| 27               | 1                | 0              | -1.927069               | -1.393993 | -2.899794 |
| 28               | 6                | 0              | -3.175984               | -2.722299 | 0.506412  |



|    |    |   |           |           |           |
|----|----|---|-----------|-----------|-----------|
| 29 | 6  | 0 | -2.944811 | -3.610661 | -0.541694 |
| 30 | 1  | 0 | -2.320285 | -3.817322 | -2.592507 |
| 31 | 1  | 0 | -3.534600 | -3.082187 | 1.462072  |
| 32 | 1  | 0 | -3.118573 | -4.669924 | -0.391953 |
| 33 | 6  | 0 | 2.499593  | -0.849387 | 0.909396  |
| 34 | 6  | 0 | 2.951192  | -1.361600 | -0.314442 |
| 35 | 6  | 0 | 2.281074  | -1.768952 | 1.946448  |
| 36 | 6  | 0 | 3.175995  | -2.722279 | -0.506430 |
| 37 | 6  | 0 | 2.499395  | -3.132796 | 1.771688  |
| 38 | 1  | 0 | 1.927147  | -1.394000 | 2.899810  |
| 39 | 6  | 0 | 2.944860  | -3.610647 | 0.541679  |
| 40 | 1  | 0 | 3.534595  | -3.082159 | -1.462099 |
| 41 | 1  | 0 | 2.320391  | -3.817322 | 2.592507  |
| 42 | 1  | 0 | 3.118634  | -4.669907 | 0.391930  |
| 43 | 35 | 0 | -3.335373 | -0.180520 | 1.785634  |
| 44 | 35 | 0 | 3.335335  | -0.180495 | -1.785646 |

-----  
1a-anti-GS3

Method: opt freq b3lyp/6-311++g(d,p) scrf(solvent=Chloroform)  
SCF Done: E(RB3LYP) = -6223.16765424 A.U. after 1 cycles  
Lowest frequency = 12.5752

Zero-point correction= 0.329927  
(Hartree/Particle)  
Thermal correction to Energy= 0.353124  
Thermal correction to Enthalpy= 0.354068  
Thermal correction to Gibbs Free Energy= 0.273025  
Sum of electronic and zero-point Energies= -6222.837727  
Sum of electronic and thermal Energies= -6222.814530  
Sum of electronic and thermal Enthalpies= -6222.813586  
Sum of electronic and thermal Free Energies= -6222.894629

Standard orientation:

| Center<br>Number | Atomic<br>Number | Atomic<br>Type | Coordinates (Angstroms) |           |           |
|------------------|------------------|----------------|-------------------------|-----------|-----------|
|                  |                  |                | X                       | Y         | Z         |
| 1                | 6                | 0              | 1.400465                | 2.781356  | -0.358276 |
| 2                | 6                | 0              | 1.260627                | 1.390724  | -0.547058 |
| 3                | 6                | 0              | 2.422864                | 0.646501  | -1.058583 |
| 4                | 6                | 0              | 3.437451                | 1.337689  | -1.599572 |
| 5                | 6                | 0              | 0.374296                | 3.541269  | 0.192422  |
| 6                | 6                | 0              | 0.046112                | 0.800422  | -0.189385 |
| 7                | 6                | 0              | -1.014481               | 1.538797  | 0.342306  |
| 8                | 6                | 0              | -0.827688               | 2.925450  | 0.524852  |
| 9                | 6                | 0              | -3.296081               | 1.771123  | 1.114792  |
| 10               | 6                | 0              | -2.285506               | 0.950727  | 0.793597  |
| 11               | 1                | 0              | 0.503287                | 4.605195  | 0.345105  |
| 12               | 1                | 0              | 4.322767                | 0.842901  | -1.982380 |
| 13               | 1                | 0              | -0.069912               | -0.270123 | -0.308613 |
| 14               | 1                | 0              | -4.247917               | 1.390480  | 1.467229  |
| 15               | 8                | 0              | -1.792835               | 3.699679  | 1.099051  |
| 16               | 8                | 0              | 2.572823                | 3.416387  | -0.647453 |
| 17               | 6                | 0              | -3.154314               | 3.252285  | 0.932103  |
| 18               | 1                | 0              | -3.499736               | 3.559477  | -0.067033 |
| 19               | 1                | 0              | -3.730377               | 3.808013  | 1.671817  |
| 20               | 6                | 0              | 3.361444                | 2.831921  | -1.704652 |
| 21               | 1                | 0              | 4.345132                | 3.292316  | -1.615293 |
| 22               | 1                | 0              | 2.929333                | 3.139728  | -2.669305 |

|    |    |   |           |           |           |
|----|----|---|-----------|-----------|-----------|
| 23 | 6  | 0 | -2.411289 | -0.530334 | 0.942051  |
| 24 | 6  | 0 | -2.022452 | -1.138433 | 2.145125  |
| 25 | 6  | 0 | -2.908825 | -1.364856 | -0.065505 |
| 26 | 6  | 0 | -2.137786 | -2.511472 | 2.338004  |
| 27 | 1  | 0 | -1.627400 | -0.510782 | 2.935682  |
| 28 | 6  | 0 | -3.030010 | -2.742163 | 0.108936  |
| 29 | 6  | 0 | -2.642877 | -3.315017 | 1.317404  |
| 30 | 1  | 0 | -1.834676 | -2.951093 | 3.280961  |
| 31 | 1  | 0 | -3.423339 | -3.357015 | -0.690145 |
| 32 | 1  | 0 | -2.737830 | -4.385831 | 1.455355  |
| 33 | 6  | 0 | 2.452599  | -0.843866 | -0.995512 |
| 34 | 6  | 0 | 2.679273  | -1.566248 | 0.183701  |
| 35 | 6  | 0 | 2.254204  | -1.583263 | -2.171312 |
| 36 | 6  | 0 | 2.708039  | -2.958284 | 0.201499  |
| 37 | 6  | 0 | 2.278445  | -2.975262 | -2.171605 |
| 38 | 1  | 0 | 2.072658  | -1.043746 | -3.093689 |
| 39 | 6  | 0 | 2.503167  | -3.664045 | -0.982104 |
| 40 | 1  | 0 | 2.895323  | -3.483935 | 1.128839  |
| 41 | 1  | 0 | 2.120916  | -3.517430 | -3.096592 |
| 42 | 1  | 0 | 2.524315  | -4.747562 | -0.968185 |
| 43 | 35 | 0 | -3.457665 | -0.630776 | -1.760868 |
| 44 | 35 | 0 | 3.015707  | -0.647774 | 1.841842  |

-----  
1a-syn-GS1

Method: opt freq b3lyp/6-311++g(d,p) scrf(solvent=Chloroform)

SCF Done: E(RB3LYP) = -6223.16728046 A.U. after 1 cycles

Lowest frequency = 7.8333

Zero-point correction= 0.329911  
(Hartree/Particle)  
Thermal correction to Energy= 0.353119  
Thermal correction to Enthalpy= 0.354063  
Thermal correction to Gibbs Free Energy= 0.272494  
Sum of electronic and zero-point Energies= -6222.837369  
Sum of electronic and thermal Energies= -6222.814162  
Sum of electronic and thermal Enthalpies= -6222.813218  
Sum of electronic and thermal Free Energies= -6222.894786

Standard orientation:

| Center<br>Number | Atomic<br>Number | Atomic<br>Type | Coordinates (Angstroms) |           |           |
|------------------|------------------|----------------|-------------------------|-----------|-----------|
|                  |                  |                | X                       | Y         | Z         |
| 1                | 6                | 0              | 1.774108                | 2.668183  | 0.401340  |
| 2                | 6                | 0              | 1.521173                | 1.298693  | 0.624990  |
| 3                | 6                | 0              | 2.676225                | 0.414261  | 0.849166  |
| 4                | 6                | 0              | 3.864545                | 0.971261  | 1.127000  |
| 5                | 6                | 0              | 0.744633                | 3.550701  | 0.093400  |
| 6                | 6                | 0              | 0.194441                | 0.862589  | 0.584842  |
| 7                | 6                | 0              | -0.866349               | 1.728447  | 0.304600  |
| 8                | 6                | 0              | -0.562360               | 3.079311  | 0.032241  |
| 9                | 6                | 0              | -3.196402               | 2.185179  | -0.159546 |
| 10               | 6                | 0              | -2.283852               | 1.334446  | 0.331685  |
| 11               | 1                | 0              | 0.958171                | 4.595115  | -0.095336 |
| 12               | 1                | 0              | 4.750709                | 0.368867  | 1.291205  |
| 13               | 1                | 0              | -0.019293               | -0.182163 | 0.776221  |
| 14               | 1                | 0              | -4.255276               | 1.953892  | -0.148314 |
| 15               | 8                | 0              | -1.548980               | 3.989483  | -0.211060 |
| 16               | 8                | 0              | 3.047686                | 3.157823  | 0.399346  |

|    |    |   |           |           |           |
|----|----|---|-----------|-----------|-----------|
| 17 | 6  | 0 | -2.761087 | 3.470185  | -0.797131 |
| 18 | 1  | 0 | -3.501903 | 4.258593  | -0.666109 |
| 19 | 1  | 0 | -2.594014 | 3.336676  | -1.876953 |
| 20 | 6  | 0 | 3.993310  | 2.461487  | 1.236722  |
| 21 | 1  | 0 | 4.973575  | 2.805879  | 0.907814  |
| 22 | 1  | 0 | 3.847793  | 2.795987  | 2.275528  |
| 23 | 6  | 0 | -2.681767 | 0.038312  | 0.957615  |
| 24 | 6  | 0 | -2.744933 | -0.056470 | 2.356675  |
| 25 | 6  | 0 | -3.005228 | -1.108956 | 0.223577  |
| 26 | 6  | 0 | -3.128690 | -1.232547 | 2.992098  |
| 27 | 1  | 0 | -2.492664 | 0.819255  | 2.943955  |
| 28 | 6  | 0 | -3.389839 | -2.296932 | 0.843789  |
| 29 | 6  | 0 | -3.452772 | -2.355975 | 2.232942  |
| 30 | 1  | 0 | -3.176057 | -1.271200 | 4.074063  |
| 31 | 1  | 0 | -3.635461 | -3.164613 | 0.245418  |
| 32 | 1  | 0 | -3.753448 | -3.278805 | 2.715303  |
| 33 | 6  | 0 | 2.513540  | -1.067631 | 0.791487  |
| 34 | 6  | 0 | 2.367319  | -1.785321 | -0.403304 |
| 35 | 6  | 0 | 2.512250  | -1.804013 | 1.985694  |
| 36 | 6  | 0 | 2.223620  | -3.170260 | -0.417869 |
| 37 | 6  | 0 | 2.368774  | -3.188873 | 1.989508  |
| 38 | 1  | 0 | 2.620808  | -1.267356 | 2.921181  |
| 39 | 6  | 0 | 2.220966  | -3.872795 | 0.785254  |
| 40 | 1  | 0 | 2.121303  | -3.693717 | -1.359593 |
| 41 | 1  | 0 | 2.371219  | -3.729038 | 2.928977  |
| 42 | 1  | 0 | 2.107681  | -4.950604 | 0.773865  |
| 43 | 35 | 0 | -2.918304 | -1.103973 | -1.701274 |
| 44 | 35 | 0 | 2.411945  | -0.876453 | -2.099131 |

1a-syn-GS2

Method: opt freq b3lyp/6-311++g(d,p) scrf(solvent=Chloroform)

SCF Done: E(RB3LYP) = -6223.16717319 A.U. after 1 cycles

Lowest frequency = 15.9570

Zero-point correction= 0.329950  
(Hartree/Particle)  
Thermal correction to Energy= 0.353082  
Thermal correction to Enthalpy= 0.354026  
Thermal correction to Gibbs Free Energy= 0.274115  
Sum of electronic and zero-point Energies= -6222.837223  
Sum of electronic and thermal Energies= -6222.814092  
Sum of electronic and thermal Enthalpies= -6222.813147  
Sum of electronic and thermal Free Energies= -6222.893058

Standard orientation:

| Center<br>Number | Atomic<br>Number | Atomic<br>Type | Coordinates (Angstroms) |          |           |
|------------------|------------------|----------------|-------------------------|----------|-----------|
|                  |                  |                | X                       | Y        | Z         |
| 1                | 6                | 0              | -1.202702               | 2.877117 | -0.141439 |
| 2                | 6                | 0              | -1.225297               | 1.534812 | -0.573754 |
| 3                | 6                | 0              | -2.537645               | 0.888638 | -0.739050 |
| 4                | 6                | 0              | -3.633936               | 1.660982 | -0.760466 |
| 5                | 6                | 0              | -0.002742               | 3.540023 | 0.092154  |
| 6                | 6                | 0              | -0.001499               | 0.892014 | -0.778598 |
| 7                | 6                | 0              | 1.221698                | 1.536149 | -0.574359 |
| 8                | 6                | 0              | 1.197839                | 2.878372 | -0.141817 |
| 9                | 6                | 0              | 3.630160                | 1.664958 | -0.761933 |
| 10               | 6                | 0              | 2.534683                | 0.891488 | -0.740547 |
| 11               | 1                | 0              | -0.003216               | 4.567916 | 0.431787  |

|    |    |   |           |           |           |
|----|----|---|-----------|-----------|-----------|
| 12 | 1  | 0 | -4.625618 | 1.237635  | -0.872676 |
| 13 | 1  | 0 | -0.001019 | -0.145396 | -1.091432 |
| 14 | 1  | 0 | 4.622212  | 1.242682  | -0.874915 |
| 15 | 8  | 0 | 2.353774  | 3.554401  | 0.120487  |
| 16 | 8  | 0 | -2.359298 | 3.551971  | 0.121022  |
| 17 | 6  | 0 | 3.507076  | 3.155329  | -0.648103 |
| 18 | 1  | 0 | 3.440205  | 3.623953  | -1.642197 |
| 19 | 1  | 0 | 4.360920  | 3.590721  | -0.129268 |
| 20 | 6  | 0 | -3.512205 | 3.151534  | -0.647454 |
| 21 | 1  | 0 | -4.366464 | 3.586446  | -0.128907 |
| 22 | 1  | 0 | -3.445642 | 3.619700  | -1.641784 |
| 23 | 6  | 0 | 2.631853  | -0.588265 | -0.908830 |
| 24 | 6  | 0 | 2.836749  | -1.121612 | -2.190024 |
| 25 | 6  | 0 | 2.537738  | -1.494601 | 0.155390  |
| 26 | 6  | 0 | 2.940749  | -2.493901 | -2.401052 |
| 27 | 1  | 0 | 2.910419  | -0.436928 | -3.027207 |
| 28 | 6  | 0 | 2.640989  | -2.870015 | -0.037481 |
| 29 | 6  | 0 | 2.840036  | -3.369653 | -1.322578 |
| 30 | 1  | 0 | 3.099547  | -2.875551 | -3.402834 |
| 31 | 1  | 0 | 2.572681  | -3.541654 | 0.808472  |
| 32 | 1  | 0 | 2.919611  | -4.440068 | -1.472827 |
| 33 | 6  | 0 | -2.633405 | -0.591306 | -0.906202 |
| 34 | 6  | 0 | -2.535092 | -1.496890 | 0.158303  |
| 35 | 6  | 0 | -2.841342 | -1.125706 | -2.186473 |
| 36 | 6  | 0 | -2.637082 | -2.872549 | -0.033449 |
| 37 | 6  | 0 | -2.944168 | -2.498255 | -2.396367 |
| 38 | 1  | 0 | -2.918245 | -0.441624 | -3.023854 |
| 39 | 6  | 0 | -2.839173 | -3.373226 | -1.317669 |
| 40 | 1  | 0 | -2.565514 | -3.543580 | 0.812716  |
| 41 | 1  | 0 | -3.105354 | -2.880726 | -3.397455 |
| 42 | 1  | 0 | -2.917770 | -4.443835 | -1.467051 |
| 43 | 35 | 0 | 2.303878  | -0.859885 | 1.956156  |
| 44 | 35 | 0 | -2.297371 | -0.860780 | 1.958077  |

1a-syn-GS3

Method: opt freq b3lyp/6-311++g(d,p) scrf(solvent=Chloroform) iop(1/8=1, 1/9  
SCF Done: E(RB3LYP) = -6223.16710227 A.U. after 2 cycles  
Lowest frequency = 8.5585

Zero-point correction= 0.329843  
(Hartree/Particle)  
Thermal correction to Energy= 0.353096  
Thermal correction to Enthalpy= 0.354040  
Thermal correction to Gibbs Free Energy= 0.272021  
Sum of electronic and zero-point Energies= -6222.837259  
Sum of electronic and thermal Energies= -6222.814006  
Sum of electronic and thermal Enthalpies= -6222.813062  
Sum of electronic and thermal Free Energies= -6222.895081

Standard orientation:

| Center<br>Number | Atomic<br>Number | Atomic<br>Type | Coordinates (Angstroms) |          |          |
|------------------|------------------|----------------|-------------------------|----------|----------|
|                  |                  |                | X                       | Y        | Z        |
| 1                | 6                | 0              | 1.200266                | 3.035759 | 0.309381 |
| 2                | 6                | 0              | 1.223895                | 1.626116 | 0.369683 |
| 3                | 6                | 0              | 2.534435                | 0.964294 | 0.468085 |
| 4                | 6                | 0              | 3.639079                | 1.687193 | 0.234055 |
| 5                | 6                | 0              | -0.000567               | 3.737166 | 0.298154 |

|    |    |   |           |           |           |
|----|----|---|-----------|-----------|-----------|
| 6  | 6  | 0 | -0.000176 | 0.952394  | 0.403053  |
| 7  | 6  | 0 | -1.224435 | 1.625779  | 0.369951  |
| 8  | 6  | 0 | -1.201200 | 3.035431  | 0.309709  |
| 9  | 6  | 0 | -3.639673 | 1.686206  | 0.234896  |
| 10 | 6  | 0 | -2.534771 | 0.963573  | 0.468513  |
| 11 | 1  | 0 | -0.000720 | 4.819252  | 0.264774  |
| 12 | 1  | 0 | 4.629652  | 1.253368  | 0.308670  |
| 13 | 1  | 0 | -0.000020 | -0.128431 | 0.476864  |
| 14 | 1  | 0 | -4.630099 | 1.252055  | 0.309584  |
| 15 | 8  | 0 | -2.354634 | 3.762936  | 0.335514  |
| 16 | 8  | 0 | 2.353511  | 3.763563  | 0.334794  |
| 17 | 6  | 0 | -3.527597 | 3.116032  | -0.201192 |
| 18 | 1  | 0 | -4.368932 | 3.713448  | 0.149459  |
| 19 | 1  | 0 | -3.492364 | 3.190701  | -1.298881 |
| 20 | 6  | 0 | 3.526433  | 3.116893  | -0.202304 |
| 21 | 1  | 0 | 3.490667  | 3.191329  | -1.299990 |
| 22 | 1  | 0 | 4.367749  | 3.714623  | 0.147851  |
| 23 | 6  | 0 | -2.616058 | -0.469551 | 0.881349  |
| 24 | 6  | 0 | -2.596495 | -0.795334 | 2.245989  |
| 25 | 6  | 0 | -2.717820 | -1.528249 | -0.028611 |
| 26 | 6  | 0 | -2.688599 | -2.113124 | 2.682132  |
| 27 | 1  | 0 | -2.513055 | 0.010102  | 2.966852  |
| 28 | 6  | 0 | -2.808603 | -2.854628 | 0.390019  |
| 29 | 6  | 0 | -2.794812 | -3.145247 | 1.751398  |
| 30 | 1  | 0 | -2.678388 | -2.332528 | 3.743324  |
| 31 | 1  | 0 | -2.889606 | -3.648765 | -0.340784 |
| 32 | 1  | 0 | -2.866999 | -4.176097 | 2.078195  |
| 33 | 6  | 0 | 2.616240  | -0.468692 | 0.881303  |
| 34 | 6  | 0 | 2.718349  | -1.527622 | -0.028331 |
| 35 | 6  | 0 | 2.596874  | -0.794069 | 2.246051  |
| 36 | 6  | 0 | 2.809686  | -2.853842 | 0.390696  |
| 37 | 6  | 0 | 2.689517  | -2.111687 | 2.682589  |
| 38 | 1  | 0 | 2.513164  | 0.011557  | 2.966669  |
| 39 | 6  | 0 | 2.796091  | -3.144053 | 1.752160  |
| 40 | 1  | 0 | 2.890954  | -3.648166 | -0.339873 |
| 41 | 1  | 0 | 2.679451  | -2.330778 | 3.743847  |
| 42 | 1  | 0 | 2.868707  | -4.174774 | 2.079269  |
| 43 | 35 | 0 | -2.734286 | -1.191073 | -1.925382 |
| 44 | 35 | 0 | 2.734528  | -1.191022 | -1.925208 |

1a-TS1-ext

Method: opt(ts,calcfc,noeigen) freq b3lyp/6-311++g(d,p) scrf(solvent=Chlorof  
SCF Done: E(RB3LYP) = -6223.14216740 A.U. after 1 cycles  
Lowest frequency = -39.4369

Zero-point correction= 0.330516  
(Hartree/Particle)  
Thermal correction to Energy= 0.352591  
Thermal correction to Enthalpy= 0.353535  
Thermal correction to Gibbs Free Energy= 0.276413  
Sum of electronic and zero-point Energies= -6222.811651  
Sum of electronic and thermal Energies= -6222.789576  
Sum of electronic and thermal Enthalpies= -6222.788632  
Sum of electronic and thermal Free Energies= -6222.865754

Standard orientation:

| Center<br>Number | Atomic<br>Number | Atomic<br>Type | Coordinates (Angstroms) |   |   |
|------------------|------------------|----------------|-------------------------|---|---|
|                  |                  |                | X                       | Y | Z |

|    |    |   |           |           |           |
|----|----|---|-----------|-----------|-----------|
| 1  | 6  | 0 | -0.718656 | 2.691531  | -0.327435 |
| 2  | 6  | 0 | -0.727685 | 1.296371  | -0.089889 |
| 3  | 6  | 0 | -2.046323 | 0.694713  | 0.308122  |
| 4  | 6  | 0 | -2.837422 | 1.532474  | 1.011950  |
| 5  | 6  | 0 | 0.396476  | 3.356563  | -0.827545 |
| 6  | 6  | 0 | 0.520536  | 0.661222  | -0.174713 |
| 7  | 6  | 0 | 1.677824  | 1.306368  | -0.622442 |
| 8  | 6  | 0 | 1.586923  | 2.662845  | -0.989218 |
| 9  | 6  | 0 | 4.056110  | 1.379014  | -1.068253 |
| 10 | 6  | 0 | 2.976953  | 0.633873  | -0.789471 |
| 11 | 1  | 0 | 0.346183  | 4.418629  | -1.030584 |
| 12 | 1  | 0 | -3.786730 | 1.233244  | 1.418504  |
| 13 | 1  | 0 | 0.631248  | -0.362484 | 0.147253  |
| 14 | 1  | 0 | 5.032344  | 0.930651  | -1.213987 |
| 15 | 8  | 0 | 2.649780  | 3.328902  | -1.526104 |
| 16 | 8  | 0 | -1.819506 | 3.444404  | -0.032199 |
| 17 | 6  | 0 | 3.958175  | 2.874037  | -1.123087 |
| 18 | 1  | 0 | 4.646112  | 3.296132  | -1.855723 |
| 19 | 1  | 0 | 4.193995  | 3.317621  | -0.143553 |
| 20 | 6  | 0 | -2.458597 | 2.969520  | 1.171438  |
| 21 | 1  | 0 | -1.779396 | 3.141600  | 2.019824  |
| 22 | 1  | 0 | -3.340672 | 3.594817  | 1.303644  |
| 23 | 6  | 0 | 3.066067  | -0.855259 | -0.708646 |
| 24 | 6  | 0 | 2.885131  | -1.621490 | -1.870157 |
| 25 | 6  | 0 | 3.331124  | -1.546299 | 0.479687  |
| 26 | 6  | 0 | 2.975213  | -3.010016 | -1.848421 |
| 27 | 1  | 0 | 2.675260  | -1.105787 | -2.800338 |
| 28 | 6  | 0 | 3.422659  | -2.936342 | 0.520812  |
| 29 | 6  | 0 | 3.244040  | -3.668661 | -0.649837 |
| 30 | 1  | 0 | 2.838674  | -3.573951 | -2.763696 |
| 31 | 1  | 0 | 3.633803  | -3.437955 | 1.456271  |
| 32 | 1  | 0 | 3.317564  | -4.749537 | -0.619728 |
| 33 | 6  | 0 | -2.495723 | -0.673537 | -0.119838 |
| 34 | 6  | 0 | -3.824968 | -1.179158 | -0.091525 |
| 35 | 6  | 0 | -1.559103 | -1.581907 | -0.661851 |
| 36 | 6  | 0 | -4.136899 | -2.487108 | -0.463802 |
| 37 | 6  | 0 | -1.859480 | -2.880495 | -1.050228 |
| 38 | 1  | 0 | -0.547144 | -1.255590 | -0.809677 |
| 39 | 6  | 0 | -3.157688 | -3.355568 | -0.928143 |
| 40 | 1  | 0 | -5.165575 | -2.816909 | -0.407569 |
| 41 | 1  | 0 | -1.072786 | -3.509505 | -1.449707 |
| 42 | 1  | 0 | -3.420223 | -4.367477 | -1.212624 |
| 43 | 35 | 0 | -5.434035 | -0.171020 | 0.324577  |
| 44 | 35 | 0 | 3.591378  | -0.586582 | 2.129796  |

1a-TS2-int

Method: opt(ts,calcfc,noeigen) freq b3lyp/6-311++g(d,p) scrf(solvent=Chlorof  
SCF Done: E(RB3LYP) = -6223.12825759 A.U. after 1 cycles  
Lowest frequency = -35.7809

|                                            |              |
|--------------------------------------------|--------------|
| Zero-point correction=                     | 0.330310     |
| (Hartree/Particle)                         |              |
| Thermal correction to Energy=              | 0.352312     |
| Thermal correction to Enthalpy=            | 0.353256     |
| Thermal correction to Gibbs Free Energy=   | 0.277027     |
| Sum of electronic and zero-point Energies= | -6222.797947 |
| Sum of electronic and thermal Energies=    | -6222.775946 |
| Sum of electronic and thermal Enthalpies=  | -6222.775002 |

Sum of electronic and thermal Free Energies= -6222.851231

Standard orientation:

| Center<br>Number | Atomic<br>Number | Atomic<br>Type | Coordinates (Angstroms) |           |           |
|------------------|------------------|----------------|-------------------------|-----------|-----------|
|                  |                  |                | X                       | Y         | Z         |
| 1                | 6                | 0              | -1.030044               | 2.958870  | -0.358474 |
| 2                | 6                | 0              | -1.144740               | 1.593487  | -0.005806 |
| 3                | 6                | 0              | -2.463581               | 1.167658  | 0.577767  |
| 4                | 6                | 0              | -3.023621               | 2.131274  | 1.347766  |
| 5                | 6                | 0              | 0.096076                | 3.473335  | -0.991136 |
| 6                | 6                | 0              | 0.037104                | 0.848259  | -0.083387 |
| 7                | 6                | 0              | 1.217671                | 1.347783  | -0.645185 |
| 8                | 6                | 0              | 1.210501                | 2.662694  | -1.151165 |
| 9                | 6                | 0              | 3.573349                | 1.197293  | -1.194083 |
| 10               | 6                | 0              | 2.460313                | 0.568429  | -0.787948 |
| 11               | 1                | 0              | 0.127070                | 4.515651  | -1.281254 |
| 12               | 1                | 0              | -3.923564               | 1.976277  | 1.924132  |
| 13               | 1                | 0              | 0.057586                | -0.149858 | 0.319297  |
| 14               | 1                | 0              | 4.508727                | 0.664101  | -1.321413 |
| 15               | 8                | 0              | 2.286522                | 3.182214  | -1.812151 |
| 16               | 8                | 0              | -2.019901               | 3.836772  | -0.006884 |
| 17               | 6                | 0              | 3.579206                | 2.678595  | -1.420650 |
| 18               | 1                | 0              | 4.253966                | 2.959547  | -2.229613 |
| 19               | 1                | 0              | 3.901061                | 3.212121  | -0.512830 |
| 20               | 6                | 0              | -2.484315               | 3.525187  | 1.324701  |
| 21               | 1                | 0              | -1.656294               | 3.683416  | 2.031338  |
| 22               | 1                | 0              | -3.269048               | 4.248439  | 1.543978  |
| 23               | 6                | 0              | 2.474041                | -0.904994 | -0.542117 |
| 24               | 6                | 0              | 2.352018                | -1.785411 | -1.627900 |
| 25               | 6                | 0              | 2.632757                | -1.473772 | 0.726965  |
| 26               | 6                | 0              | 2.388279                | -3.165957 | -1.455259 |
| 27               | 1                | 0              | 2.227746                | -1.365313 | -2.619362 |
| 28               | 6                | 0              | 2.667319                | -2.853353 | 0.919633  |
| 29               | 6                | 0              | 2.543401                | -3.700960 | -0.177943 |
| 30               | 1                | 0              | 2.295368                | -3.819719 | -2.314523 |
| 31               | 1                | 0              | 2.795513                | -3.258204 | 1.915118  |
| 32               | 1                | 0              | 2.571265                | -4.774185 | -0.029759 |
| 33               | 6                | 0              | -3.283600               | -0.081055 | 0.303089  |
| 34               | 6                | 0              | -2.937959               | -1.347362 | -0.229240 |
| 35               | 6                | 0              | -4.670745               | 0.034221  | 0.599714  |
| 36               | 6                | 0              | -3.851447               | -2.407877 | -0.298659 |
| 37               | 6                | 0              | -5.584432               | -1.002339 | 0.527106  |
| 38               | 1                | 0              | -5.060351               | 1.001392  | 0.872766  |
| 39               | 6                | 0              | -5.168776               | -2.258557 | 0.099357  |
| 40               | 1                | 0              | -3.513179               | -3.357209 | -0.691362 |
| 41               | 1                | 0              | -6.620945               | -0.815894 | 0.782494  |
| 42               | 1                | 0              | -5.856746               | -3.092909 | 0.033841  |
| 43               | 35               | 0              | -1.258019               | -1.848018 | -1.040017 |
| 44               | 35               | 0              | 2.843625                | -0.352332 | 2.279633  |

**Compound 2a:**

2a-anti-GS1

Method: opt freq b3lyp/6-311++g(d,p) scrf(solvent=Chloroform)

SCF Done: E(RB3LYP) = -6223.16229827 A.U. after 1 cycles  
 Lowest frequency = 13.7385

Zero-point correction= 0.330013  
 (Hartree/Particle)  
 Thermal correction to Energy= 0.353144  
 Thermal correction to Enthalpy= 0.354089  
 Thermal correction to Gibbs Free Energy= 0.273471  
 Sum of electronic and zero-point Energies= -6222.832285  
 Sum of electronic and thermal Energies= -6222.809154  
 Sum of electronic and thermal Enthalpies= -6222.808210  
 Sum of electronic and thermal Free Energies= -6222.888827

## Standard orientation:

| Center<br>Number | Atomic<br>Number | Atomic<br>Type | Coordinates (Angstroms) |           |           |
|------------------|------------------|----------------|-------------------------|-----------|-----------|
|                  |                  |                | X                       | Y         | Z         |
| 1                | 6                | 0              | 0.856689                | 2.862704  | 0.630366  |
| 2                | 6                | 0              | -0.483472               | 2.526379  | 0.794031  |
| 3                | 6                | 0              | -0.997551               | 1.280124  | 0.367558  |
| 4                | 6                | 0              | -0.119222               | 0.426098  | -0.322928 |
| 5                | 6                | 0              | 1.245434                | 0.743254  | -0.491191 |
| 6                | 6                | 0              | 1.710720                | 1.966053  | 0.001580  |
| 7                | 8                | 0              | -0.604308               | -0.764888 | -0.773497 |
| 8                | 6                | 0              | 0.044673                | -1.317311 | -1.935650 |
| 9                | 6                | 0              | 1.537930                | -1.254326 | -1.827752 |
| 10               | 6                | 0              | 2.111328                | -0.254882 | -1.141910 |
| 11               | 8                | 0              | -1.286162               | 3.425057  | 1.435671  |
| 12               | 6                | 0              | -2.676873               | 3.383239  | 1.057883  |
| 13               | 6                | 0              | -3.197450               | 1.979899  | 1.079785  |
| 14               | 6                | 0              | -2.396853               | 0.964705  | 0.720468  |
| 15               | 6                | 0              | -2.884551               | -0.443577 | 0.830220  |
| 16               | 6                | 0              | -3.823583               | -1.016670 | -0.033496 |
| 17               | 6                | 0              | -4.291663               | -2.317275 | 0.142543  |
| 18               | 6                | 0              | -3.815599               | -3.079892 | 1.205510  |
| 19               | 6                | 0              | -2.874781               | -2.538516 | 2.080113  |
| 20               | 6                | 0              | -2.419888               | -1.238852 | 1.888353  |
| 21               | 6                | 0              | 3.595721                | -0.129173 | -1.058873 |
| 22               | 6                | 0              | 4.311796                | 0.287663  | -2.191324 |
| 23               | 6                | 0              | 5.697761                | 0.418992  | -2.172325 |
| 24               | 6                | 0              | 6.404319                | 0.133364  | -1.006558 |
| 25               | 6                | 0              | 5.722772                | -0.288625 | 0.132981  |
| 26               | 6                | 0              | 4.336393                | -0.413571 | 0.096418  |
| 27               | 35               | 0              | -4.488614               | -0.042971 | -1.560070 |
| 28               | 35               | 0              | 3.458606                | -1.046567 | 1.688248  |
| 29               | 1                | 0              | 1.208504                | 3.821230  | 0.990319  |
| 30               | 1                | 0              | 2.756435                | 2.222532  | -0.119369 |
| 31               | 1                | 0              | -0.314180               | -2.344153 | -1.999288 |
| 32               | 1                | 0              | -0.314632               | -0.775721 | -2.824035 |
| 33               | 1                | 0              | 2.125176                | -2.021142 | -2.319768 |
| 34               | 1                | 0              | -3.191023               | 4.018521  | 1.777899  |
| 35               | 1                | 0              | -2.781417               | 3.837838  | 0.060963  |
| 36               | 1                | 0              | -4.220169               | 1.809026  | 1.394876  |
| 37               | 1                | 0              | -5.017070               | -2.729294 | -0.546995 |
| 38               | 1                | 0              | -4.179804               | -4.091328 | 1.343623  |
| 39               | 1                | 0              | -2.498591               | -3.124996 | 2.910224  |



|    |   |   |           |           |           |
|----|---|---|-----------|-----------|-----------|
| 40 | 1 | 0 | -1.689469 | -0.815920 | 2.568903  |
| 41 | 1 | 0 | 3.757810  | 0.516204  | -3.094488 |
| 42 | 1 | 0 | 6.221201  | 0.744223  | -3.063728 |
| 43 | 1 | 0 | 7.483218  | 0.231978  | -0.977567 |
| 44 | 1 | 0 | 6.263739  | -0.525320 | 1.040016  |

2a-anti-GS2

Method: opt freq b3lyp/6-311++g(d,p) scrf(solvent=Chloroform)  
 SCF Done: E(RB3LYP) = -6223.16326195 A.U. after 1 cycles  
 Lowest frequency = 17.3605

|                                              |              |
|----------------------------------------------|--------------|
| Zero-point correction=                       | 0.330103     |
| (Hartree/Particle)                           |              |
| Thermal correction to Energy=                | 0.353174     |
| Thermal correction to Enthalpy=              | 0.354118     |
| Thermal correction to Gibbs Free Energy=     | 0.274094     |
| Sum of electronic and zero-point Energies=   | -6222.833159 |
| Sum of electronic and thermal Energies=      | -6222.810088 |
| Sum of electronic and thermal Enthalpies=    | -6222.809144 |
| Sum of electronic and thermal Free Energies= | -6222.889168 |

Standard orientation:

| Center<br>Number | Atomic<br>Number | Atomic<br>Type | Coordinates (Angstroms) |           |           |
|------------------|------------------|----------------|-------------------------|-----------|-----------|
|                  |                  |                | X                       | Y         | Z         |
| 1                | 6                | 0              | 0.580965                | 2.062561  | -1.753930 |
| 2                | 6                | 0              | -0.653837               | 2.172154  | -1.122514 |
| 3                | 6                | 0              | -1.116524               | 1.191343  | -0.215179 |
| 4                | 6                | 0              | -0.237810               | 0.141329  | 0.096621  |
| 5                | 6                | 0              | 1.040238                | 0.039312  | -0.490426 |
| 6                | 6                | 0              | 1.416551                | 1.000298  | -1.433461 |
| 7                | 8                | 0              | -0.622630               | -0.752478 | 1.052271  |
| 8                | 6                | 0              | -0.083927               | -2.084196 | 0.933531  |
| 9                | 6                | 0              | 1.387500                | -2.069413 | 0.648767  |
| 10               | 6                | 0              | 1.921505                | -1.053110 | -0.044129 |
| 11               | 8                | 0              | -1.445302               | 3.231208  | -1.461912 |
| 12               | 6                | 0              | -2.335483               | 3.680515  | -0.421855 |
| 13               | 6                | 0              | -3.087738               | 2.531389  | 0.175290  |
| 14               | 6                | 0              | -2.500539               | 1.328275  | 0.284597  |
| 15               | 6                | 0              | -3.279674               | 0.191727  | 0.860420  |
| 16               | 6                | 0              | -3.729790               | -0.902408 | 0.111397  |
| 17               | 6                | 0              | -4.492027               | -1.921603 | 0.675697  |
| 18               | 6                | 0              | -4.828232               | -1.860641 | 2.026374  |
| 19               | 6                | 0              | -4.408367               | -0.777657 | 2.795285  |
| 20               | 6                | 0              | -3.647262               | 0.231568  | 2.213415  |
| 21               | 6                | 0              | 3.373146                | -1.034092 | -0.388495 |
| 22               | 6                | 0              | 3.853213                | -1.897688 | -1.384690 |
| 23               | 6                | 0              | 5.198370                | -1.923510 | -1.743135 |
| 24               | 6                | 0              | 6.101170                | -1.075805 | -1.105803 |
| 25               | 6                | 0              | 5.656443                | -0.210558 | -0.108384 |
| 26               | 6                | 0              | 4.307489                | -0.197403 | 0.236704  |
| 27               | 35               | 0              | -3.347728               | -1.024818 | -1.773640 |
| 28               | 35               | 0              | 3.762408                | 0.986714  | 1.653345  |
| 29               | 1                | 0              | 0.879868                | 2.821866  | -2.465407 |
| 30               | 1                | 0              | 2.392513                | 0.932294  | -1.899122 |
| 31               | 1                | 0              | -0.306788               | -2.566142 | 1.885138  |
| 32               | 1                | 0              | -0.637790               | -2.616059 | 0.145260  |

|    |   |   |           |           |           |
|----|---|---|-----------|-----------|-----------|
| 33 | 1 | 0 | 1.990606  | -2.895822 | 1.007158  |
| 34 | 1 | 0 | -1.744108 | 4.215889  | 0.336429  |
| 35 | 1 | 0 | -3.003075 | 4.395741  | -0.900691 |
| 36 | 1 | 0 | -4.113297 | 2.688142  | 0.489034  |
| 37 | 1 | 0 | -4.827758 | -2.748542 | 0.063251  |
| 38 | 1 | 0 | -5.420977 | -2.654079 | 2.466607  |
| 39 | 1 | 0 | -4.669941 | -0.718234 | 3.845378  |
| 40 | 1 | 0 | -3.308505 | 1.068218  | 2.813115  |
| 41 | 1 | 0 | 3.146239  | -2.550397 | -1.883699 |
| 42 | 1 | 0 | 5.537484  | -2.601574 | -2.517477 |
| 43 | 1 | 0 | 7.150797  | -1.085059 | -1.375642 |
| 44 | 1 | 0 | 6.352092  | 0.443230  | 0.401536  |

-----  
2a-syn-GS1

Method: opt freq b3lyp/6-311++g(d,p) scrf(solvent=Chloroform)  
SCF Done: E(RB3LYP) = -6223.16232288 A.U. after 1 cycles  
Lowest frequency = 14.8887

Zero-point correction= 0.330032  
(Hartree/Particle)  
Thermal correction to Energy= 0.353121  
Thermal correction to Enthalpy= 0.354065  
Thermal correction to Gibbs Free Energy= 0.274093  
Sum of electronic and zero-point Energies= -6222.832290  
Sum of electronic and thermal Energies= -6222.809202  
Sum of electronic and thermal Enthalpies= -6222.808258  
Sum of electronic and thermal Free Energies= -6222.888230

Standard orientation:

| Center<br>Number | Atomic<br>Number | Atomic<br>Type | Coordinates (Angstroms) |           |           |
|------------------|------------------|----------------|-------------------------|-----------|-----------|
|                  |                  |                | X                       | Y         | Z         |
| 1                | 6                | 0              | -0.530463               | 2.760394  | -1.075000 |
| 2                | 6                | 0              | 0.824497                | 2.527932  | -0.863244 |
| 3                | 6                | 0              | 1.281112                | 1.528444  | 0.025894  |
| 4                | 6                | 0              | 0.306855                | 0.835355  | 0.765075  |
| 5                | 6                | 0              | -1.072997               | 1.051527  | 0.562865  |
| 6                | 6                | 0              | -1.466565               | 2.014815  | -0.370319 |
| 7                | 8                | 0              | 0.726160                | -0.118623 | 1.643690  |
| 8                | 6                | 0              | -0.131562               | -0.368270 | 2.773635  |
| 9                | 6                | 0              | -1.572033               | -0.475227 | 2.375252  |
| 10               | 6                | 0              | -2.022326               | 0.216887  | 1.318952  |
| 11               | 8                | 0              | 1.712143                | 3.270061  | -1.589039 |
| 12               | 6                | 0              | 2.977682                | 3.510331  | -0.945429 |
| 13               | 6                | 0              | 3.551285                | 2.243229  | -0.391036 |
| 14               | 6                | 0              | 2.738368                | 1.285498  | 0.084797  |
| 15               | 6                | 0              | 3.338053                | 0.022407  | 0.608594  |
| 16               | 6                | 0              | 3.217766                | -1.218213 | -0.029646 |
| 17               | 6                | 0              | 3.826525                | -2.366560 | 0.468396  |
| 18               | 6                | 0              | 4.585890                | -2.291945 | 1.634077  |
| 19               | 6                | 0              | 4.738155                | -1.069054 | 2.283526  |
| 20               | 6                | 0              | 4.121765                | 0.068514  | 1.770921  |
| 21               | 6                | 0              | -3.462259               | 0.176010  | 0.929140  |
| 22               | 6                | 0              | -4.403345               | 0.860273  | 1.713266  |
| 23               | 6                | 0              | -5.759854               | 0.852605  | 1.399586  |
| 24               | 6                | 0              | -6.207814               | 0.152724  | 0.281789  |
| 25               | 6                | 0              | -5.298646               | -0.541452 | -0.513538 |
| 26               | 6                | 0              | -3.945266               | -0.522459 | -0.185780 |

|    |    |   |           |           |           |
|----|----|---|-----------|-----------|-----------|
| 27 | 35 | 0 | 2.230686  | -1.381426 | -1.674798 |
| 28 | 35 | 0 | -2.744857 | -1.537533 | -1.294914 |
| 29 | 1  | 0 | -0.831057 | 3.524477  | -1.780636 |
| 30 | 1  | 0 | -2.522546 | 2.188920  | -0.539077 |
| 31 | 1  | 0 | 0.237446  | -1.296091 | 3.210094  |
| 32 | 1  | 0 | 0.019231  | 0.436752  | 3.509683  |
| 33 | 1  | 0 | -2.224801 | -1.109611 | 2.963841  |
| 34 | 1  | 0 | 3.617379  | 3.939767  | -1.715595 |
| 35 | 1  | 0 | 2.832472  | 4.267142  | -0.159187 |
| 36 | 1  | 0 | 4.627083  | 2.111580  | -0.405120 |
| 37 | 1  | 0 | 3.715170  | -3.307550 | -0.054757 |
| 38 | 1  | 0 | 5.058867  | -3.186416 | 2.022611  |
| 39 | 1  | 0 | 5.332992  | -0.999676 | 3.186921  |
| 40 | 1  | 0 | 4.228983  | 1.018698  | 2.281166  |
| 41 | 1  | 0 | -4.049997 | 1.409465  | 2.578395  |
| 42 | 1  | 0 | -6.461532 | 1.391736  | 2.025192  |
| 43 | 1  | 0 | -7.260829 | 0.138832  | 0.025651  |
| 44 | 1  | 0 | -5.638233 | -1.098511 | -1.377129 |

-----

2a-syn-GS2

Method: opt freq b3lyp/6-311++g(d,p) scrf(solvent=Chloroform)

SCF Done: E(RB3LYP) = -6223.16271061 A.U. after 1 cycles

Lowest frequency = 9.6202

Zero-point correction= 0.330055  
(Hartree/Particle)  
Thermal correction to Energy= 0.353176  
Thermal correction to Enthalpy= 0.354120  
Thermal correction to Gibbs Free Energy= 0.273298  
Sum of electronic and zero-point Energies= -6222.832656  
Sum of electronic and thermal Energies= -6222.809534  
Sum of electronic and thermal Enthalpies= -6222.808590  
Sum of electronic and thermal Free Energies= -6222.889412

Standard orientation:

| Center<br>Number | Atomic<br>Number | Atomic<br>Type | Coordinates (Angstroms) |           |           |
|------------------|------------------|----------------|-------------------------|-----------|-----------|
|                  |                  |                | X                       | Y         | Z         |
| 1                | 6                | 0              | -0.427017               | 2.566916  | -1.276774 |
| 2                | 6                | 0              | 0.910693                | 2.452368  | -0.912159 |
| 3                | 6                | 0              | 1.354888                | 1.456480  | -0.012328 |
| 4                | 6                | 0              | 0.375727                | 0.635980  | 0.571080  |
| 5                | 6                | 0              | -0.992061               | 0.761840  | 0.249074  |
| 6                | 6                | 0              | -1.365233               | 1.724309  | -0.694414 |
| 7                | 8                | 0              | 0.774306                | -0.244736 | 1.532843  |
| 8                | 6                | 0              | -0.028977               | -1.431511 | 1.690807  |
| 9                | 6                | 0              | -1.494210               | -1.119203 | 1.691114  |
| 10               | 6                | 0              | -1.954511               | -0.087060 | 0.970769  |
| 11               | 8                | 0              | 1.802322                | 3.297131  | -1.507271 |
| 12               | 6                | 0              | 2.962380                | 3.613533  | -0.713465 |
| 13               | 6                | 0              | 3.585439                | 2.372711  | -0.152181 |
| 14               | 6                | 0              | 2.812678                | 1.330662  | 0.195825  |
| 15               | 6                | 0              | 3.459796                | 0.094218  | 0.727917  |
| 16               | 6                | 0              | 3.521970                | -1.115723 | 0.025667  |
| 17               | 6                | 0              | 4.173148                | -2.234727 | 0.537700  |
| 18               | 6                | 0              | 4.790402                | -2.160187 | 1.784456  |
| 19               | 6                | 0              | 4.759062                | -0.966217 | 2.501280  |
| 20               | 6                | 0              | 4.103127                | 0.141657  | 1.973335  |
| 21               | 6                | 0              | -3.410393               | 0.245671  | 0.931111  |

|    |    |   |           |           |           |
|----|----|---|-----------|-----------|-----------|
| 22 | 6  | 0 | -3.922937 | 1.199673  | 1.823432  |
| 23 | 6  | 0 | -5.273436 | 1.533273  | 1.838017  |
| 24 | 6  | 0 | -6.148980 | 0.918008  | 0.944782  |
| 25 | 6  | 0 | -5.669547 | -0.026774 | 0.041730  |
| 26 | 6  | 0 | -4.313466 | -0.349542 | 0.042549  |
| 27 | 35 | 0 | 2.736883  | -1.274793 | -1.726573 |
| 28 | 35 | 0 | -3.709761 | -1.654292 | -1.240277 |
| 29 | 1  | 0 | -0.716733 | 3.326628  | -1.991621 |
| 30 | 1  | 0 | -2.411354 | 1.835013  | -0.953349 |
| 31 | 1  | 0 | 0.226155  | -2.136057 | 0.884947  |
| 32 | 1  | 0 | 0.293922  | -1.868706 | 2.635353  |
| 33 | 1  | 0 | -2.159026 | -1.768388 | 2.249274  |
| 34 | 1  | 0 | 3.640115  | 4.136890  | -1.386737 |
| 35 | 1  | 0 | 2.660846  | 4.311788  | 0.082160  |
| 36 | 1  | 0 | 4.664539  | 2.329012  | -0.060580 |
| 37 | 1  | 0 | 4.205827  | -3.151356 | -0.037055 |
| 38 | 1  | 0 | 5.296997  | -3.031245 | 2.183621  |
| 39 | 1  | 0 | 5.241620  | -0.896456 | 3.469244  |
| 40 | 1  | 0 | 4.066605  | 1.067587  | 2.535288  |
| 41 | 1  | 0 | -3.238970 | 1.677047  | 2.515974  |
| 42 | 1  | 0 | -5.640172 | 2.269174  | 2.543937  |
| 43 | 1  | 0 | -7.203334 | 1.168947  | 0.945808  |
| 44 | 1  | 0 | -6.340576 | -0.509195 | -0.657041 |

2a-TS4-A-fix-DOWN-B-int

Method: opt(ts,calcfc,noeigen) freq b3lyp/6-311++g(d,p) scrf(solvent=Chlorof

SCF Done: E(RB3LYP) = -6223.11744317 A.U. after 1 cycles

Lowest frequency = -24.5883

Zero-point correction= 0.329931  
(Hartree/Particle)  
Thermal correction to Energy= 0.351879  
Thermal correction to Enthalpy= 0.352824  
Thermal correction to Gibbs Free Energy= 0.277053  
Sum of electronic and zero-point Energies= -6222.787512  
Sum of electronic and thermal Energies= -6222.765564  
Sum of electronic and thermal Enthalpies= -6222.764620  
Sum of electronic and thermal Free Energies= -6222.840390

Standard orientation:

| Center<br>Number | Atomic<br>Number | Atomic<br>Type | Coordinates (Angstroms) |          |           |
|------------------|------------------|----------------|-------------------------|----------|-----------|
|                  |                  |                | X                       | Y        | Z         |
| 1                | 6                | 0              | 0.400790                | 2.832566 | -1.276656 |
| 2                | 6                | 0              | -0.902976               | 2.618069 | -0.841366 |
| 3                | 6                | 0              | -1.244842               | 1.560894 | 0.038023  |
| 4                | 6                | 0              | -0.174550               | 1.044224 | 0.787011  |
| 5                | 6                | 0              | 1.164077                | 1.219816 | 0.361656  |
| 6                | 6                | 0              | 1.421509                | 2.077121 | -0.711567 |
| 7                | 8                | 0              | -0.454603               | 0.392280 | 1.939787  |
| 8                | 6                | 0              | 0.598364                | 0.303663 | 2.922118  |
| 9                | 6                | 0              | 1.931010                | 0.005293 | 2.307389  |
| 10               | 6                | 0              | 2.209314                | 0.474482 | 1.082396  |
| 11               | 8                | 0              | -1.879982               | 3.511291 | -1.190475 |
| 12               | 6                | 0              | -2.761061               | 3.745005 | -0.054406 |
| 13               | 6                | 0              | -3.436334               | 2.452268 | 0.282488  |
| 14               | 6                | 0              | -2.716504               | 1.311368 | 0.192790  |
| 15               | 6                | 0              | -3.477653               | 0.045866 | -0.151942 |

|    |    |   |           |           |           |
|----|----|---|-----------|-----------|-----------|
| 16 | 6  | 0 | -3.233900 | -1.323403 | 0.105826  |
| 17 | 6  | 0 | -4.143134 | -2.322020 | -0.262139 |
| 18 | 6  | 0 | -5.313421 | -2.022732 | -0.942637 |
| 19 | 6  | 0 | -5.553762 | -0.700392 | -1.295656 |
| 20 | 6  | 0 | -4.649541 | 0.281553  | -0.922818 |
| 21 | 6  | 0 | 3.549544  | 0.270392  | 0.460622  |
| 22 | 6  | 0 | 4.652734  | 0.972143  | 0.970364  |
| 23 | 6  | 0 | 5.927637  | 0.821355  | 0.431497  |
| 24 | 6  | 0 | 6.127654  | -0.044280 | -0.641066 |
| 25 | 6  | 0 | 5.053633  | -0.760539 | -1.165198 |
| 26 | 6  | 0 | 3.784878  | -0.597089 | -0.615111 |
| 27 | 35 | 0 | -1.652250 | -2.061081 | 0.910845  |
| 28 | 35 | 0 | 2.353930  | -1.655008 | -1.346434 |
| 29 | 1  | 0 | 0.602728  | 3.618588  | -1.993174 |
| 30 | 1  | 0 | 2.441980  | 2.213337  | -1.049516 |
| 31 | 1  | 0 | 0.620973  | 1.252854  | 3.478732  |
| 32 | 1  | 0 | 0.280777  | -0.481533 | 3.608363  |
| 33 | 1  | 0 | 2.647399  | -0.575603 | 2.876612  |
| 34 | 1  | 0 | -2.160606 | 4.165765  | 0.762547  |
| 35 | 1  | 0 | -3.479481 | 4.492330  | -0.387285 |
| 36 | 1  | 0 | -4.513820 | 2.449464  | 0.384375  |
| 37 | 1  | 0 | -3.911789 | -3.349633 | -0.016198 |
| 38 | 1  | 0 | -5.998690 | -2.815365 | -1.218793 |
| 39 | 1  | 0 | -6.425254 | -0.429081 | -1.879815 |
| 40 | 1  | 0 | -4.832961 | 1.286572  | -1.270995 |
| 41 | 1  | 0 | 4.491406  | 1.650939  | 1.799843  |
| 42 | 1  | 0 | 6.758672  | 1.378999  | 0.847204  |
| 43 | 1  | 0 | 7.114501  | -0.170614 | -1.070956 |
| 44 | 1  | 0 | 5.201260  | -1.446193 | -1.989528 |

2a-TS2-B-fix-DOWN-A-ext

Method: opt (ts,calcfc,noeigen) freq b3lyp/6-311++g(d,p) scrf(solvent=Chlorof  
SCF Done: E(RB3LYP) = -6223.13721221 A.U. after 1 cycles  
Lowest frequency = -39.2377

Zero-point correction= 0.330575  
(Hartree/Particle)  
Thermal correction to Energy= 0.352562  
Thermal correction to Enthalpy= 0.353506  
Thermal correction to Gibbs Free Energy= 0.276839  
Sum of electronic and zero-point Energies= -6222.806637  
Sum of electronic and thermal Energies= -6222.784650  
Sum of electronic and thermal Enthalpies= -6222.783706  
Sum of electronic and thermal Free Energies= -6222.860373

Standard orientation:

| Center<br>Number | Atomic<br>Number | Atomic<br>Type | Coordinates (Angstroms) |           |           |
|------------------|------------------|----------------|-------------------------|-----------|-----------|
|                  |                  |                | X                       | Y         | Z         |
| 1                | 6                | 0              | 0.092165                | 3.532975  | -0.674255 |
| 2                | 6                | 0              | 1.308909                | 2.974945  | -0.302168 |
| 3                | 6                | 0              | 1.485065                | 1.573943  | -0.275914 |
| 4                | 6                | 0              | 0.344508                | 0.780700  | -0.488895 |
| 5                | 6                | 0              | -0.951025               | 1.323490  | -0.668093 |
| 6                | 6                | 0              | -1.013542               | 2.712017  | -0.863164 |
| 7                | 8                | 0              | 0.506667                | -0.572455 | -0.545681 |
| 8                | 6                | 0              | -0.327930               | -1.156436 | -1.565949 |

|    |    |   |           |           |           |
|----|----|---|-----------|-----------|-----------|
| 9  | 6  | 0 | -1.760135 | -0.844925 | -1.276817 |
| 10 | 6  | 0 | -2.089087 | 0.343905  | -0.729365 |
| 11 | 8  | 0 | 2.358503  | 3.817977  | -0.088712 |
| 12 | 6  | 0 | 3.389069  | 3.294387  | 0.774060  |
| 13 | 6  | 0 | 3.792020  | 1.917707  | 0.345264  |
| 14 | 6  | 0 | 2.868338  | 1.072432  | -0.137555 |
| 15 | 6  | 0 | 3.290339  | -0.271591 | -0.639464 |
| 16 | 6  | 0 | 3.581305  | -1.357089 | 0.192838  |
| 17 | 6  | 0 | 4.029575  | -2.575203 | -0.313552 |
| 18 | 6  | 0 | 4.197086  | -2.727684 | -1.687421 |
| 19 | 6  | 0 | 3.916115  | -1.663244 | -2.542393 |
| 20 | 6  | 0 | 3.469516  | -0.454602 | -2.018331 |
| 21 | 6  | 0 | -3.446312 | 0.619626  | -0.147408 |
| 22 | 6  | 0 | -3.809025 | 1.940493  | 0.199173  |
| 23 | 6  | 0 | -5.049646 | 2.306105  | 0.703904  |
| 24 | 6  | 0 | -6.023892 | 1.339462  | 0.910747  |
| 25 | 6  | 0 | -5.702798 | 0.013187  | 0.652633  |
| 26 | 6  | 0 | -4.446660 | -0.343095 | 0.160885  |
| 27 | 35 | 0 | 3.339119  | -1.227480 | 2.099898  |
| 28 | 35 | 0 | -4.243755 | -2.274918 | 0.095341  |
| 29 | 1  | 0 | 0.017240  | 4.605791  | -0.800455 |
| 30 | 1  | 0 | -1.928436 | 3.180508  | -1.193006 |
| 31 | 1  | 0 | 0.004248  | -0.787548 | -2.547926 |
| 32 | 1  | 0 | -0.142188 | -2.228722 | -1.519927 |
| 33 | 1  | 0 | -2.476558 | -1.627887 | -1.450369 |
| 34 | 1  | 0 | 4.214262  | 4.001438  | 0.702527  |
| 35 | 1  | 0 | 3.014223  | 3.303280  | 1.808454  |
| 36 | 1  | 0 | 4.832927  | 1.628429  | 0.430040  |
| 37 | 1  | 0 | 4.242922  | -3.395302 | 0.359776  |
| 38 | 1  | 0 | 4.547430  | -3.674502 | -2.081815 |
| 39 | 1  | 0 | 4.049103  | -1.771455 | -3.612605 |
| 40 | 1  | 0 | 3.256026  | 0.376498  | -2.681274 |
| 41 | 1  | 0 | -3.080851 | 2.722241  | 0.090756  |
| 42 | 1  | 0 | -5.242194 | 3.346872  | 0.936383  |
| 43 | 1  | 0 | -7.004541 | 1.595918  | 1.293291  |
| 44 | 1  | 0 | -6.426480 | -0.764829 | 0.855355  |

-----  
- 2a-TS3-A-fix-UP-B-ext

Method: opt(ts,calcfc,noeigen) freq b3lyp/6-311++g(d,p) scrf(solvent=Chlorof  
SCF Done: E(RB3LYP) = -6223.13541046 A.U. after 1 cycles  
Lowest frequency = -39.2879

Zero-point correction= 0.330318  
(Hartree/Particle)  
Thermal correction to Energy= 0.352304  
Thermal correction to Enthalpy= 0.353248  
Thermal correction to Gibbs Free Energy= 0.276776  
Sum of electronic and zero-point Energies= -6222.805092  
Sum of electronic and thermal Energies= -6222.783107  
Sum of electronic and thermal Enthalpies= -6222.782163  
Sum of electronic and thermal Free Energies= -6222.858634

Standard orientation:

| Center<br>Number | Atomic<br>Number | Atomic<br>Type | Coordinates (Angstroms) |           |          |
|------------------|------------------|----------------|-------------------------|-----------|----------|
|                  |                  |                | X                       | Y         | Z        |
| 1                | 6                | 0              | 0.713257                | -1.704051 | 1.731598 |
| 2                | 6                | 0              | -0.500517               | -1.641829 | 1.057638 |

|    |    |   |           |           |           |
|----|----|---|-----------|-----------|-----------|
| 3  | 6  | 0 | -0.857845 | -0.542559 | 0.237070  |
| 4  | 6  | 0 | 0.201770  | 0.305749  | -0.134330 |
| 5  | 6  | 0 | 1.472993  | 0.223541  | 0.474939  |
| 6  | 6  | 0 | 1.682117  | -0.748740 | 1.457019  |
| 7  | 8  | 0 | 0.019085  | 1.135028  | -1.209318 |
| 8  | 6  | 0 | 0.820671  | 2.331668  | -1.280753 |
| 9  | 6  | 0 | 2.237417  | 2.103837  | -0.857459 |
| 10 | 6  | 0 | 2.543839  | 1.109295  | -0.014073 |
| 11 | 8  | 0 | -1.355988 | -2.701944 | 1.157935  |
| 12 | 6  | 0 | -1.993442 | -2.959537 | -0.116898 |
| 13 | 6  | 0 | -2.777076 | -1.750400 | -0.516915 |
| 14 | 6  | 0 | -2.289334 | -0.525421 | -0.232003 |
| 15 | 6  | 0 | -3.159084 | 0.694999  | -0.177360 |
| 16 | 6  | 0 | -4.576801 | 0.710174  | -0.077155 |
| 17 | 6  | 0 | -5.309885 | 1.896727  | -0.036748 |
| 18 | 6  | 0 | -4.674514 | 3.131780  | -0.044792 |
| 19 | 6  | 0 | -3.286391 | 3.162544  | -0.062940 |
| 20 | 6  | 0 | -2.569934 | 1.975313  | -0.122084 |
| 21 | 6  | 0 | 3.948986  | 0.909591  | 0.450036  |
| 22 | 6  | 0 | 4.474278  | 1.761288  | 1.433139  |
| 23 | 6  | 0 | 5.780286  | 1.624085  | 1.895788  |
| 24 | 6  | 0 | 6.596053  | 0.620366  | 1.378916  |
| 25 | 6  | 0 | 6.104625  | -0.238679 | 0.398357  |
| 26 | 6  | 0 | 4.795393  | -0.087798 | -0.051688 |
| 27 | 35 | 0 | -5.727603 | -0.839081 | 0.152606  |
| 28 | 35 | 0 | 4.183974  | -1.281592 | -1.432289 |
| 29 | 1  | 0 | 0.908270  | -2.534622 | 2.398110  |
| 30 | 1  | 0 | 2.646391  | -0.810984 | 1.946345  |
| 31 | 1  | 0 | 0.757262  | 2.649211  | -2.321796 |
| 32 | 1  | 0 | 0.349616  | 3.115178  | -0.665281 |
| 33 | 1  | 0 | 2.994312  | 2.777112  | -1.243373 |
| 34 | 1  | 0 | -1.217978 | -3.242689 | -0.842348 |
| 35 | 1  | 0 | -2.647673 | -3.814376 | 0.047696  |
| 36 | 1  | 0 | -3.767286 | -1.905697 | -0.908175 |
| 37 | 1  | 0 | -6.388544 | 1.846202  | 0.026532  |
| 38 | 1  | 0 | -5.260309 | 4.042581  | -0.008978 |
| 39 | 1  | 0 | -2.753077 | 4.105461  | -0.030895 |
| 40 | 1  | 0 | -1.499960 | 2.036788  | -0.140133 |
| 41 | 1  | 0 | 3.834633  | 2.537666  | 1.836990  |
| 42 | 1  | 0 | 6.156969  | 2.297868  | 2.656344  |
| 43 | 1  | 0 | 7.614504  | 0.502540  | 1.730276  |
| 44 | 1  | 0 | 6.733956  | -1.015003 | -0.017134 |

-----  
- 2a-TS1-B-fix-UP-A-int

Method: opt(ts,calcfc,noeigen) freq b3lyp/6-311++g(d,p) scrf(solvent=Chlorof  
SCF Done: E(RB3LYP) = -6223.12446587 A.U. after 1 cycles  
Lowest frequency = -37.2478

|                                              |              |
|----------------------------------------------|--------------|
| Zero-point correction=                       | 0.330357     |
| (Hartree/Particle)                           |              |
| Thermal correction to Energy=                | 0.352279     |
| Thermal correction to Enthalpy=              | 0.353223     |
| Thermal correction to Gibbs Free Energy=     | 0.277296     |
| Sum of electronic and zero-point Energies=   | -6222.794109 |
| Sum of electronic and thermal Energies=      | -6222.772187 |
| Sum of electronic and thermal Enthalpies=    | -6222.771243 |
| Sum of electronic and thermal Free Energies= | -6222.847170 |

Standard orientation:

| Center<br>Number | Atomic<br>Number | Atomic<br>Type | Coordinates (Angstroms) |           |           |
|------------------|------------------|----------------|-------------------------|-----------|-----------|
|                  |                  |                | X                       | Y         | Z         |
| 1                | 6                | 0              | 0.362569                | 2.855512  | -0.713538 |
| 2                | 6                | 0              | -0.979337               | 2.541783  | -0.538674 |
| 3                | 6                | 0              | -1.445912               | 1.221485  | -0.693892 |
| 4                | 6                | 0              | -0.496406               | 0.247462  | -1.046596 |
| 5                | 6                | 0              | 0.895576                | 0.499880  | -1.045748 |
| 6                | 6                | 0              | 1.279535                | 1.842047  | -0.967023 |
| 7                | 8                | 0              | -0.942605               | -0.976990 | -1.463288 |
| 8                | 6                | 0              | -0.169337               | -1.419589 | -2.599469 |
| 9                | 6                | 0              | 1.265679                | -1.544653 | -2.201913 |
| 10               | 6                | 0              | 1.791308                | -0.675874 | -1.306882 |
| 11               | 8                | 0              | -1.840869               | 3.553787  | -0.217860 |
| 12               | 6                | 0              | -3.174759               | 3.410747  | -0.741812 |
| 13               | 6                | 0              | -3.713498               | 2.032975  | -0.504751 |
| 14               | 6                | 0              | -2.887761               | 0.973334  | -0.493615 |
| 15               | 6                | 0              | -3.445783               | -0.387451 | -0.240938 |
| 16               | 6                | 0              | -3.180536               | -1.137648 | 0.911655  |
| 17               | 6                | 0              | -3.745515               | -2.392811 | 1.121444  |
| 18               | 6                | 0              | -4.607905               | -2.927454 | 0.167240  |
| 19               | 6                | 0              | -4.905794               | -2.198300 | -0.981882 |
| 20               | 6                | 0              | -4.330224               | -0.946615 | -1.175631 |
| 21               | 6                | 0              | 3.078733                | -1.069374 | -0.605632 |
| 22               | 6                | 0              | 3.397437                | -2.454071 | -0.684485 |
| 23               | 6                | 0              | 4.569051                | -3.024542 | -0.219135 |
| 24               | 6                | 0              | 5.517194                | -2.229098 | 0.414468  |
| 25               | 6                | 0              | 5.219945                | -0.891189 | 0.610793  |
| 26               | 6                | 0              | 4.024999                | -0.327329 | 0.144314  |
| 27               | 35               | 0              | -2.052148               | -0.434760 | 2.305529  |
| 28               | 35               | 0              | 3.855956                | 1.494798  | 0.774790  |
| 29               | 1                | 0              | 0.676387                | 3.890495  | -0.660560 |
| 30               | 1                | 0              | 2.305811                | 2.114656  | -1.143265 |
| 31               | 1                | 0              | -0.582380               | -2.388326 | -2.878823 |
| 32               | 1                | 0              | -0.331452               | -0.717288 | -3.430426 |
| 33               | 1                | 0              | 1.802329                | -2.401940 | -2.581315 |
| 34               | 1                | 0              | -3.768804               | 4.167719  | -0.230663 |
| 35               | 1                | 0              | -3.158271               | 3.657079  | -1.814949 |
| 36               | 1                | 0              | -4.776667               | 1.918873  | -0.326467 |
| 37               | 1                | 0              | -3.521068               | -2.941651 | 2.026929  |
| 38               | 1                | 0              | -5.046424               | -3.905114 | 0.330304  |
| 39               | 1                | 0              | -5.581089               | -2.602836 | -1.726915 |
| 40               | 1                | 0              | -4.548594               | -0.384079 | -2.075903 |
| 41               | 1                | 0              | 2.666932                | -3.124233 | -1.108091 |
| 42               | 1                | 0              | 4.723168                | -4.091109 | -0.333043 |
| 43               | 1                | 0              | 6.446832                | -2.641361 | 0.787978  |
| 44               | 1                | 0              | 5.912251                | -0.261966 | 1.153420  |

2a-TS4-A-fix-UP-B-int

Method: opt(ts,calcfc,noeigen) freq b3lyp/6-311++g(d,p) scrf(solvent=Chlorof  
SCF Done: E(RB3LYP) = -6223.11744683 A.U. after 1 cycles  
Lowest frequency = -28.4483

Zero-point correction= 0.329895  
(Hartree/Particle)  
Thermal correction to Energy= 0.351921  
Thermal correction to Enthalpy= 0.352865  
Thermal correction to Gibbs Free Energy= 0.275906  
Sum of electronic and zero-point Energies= -6222.787552



Sum of electronic and thermal Energies= -6222.765526  
Sum of electronic and thermal Enthalpies= -6222.764582  
Sum of electronic and thermal Free Energies= -6222.841541

Standard orientation:

| Center<br>Number | Atomic<br>Number | Atomic<br>Type | Coordinates (Angstroms) |           |           |
|------------------|------------------|----------------|-------------------------|-----------|-----------|
|                  |                  |                | X                       | Y         | Z         |
| 1                | 6                | 0              | 0.252815                | 2.443589  | -1.551308 |
| 2                | 6                | 0              | -0.993401               | 2.406113  | -0.934224 |
| 3                | 6                | 0              | -1.389998               | 1.337845  | -0.092067 |
| 4                | 6                | 0              | -0.333888               | 0.582663  | 0.444390  |
| 5                | 6                | 0              | 0.941579                | 0.574629  | -0.170991 |
| 6                | 6                | 0              | 1.191671                | 1.477385  | -1.208923 |
| 7                | 8                | 0              | -0.564547               | -0.122503 | 1.574845  |
| 8                | 6                | 0              | 0.579381                | -0.527760 | 2.357164  |
| 9                | 6                | 0              | 1.723561                | -0.983187 | 1.506719  |
| 10               | 6                | 0              | 1.922234                | -0.410868 | 0.311380  |
| 11               | 8                | 0              | -1.836675               | 3.476457  | -1.062303 |
| 12               | 6                | 0              | -2.497540               | 3.737033  | 0.209618  |
| 13               | 6                | 0              | -3.336133               | 2.544592  | 0.549589  |
| 14               | 6                | 0              | -2.846344               | 1.316263  | 0.268304  |
| 15               | 6                | 0              | -3.856358               | 0.229451  | -0.046084 |
| 16               | 6                | 0              | -3.820506               | -1.180165 | 0.066593  |
| 17               | 6                | 0              | -4.931575               | -1.978508 | -0.229235 |
| 18               | 6                | 0              | -6.116442               | -1.429076 | -0.694301 |
| 19               | 6                | 0              | -6.171181               | -0.056639 | -0.904623 |
| 20               | 6                | 0              | -5.066959               | 0.725276  | -0.604663 |
| 21               | 6                | 0              | 3.062114                | -0.801570 | -0.569632 |
| 22               | 6                | 0              | 2.816850                | -1.623057 | -1.681539 |
| 23               | 6                | 0              | 3.842259                | -2.035973 | -2.525000 |
| 24               | 6                | 0              | 5.150804                | -1.622741 | -2.278565 |
| 25               | 6                | 0              | 5.424811                | -0.797231 | -1.192094 |
| 26               | 6                | 0              | 4.384583                | -0.395137 | -0.355176 |
| 27               | 35               | 0              | -2.295698               | -2.243466 | 0.560291  |
| 28               | 35               | 0              | 4.835063                | 0.776103  | 1.108569  |
| 29               | 1                | 0              | 0.488925                | 3.252005  | -2.231507 |
| 30               | 1                | 0              | 2.161187                | 1.474736  | -1.692489 |
| 31               | 1                | 0              | 0.871446                | 0.323207  | 2.990735  |
| 32               | 1                | 0              | 0.211345                | -1.321672 | 3.007316  |
| 33               | 1                | 0              | 2.388751                | -1.743705 | 1.898368  |
| 34               | 1                | 0              | -1.725401               | 3.971237  | 0.953732  |
| 35               | 1                | 0              | -3.112455               | 4.620573  | 0.046536  |
| 36               | 1                | 0              | -4.372618               | 2.707305  | 0.815168  |
| 37               | 1                | 0              | -4.849748               | -3.049281 | -0.100092 |
| 38               | 1                | 0              | -6.960743               | -2.070026 | -0.918827 |
| 39               | 1                | 0              | -7.056191               | 0.408194  | -1.322977 |
| 40               | 1                | 0              | -5.121080               | 1.776515  | -0.842944 |
| 41               | 1                | 0              | 1.798132                | -1.941851 | -1.870899 |
| 42               | 1                | 0              | 3.621093                | -2.677582 | -3.369842 |
| 43               | 1                | 0              | 5.959424                | -1.936394 | -2.928491 |
| 44               | 1                | 0              | 6.435920                | -0.464759 | -0.996240 |

2a-TS1-B-fix-DOWN-A-int

Method: opt(ts,calcfc,noeigen) freq b3lyp/6-311++g(d,p) scrf(solvent=Chlorof  
SCF Done: E(RB3LYP) = -6223.12454746 A.U. after 1 cycles  
Lowest frequency = -37.0681

Zero-point correction= 0.330348  
 (Hartree/Particle)  
 Thermal correction to Energy= 0.352311  
 Thermal correction to Enthalpy= 0.353256  
 Thermal correction to Gibbs Free Energy= 0.276848  
 Sum of electronic and zero-point Energies= -6222.794199  
 Sum of electronic and thermal Energies= -6222.772236  
 Sum of electronic and thermal Enthalpies= -6222.771292  
 Sum of electronic and thermal Free Energies= -6222.847699

Standard orientation:

| Center<br>Number | Atomic<br>Number | Atomic<br>Type | Coordinates (Angstroms) |           |           |
|------------------|------------------|----------------|-------------------------|-----------|-----------|
|                  |                  |                | X                       | Y         | Z         |
| 1                | 6                | 0              | 0.750749                | 2.821300  | -0.462131 |
| 2                | 6                | 0              | -0.546574               | 2.576400  | -0.029558 |
| 3                | 6                | 0              | -1.059670               | 1.265075  | 0.028232  |
| 4                | 6                | 0              | -0.207085               | 0.226759  | -0.385736 |
| 5                | 6                | 0              | 1.168249                | 0.425752  | -0.651009 |
| 6                | 6                | 0              | 1.587352                | 1.754613  | -0.770253 |
| 7                | 8                | 0              | -0.747276               | -1.010999 | -0.602132 |
| 8                | 6                | 0              | -0.199293               | -1.579065 | -1.811702 |
| 9                | 6                | 0              | 1.280641                | -1.723133 | -1.662473 |
| 10               | 6                | 0              | 1.976963                | -0.801369 | -0.956930 |
| 11               | 8                | 0              | -1.318102               | 3.644242  | 0.334280  |
| 12               | 6                | 0              | -2.730024               | 3.494833  | 0.083585  |
| 13               | 6                | 0              | -3.234413               | 2.168842  | 0.564016  |
| 14               | 6                | 0              | -2.443696               | 1.085968  | 0.507386  |
| 15               | 6                | 0              | -2.910141               | -0.219981 | 1.061201  |
| 16               | 6                | 0              | -3.914998               | -1.004426 | 0.484356  |
| 17               | 6                | 0              | -4.351296               | -2.191807 | 1.068694  |
| 18               | 6                | 0              | -3.775932               | -2.622964 | 2.260782  |
| 19               | 6                | 0              | -2.767378               | -1.867200 | 2.856174  |
| 20               | 6                | 0              | -2.345063               | -0.685201 | 2.258455  |
| 21               | 6                | 0              | 3.360267                | -1.180728 | -0.461101 |
| 22               | 6                | 0              | 3.630451                | -2.577933 | -0.467552 |
| 23               | 6                | 0              | 4.854406                | -3.148768 | -0.166163 |
| 24               | 6                | 0              | 5.917235                | -2.336962 | 0.214091  |
| 25               | 6                | 0              | 5.688213                | -0.976941 | 0.336092  |
| 26               | 6                | 0              | 4.441037                | -0.412000 | 0.038304  |
| 27               | 35               | 0              | -4.722246               | -0.508709 | -1.196305 |
| 28               | 35               | 0              | 4.425439                | 1.463275  | 0.517731  |
| 29               | 1                | 0              | 1.091062                | 3.843983  | -0.565935 |
| 30               | 1                | 0              | 2.571659                | 1.971417  | -1.148059 |
| 31               | 1                | 0              | -0.676670               | -2.551882 | -1.923506 |
| 32               | 1                | 0              | -0.492646               | -0.946087 | -2.661732 |
| 33               | 1                | 0              | 1.722420                | -2.628793 | -2.051909 |
| 34               | 1                | 0              | -3.205422               | 4.321992  | 0.609572  |
| 35               | 1                | 0              | -2.909780               | 3.626151  | -0.994626 |
| 36               | 1                | 0              | -4.244004               | 2.111361  | 0.953805  |
| 37               | 1                | 0              | -5.129096               | -2.774788 | 0.592716  |
| 38               | 1                | 0              | -4.115742               | -3.546166 | 2.715710  |
| 39               | 1                | 0              | -2.313264               | -2.194919 | 3.784038  |
| 40               | 1                | 0              | -1.562663               | -0.095137 | 2.722479  |
| 41               | 1                | 0              | 2.822126                | -3.254740 | -0.693021 |
| 42               | 1                | 0              | 4.963490                | -4.226105 | -0.207587 |
| 43               | 1                | 0              | 6.890062                | -2.749415 | 0.453193  |

44 1 0 6.479779 -0.329014 0.687203

- 2a-TS3-A-fix-DOWN-B-ext

Method: opt(ts,calcfc,noeigen) freq b3lyp/6-311++g(d,p) scrf(solvent=Chlorof  
SCF Done: E(RB3LYP) = -6223.13525737 A.U. after 1 cycles  
Lowest frequency = -39.5397

Zero-point correction= 0.330280  
(Hartree/Particle)  
Thermal correction to Energy= 0.352304  
Thermal correction to Enthalpy= 0.353248  
Thermal correction to Gibbs Free Energy= 0.276370  
Sum of electronic and zero-point Energies= -6222.804977  
Sum of electronic and thermal Energies= -6222.782953  
Sum of electronic and thermal Enthalpies= -6222.782009  
Sum of electronic and thermal Free Energies= -6222.858887

Standard orientation:

| Center<br>Number | Atomic<br>Number | Atomic<br>Type | Coordinates (Angstroms) |           |           |
|------------------|------------------|----------------|-------------------------|-----------|-----------|
|                  |                  |                | X                       | Y         | Z         |
| 1                | 6                | 0              | -0.612676               | -2.301828 | -1.192385 |
| 2                | 6                | 0              | 0.662006                | -2.062523 | -0.692976 |
| 3                | 6                | 0              | 0.954450                | -0.955201 | 0.141691  |
| 4                | 6                | 0              | -0.161055               | -0.313378 | 0.711046  |
| 5                | 6                | 0              | -1.477529               | -0.572700 | 0.270499  |
| 6                | 6                | 0              | -1.670209               | -1.531339 | -0.728627 |
| 7                | 8                | 0              | 0.045907                | 0.471894  | 1.814040  |
| 8                | 6                | 0              | -0.924043               | 1.495758  | 2.115292  |
| 9                | 6                | 0              | -2.330091               | 1.055405  | 1.859252  |
| 10               | 6                | 0              | -2.592937               | 0.100891  | 0.957679  |
| 11               | 8                | 0              | 1.653191                | -2.957609 | -0.980616 |
| 12               | 6                | 0              | 2.505222                | -3.158043 | 0.173237  |
| 13               | 6                | 0              | 3.132978                | -1.852077 | 0.543078  |
| 14               | 6                | 0              | 2.416805                | -0.716581 | 0.411639  |
| 15               | 6                | 0              | 3.059103                | 0.635676  | 0.321709  |
| 16               | 6                | 0              | 4.424394                | 0.895850  | 0.024677  |
| 17               | 6                | 0              | 4.942270                | 2.190124  | -0.034759 |
| 18               | 6                | 0              | 4.124504                | 3.297618  | 0.149253  |
| 19               | 6                | 0              | 2.768252                | 3.091511  | 0.364360  |
| 20               | 6                | 0              | 2.269499                | 1.798504  | 0.439996  |
| 21               | 6                | 0              | -3.999214               | -0.323033 | 0.682174  |
| 22               | 6                | 0              | -4.585256               | -1.325266 | 1.469519  |
| 23               | 6                | 0              | -5.896582               | -1.741896 | 1.261246  |
| 24               | 6                | 0              | -6.655139               | -1.162145 | 0.246028  |
| 25               | 6                | 0              | -6.100109               | -0.167387 | -0.554819 |
| 26               | 6                | 0              | -4.785886               | 0.238042  | -0.330629 |
| 27               | 35               | 0              | 5.761435                | -0.423912 | -0.473496 |
| 28               | 35               | 0              | -4.073086               | 1.621936  | -1.465519 |
| 29               | 1                | 0              | -0.768977               | -3.126404 | -1.876322 |
| 30               | 1                | 0              | -2.673027               | -1.735086 | -1.083208 |
| 31               | 1                | 0              | -0.759937               | 1.736461  | 3.166081  |
| 32               | 1                | 0              | -0.686985               | 2.397158  | 1.527550  |
| 33               | 1                | 0              | -3.122573               | 1.570502  | 2.390109  |
| 34               | 1                | 0              | 1.901945                | -3.601099 | 0.978144  |
| 35               | 1                | 0              | 3.257879                | -3.880989 | -0.137794 |
| 36               | 1                | 0              | 4.181966                | -1.853964 | 0.782769  |
| 37               | 1                | 0              | 5.992968                | 2.326408  | -0.252759 |

|    |   |   |           |           |           |
|----|---|---|-----------|-----------|-----------|
| 38 | 1 | 0 | 4.543512  | 4.295376  | 0.095168  |
| 39 | 1 | 0 | 2.091094  | 3.930664  | 0.472832  |
| 40 | 1 | 0 | 1.218205  | 1.677515  | 0.611298  |
| 41 | 1 | 0 | -3.991189 | -1.775860 | 2.256402  |
| 42 | 1 | 0 | -6.323363 | -2.515171 | 1.889112  |
| 43 | 1 | 0 | -7.677459 | -1.477935 | 0.073584  |
| 44 | 1 | 0 | -6.681602 | 0.291422  | -1.343907 |

-----  
- 2a-TS2-B-fix-UP-A-ext

Method: opt(ts,calcfc,noeigen) freq b3lyp/6-311++g(d,p) scrf(solvent=Chlorof  
SCF Done: E(RB3LYP) = -6223.13787337 A.U. after 1 cycles  
Lowest frequency = -38.2596

Zero-point correction= 0.330618  
(Hartree/Particle)  
Thermal correction to Energy= 0.352574  
Thermal correction to Enthalpy= 0.353519  
Thermal correction to Gibbs Free Energy= 0.277295  
Sum of electronic and zero-point Energies= -6222.807255  
Sum of electronic and thermal Energies= -6222.785299  
Sum of electronic and thermal Enthalpies= -6222.784355  
Sum of electronic and thermal Free Energies= -6222.860579

Standard orientation:

| Center<br>Number | Atomic<br>Number | Atomic<br>Type | Coordinates (Angstroms) |           |           |
|------------------|------------------|----------------|-------------------------|-----------|-----------|
|                  |                  |                | X                       | Y         | Z         |
| 1                | 6                | 0              | -0.374523               | 3.251928  | 0.442056  |
| 2                | 6                | 0              | -1.441135               | 2.702041  | -0.257967 |
| 3                | 6                | 0              | -1.499830               | 1.316271  | -0.518913 |
| 4                | 6                | 0              | -0.371510               | 0.552162  | -0.176586 |
| 5                | 6                | 0              | 0.816239                | 1.121469  | 0.343076  |
| 6                | 6                | 0              | 0.730399                | 2.464110  | 0.742760  |
| 7                | 8                | 0              | -0.439235               | -0.801560 | -0.335631 |
| 8                | 6                | 0              | 0.226273                | -1.490099 | 0.744177  |
| 9                | 6                | 0              | 1.659741                | -1.072948 | 0.792211  |
| 10               | 6                | 0              | 1.993838                | 0.200560  | 0.496403  |
| 11               | 8                | 0              | -2.485343               | 3.519398  | -0.576368 |
| 12               | 6                | 0              | -3.244227               | 3.104659  | -1.728918 |
| 13               | 6                | 0              | -3.613245               | 1.656190  | -1.633737 |
| 14               | 6                | 0              | -2.772343               | 0.784838  | -1.052906 |
| 15               | 6                | 0              | -3.176786               | -0.649539 | -0.949121 |
| 16               | 6                | 0              | -3.573389               | -1.257022 | 0.248126  |
| 17               | 6                | 0              | -3.991810               | -2.583367 | 0.301430  |
| 18               | 6                | 0              | -4.024448               | -3.339595 | -0.868535 |
| 19               | 6                | 0              | -3.648857               | -2.759957 | -2.078094 |
| 20               | 6                | 0              | -3.234654               | -1.431560 | -2.111263 |
| 21               | 6                | 0              | 3.411122                | 0.629343  | 0.242642  |
| 22               | 6                | 0              | 3.727451                | 2.004355  | 0.166437  |
| 23               | 6                | 0              | 5.008271                | 2.504761  | -0.024924 |
| 24               | 6                | 0              | 6.077230                | 1.631355  | -0.169689 |
| 25               | 6                | 0              | 5.818936                | 0.266790  | -0.170773 |
| 26               | 6                | 0              | 4.524639                | -0.223133 | 0.006589  |
| 27               | 35               | 0              | -3.588866               | -0.253529 | 1.893277  |
| 28               | 35               | 0              | 4.466430                | -2.150134 | -0.240794 |
| 29               | 1                | 0              | -0.411051               | 4.294599  | 0.731755  |
| 30               | 1                | 0              | 1.521065                | 2.916851  | 1.321955  |
| 31               | 1                | 0              | -0.314969               | -1.283538 | 1.678708  |

|    |   |   |           |           |           |
|----|---|---|-----------|-----------|-----------|
| 32 | 1 | 0 | 0.132200  | -2.551248 | 0.517145  |
| 33 | 1 | 0 | 2.387869  | -1.838624 | 0.992104  |
| 34 | 1 | 0 | -4.124177 | 3.746355  | -1.743507 |
| 35 | 1 | 0 | -2.650106 | 3.313751  | -2.631393 |
| 36 | 1 | 0 | -4.575018 | 1.338245  | -2.019226 |
| 37 | 1 | 0 | -4.296842 | -3.017626 | 1.244849  |
| 38 | 1 | 0 | -4.349157 | -4.372870 | -0.828638 |
| 39 | 1 | 0 | -3.676854 | -3.338920 | -2.993856 |
| 40 | 1 | 0 | -2.932627 | -0.981704 | -3.049828 |
| 41 | 1 | 0 | 2.932395  | 2.722561  | 0.239165  |
| 42 | 1 | 0 | 5.158748  | 3.577218  | -0.063871 |
| 43 | 1 | 0 | 7.089065  | 1.992438  | -0.309677 |
| 44 | 1 | 0 | 6.627037  | -0.433658 | -0.333497 |

### Compound 1b:

1b-anti-GS1

Method: opt freq b3lyp/6-31+g(d,p) scrf(solvent=Chloroform)

SCF Done: E(RB3LYP) = -1461.81839842 A.U. after 1 cycles

Lowest frequency = 14.0019

Zero-point correction= 0.499875  
(Hartree/Particle)  
Thermal correction to Energy= 0.528862  
Thermal correction to Enthalpy= 0.529806  
Thermal correction to Gibbs Free Energy= 0.438317  
Sum of electronic and zero-point Energies= -1461.318523  
Sum of electronic and thermal Energies= -1461.289537  
Sum of electronic and thermal Enthalpies= -1461.288592  
Sum of electronic and thermal Free Energies= -1461.380081

Standard orientation:

| Center<br>Number | Atomic<br>Number | Atomic<br>Type | Coordinates (Angstroms) |           |           |
|------------------|------------------|----------------|-------------------------|-----------|-----------|
|                  |                  |                | X                       | Y         | Z         |
| 1                | 6                | 0              | 1.023082                | 3.039608  | 0.632382  |
| 2                | 6                | 0              | 1.057313                | 1.626073  | 0.622980  |
| 3                | 6                | 0              | 2.228538                | 0.954733  | 1.217919  |
| 4                | 6                | 0              | 3.060423                | 1.689030  | 1.980089  |
| 5                | 6                | 0              | 0.000000                | 3.744627  | 0.000000  |
| 6                | 6                | 0              | 0.000000                | 0.950656  | 0.000000  |
| 7                | 6                | 0              | -1.057313               | 1.626073  | -0.622980 |
| 8                | 6                | 0              | -1.023082               | 3.039607  | -0.632382 |
| 9                | 6                | 0              | -3.060423               | 1.689030  | -1.980089 |
| 10               | 6                | 0              | -2.228538               | 0.954733  | -1.217919 |
| 11               | 1                | 0              | 0.000000                | 4.829031  | 0.000000  |
| 12               | 1                | 0              | 3.948286                | 1.254617  | 2.430844  |
| 13               | 1                | 0              | 0.000000                | -0.134723 | 0.000000  |
| 14               | 1                | 0              | -3.948286               | 1.254617  | -2.430844 |
| 15               | 8                | 0              | -2.041510               | 3.766519  | -1.183990 |
| 16               | 8                | 0              | 2.041510                | 3.766519  | 1.183990  |
| 17               | 6                | 0              | -2.757150               | 3.131900  | -2.266138 |
| 18               | 1                | 0              | -3.667979               | 3.721269  | -2.389120 |
| 19               | 1                | 0              | -2.156936               | 3.238603  | -3.185491 |
| 20               | 6                | 0              | 2.757150                | 3.131900  | 2.266138  |
| 21               | 1                | 0              | 3.667979                | 3.721269  | 2.389120  |
| 22               | 1                | 0              | 2.156935                | 3.238603  | 3.185491  |

|    |   |   |           |           |           |
|----|---|---|-----------|-----------|-----------|
| 23 | 6 | 0 | -2.475777 | -0.499122 | -0.952897 |
| 24 | 6 | 0 | -3.116264 | -0.896506 | 0.269803  |
| 25 | 6 | 0 | -2.084567 | -1.456594 | -1.884690 |
| 26 | 6 | 0 | -3.536802 | 0.044345  | 1.254094  |
| 27 | 6 | 0 | -3.355652 | -2.288241 | 0.520946  |
| 28 | 6 | 0 | -2.332855 | -2.831685 | -1.612044 |
| 29 | 6 | 0 | -4.153150 | -0.367305 | 2.417779  |
| 30 | 1 | 0 | -3.371549 | 1.101875  | 1.078437  |
| 31 | 6 | 0 | -3.995308 | -2.680971 | 1.729732  |
| 32 | 6 | 0 | -2.947317 | -3.239353 | -0.451588 |
| 33 | 6 | 0 | -4.386369 | -1.743864 | 2.661764  |
| 34 | 1 | 0 | -4.464427 | 0.369345  | 3.152949  |
| 35 | 1 | 0 | -4.172180 | -3.739277 | 1.904632  |
| 36 | 1 | 0 | -4.874622 | -2.055509 | 3.580518  |
| 37 | 6 | 0 | 2.475777  | -0.499122 | 0.952896  |
| 38 | 6 | 0 | 3.116264  | -0.896506 | -0.269803 |
| 39 | 6 | 0 | 2.084566  | -1.456594 | 1.884690  |
| 40 | 6 | 0 | 3.536803  | 0.044345  | -1.254094 |
| 41 | 6 | 0 | 3.355652  | -2.288241 | -0.520946 |
| 42 | 6 | 0 | 2.332854  | -2.831685 | 1.612044  |
| 43 | 6 | 0 | 4.153151  | -0.367305 | -2.417778 |
| 44 | 1 | 0 | 3.371550  | 1.101875  | -1.078437 |
| 45 | 6 | 0 | 3.995309  | -2.680971 | -1.729731 |
| 46 | 6 | 0 | 2.947317  | -3.239353 | 0.451587  |
| 47 | 6 | 0 | 4.386371  | -1.743863 | -2.661763 |
| 48 | 1 | 0 | 4.464429  | 0.369345  | -3.152948 |
| 49 | 1 | 0 | 4.172181  | -3.739277 | -1.904632 |
| 50 | 1 | 0 | 4.874624  | -2.055509 | -3.580517 |
| 51 | 1 | 0 | 3.123377  | -4.295557 | 0.264202  |
| 52 | 1 | 0 | 2.019899  | -3.571463 | 2.344220  |
| 53 | 1 | 0 | -3.123377 | -4.295557 | -0.264202 |
| 54 | 1 | 0 | -2.019900 | -3.571463 | -2.344220 |
| 55 | 6 | 0 | 1.409156  | -1.085173 | 3.187205  |
| 56 | 1 | 0 | 0.880623  | -1.946014 | 3.606209  |
| 57 | 1 | 0 | 2.140729  | -0.751738 | 3.933342  |
| 58 | 1 | 0 | 0.689239  | -0.272549 | 3.057880  |
| 59 | 6 | 0 | -1.409157 | -1.085173 | -3.187206 |
| 60 | 1 | 0 | -0.880621 | -1.946013 | -3.606208 |
| 61 | 1 | 0 | -2.140732 | -0.751743 | -3.933343 |
| 62 | 1 | 0 | -0.689244 | -0.272546 | -3.057882 |

-----

1b-anti-GS2

Method: opt freq b3lyp/6-31+g(d,p) scrf(solvent=Chloroform)  
 SCF Done: E(RB3LYP) = -1461.81815460 A.U. after 1 cycles  
 Lowest frequency = 12.7558

Zero-point correction= 0.499697  
 (Hartree/Particle)  
 Thermal correction to Energy= 0.528776  
 Thermal correction to Enthalpy= 0.529720  
 Thermal correction to Gibbs Free Energy= 0.437218  
 Sum of electronic and zero-point Energies= -1461.318457  
 Sum of electronic and thermal Energies= -1461.289379  
 Sum of electronic and thermal Enthalpies= -1461.288435  
 Sum of electronic and thermal Free Energies= -1461.380936

Standard orientation:

-----

| Center<br>Number | Atomic<br>Number | Atomic<br>Type | Coordinates (Angstroms) |           |           |
|------------------|------------------|----------------|-------------------------|-----------|-----------|
|                  |                  |                | X                       | Y         | Z         |
| 1                | 6                | 0              | 1.199526                | 3.277894  | -0.088545 |
| 2                | 6                | 0              | 1.221955                | 1.864318  | -0.114526 |
| 3                | 6                | 0              | 2.519904                | 1.193058  | -0.316030 |
| 4                | 6                | 0              | 3.640419                | 1.928013  | -0.185873 |
| 5                | 6                | 0              | 0.000000                | 3.982765  | 0.000000  |
| 6                | 6                | 0              | 0.000000                | 1.188622  | 0.000000  |
| 7                | 6                | 0              | -1.221955               | 1.864318  | 0.114526  |
| 8                | 6                | 0              | -1.199526               | 3.277894  | 0.088545  |
| 9                | 6                | 0              | -3.640419               | 1.928013  | 0.185873  |
| 10               | 6                | 0              | -2.519904               | 1.193058  | 0.316030  |
| 11               | 1                | 0              | 0.000000                | 5.067217  | 0.000000  |
| 12               | 1                | 0              | 4.624460                | 1.491315  | -0.331809 |
| 13               | 1                | 0              | 0.000000                | 0.103306  | 0.000000  |
| 14               | 1                | 0              | -4.624460               | 1.491314  | 0.331809  |
| 15               | 8                | 0              | -2.347259               | 4.005278  | 0.240844  |
| 16               | 8                | 0              | 2.347259                | 4.005278  | -0.240844 |
| 17               | 6                | 0              | -3.563027               | 3.373370  | -0.214707 |
| 18               | 1                | 0              | -4.371502               | 3.960140  | 0.226090  |
| 19               | 1                | 0              | -3.621016               | 3.486873  | -1.310560 |
| 20               | 6                | 0              | 3.563027                | 3.373370  | 0.214707  |
| 21               | 1                | 0              | 4.371501                | 3.960141  | -0.226090 |
| 22               | 1                | 0              | 3.621015                | 3.486874  | 1.310560  |
| 23               | 6                | 0              | -2.566726               | -0.259417 | 0.681707  |
| 24               | 6                | 0              | -2.779266               | -1.241613 | -0.343085 |
| 25               | 6                | 0              | -2.406291               | -0.650597 | 2.009278  |
| 26               | 6                | 0              | -2.927076               | -0.897609 | -1.719114 |
| 27               | 6                | 0              | -2.839103               | -2.630634 | 0.014182  |
| 28               | 6                | 0              | -2.468331               | -2.032708 | 2.337168  |
| 29               | 6                | 0              | -3.130712               | -1.866135 | -2.679721 |
| 30               | 1                | 0              | -2.878766               | 0.146343  | -2.009253 |
| 31               | 6                | 0              | -3.055184               | -3.605201 | -1.000300 |
| 32               | 6                | 0              | -2.679846               | -2.994752 | 1.376483  |
| 33               | 6                | 0              | -3.199176               | -3.235739 | -2.319842 |
| 34               | 1                | 0              | -3.238499               | -1.578156 | -3.721619 |
| 35               | 1                | 0              | -3.102406               | -4.652578 | -0.712842 |
| 36               | 1                | 0              | -3.362698               | -3.988862 | -3.085132 |
| 37               | 6                | 0              | 2.566726                | -0.259417 | -0.681707 |
| 38               | 6                | 0              | 2.779266                | -1.241613 | 0.343085  |
| 39               | 6                | 0              | 2.406291                | -0.650597 | -2.009278 |
| 40               | 6                | 0              | 2.927076                | -0.897609 | 1.719114  |
| 41               | 6                | 0              | 2.839103                | -2.630634 | -0.014182 |
| 42               | 6                | 0              | 2.468331                | -2.032708 | -2.337168 |
| 43               | 6                | 0              | 3.130712                | -1.866134 | 2.679721  |
| 44               | 1                | 0              | 2.878766                | 0.146343  | 2.009253  |
| 45               | 6                | 0              | 3.055185                | -3.605201 | 1.000300  |
| 46               | 6                | 0              | 2.679847                | -2.994751 | -1.376483 |
| 47               | 6                | 0              | 3.199176                | -3.235739 | 2.319842  |
| 48               | 1                | 0              | 3.238499                | -1.578156 | 3.721619  |
| 49               | 1                | 0              | 3.102406                | -4.652577 | 0.712842  |
| 50               | 1                | 0              | 3.362699                | -3.988861 | 3.085133  |
| 51               | 1                | 0              | 2.723902                | -4.045550 | -1.651126 |
| 52               | 1                | 0              | 2.346154                | -2.326944 | -3.376214 |
| 53               | 1                | 0              | -2.723902               | -4.045550 | 1.651126  |
| 54               | 1                | 0              | -2.346154               | -2.326944 | 3.376214  |
| 55               | 6                | 0              | 2.182265                | 0.358987  | -3.112988 |
| 56               | 1                | 0              | 2.040565                | -0.141551 | -4.074384 |
| 57               | 1                | 0              | 1.298972                | 0.977375  | -2.919982 |

|    |   |   |           |           |           |
|----|---|---|-----------|-----------|-----------|
| 58 | 1 | 0 | 3.033255  | 1.042542  | -3.208425 |
| 59 | 6 | 0 | -2.182265 | 0.358987  | 3.112988  |
| 60 | 1 | 0 | -2.040566 | -0.141551 | 4.074384  |
| 61 | 1 | 0 | -1.298972 | 0.977374  | 2.919982  |
| 62 | 1 | 0 | -3.033255 | 1.042542  | 3.208424  |

-----  
1b-anti-GS3

Method: opt freq b3lyp/6-31+g(d,p) scrf(solvent=Chloroform)

SCF Done: E(RB3LYP) = -1461.81827116 A.U. after 1 cycles

Lowest frequency = 10.8279

|                                              |              |
|----------------------------------------------|--------------|
| Zero-point correction=                       | 0.499717     |
| (Hartree/Particle)                           |              |
| Thermal correction to Energy=                | 0.528773     |
| Thermal correction to Enthalpy=              | 0.529717     |
| Thermal correction to Gibbs Free Energy=     | 0.437397     |
| Sum of electronic and zero-point Energies=   | -1461.318554 |
| Sum of electronic and thermal Energies=      | -1461.289498 |
| Sum of electronic and thermal Enthalpies=    | -1461.288554 |
| Sum of electronic and thermal Free Energies= | -1461.380874 |

Standard orientation:

| Center<br>Number | Atomic<br>Number | Atomic<br>Type | Coordinates (Angstroms) |           |           |
|------------------|------------------|----------------|-------------------------|-----------|-----------|
|                  |                  |                | X                       | Y         | Z         |
| 1                | 6                | 0              | -0.754183               | 3.279893  | -0.466009 |
| 2                | 6                | 0              | -0.986965               | 1.898407  | -0.275330 |
| 3                | 6                | 0              | -2.304478               | 1.355770  | -0.656994 |
| 4                | 6                | 0              | -3.301787               | 2.226544  | -0.901263 |
| 5                | 6                | 0              | 0.490144                | 3.849641  | -0.199693 |
| 6                | 6                | 0              | 0.071797                | 1.117415  | 0.205838  |
| 7                | 6                | 0              | 1.328735                | 1.659485  | 0.503812  |
| 8                | 6                | 0              | 1.514388                | 3.046184  | 0.299496  |
| 9                | 6                | 0              | 3.569239                | 1.517171  | 1.408251  |
| 10               | 6                | 0              | 2.486387                | 0.861376  | 0.950419  |
| 11               | 1                | 0              | 0.653956                | 4.909228  | -0.361762 |
| 12               | 1                | 0              | -4.291190               | 1.886873  | -1.194697 |
| 13               | 1                | 0              | -0.080207               | 0.050103  | 0.331537  |
| 14               | 1                | 0              | 4.458434                | 0.984812  | 1.734085  |
| 15               | 8                | 0              | 2.729698                | 3.634523  | 0.514846  |
| 16               | 8                | 0              | -1.720962               | 4.093391  | -0.988248 |
| 17               | 6                | 0              | 3.561493                | 3.014902  | 1.520053  |
| 18               | 1                | 0              | 3.203106                | 3.339376  | 2.511619  |
| 19               | 1                | 0              | 4.556190                | 3.438308  | 1.367248  |
| 20               | 6                | 0              | -3.086410               | 3.702691  | -0.727294 |
| 21               | 1                | 0              | -3.688413               | 4.285447  | -1.427485 |
| 22               | 1                | 0              | -3.348258               | 4.025944  | 0.294553  |
| 23               | 6                | 0              | 2.444117                | -0.634277 | 0.869462  |
| 24               | 6                | 0              | 2.760084                | -1.285048 | -0.371283 |
| 25               | 6                | 0              | 2.098563                | -1.385698 | 1.989183  |
| 26               | 6                | 0              | 3.119784                | -0.561582 | -1.545264 |
| 27               | 6                | 0              | 2.723483                | -2.716987 | -0.445719 |
| 28               | 6                | 0              | 2.068065                | -2.805436 | 1.889635  |
| 29               | 6                | 0              | 3.422697                | -1.215473 | -2.721748 |
| 30               | 1                | 0              | 3.159349                | 0.521707  | -1.506611 |
| 31               | 6                | 0              | 3.042790                | -3.361982 | -1.673092 |
| 32               | 6                | 0              | 2.370186                | -3.454139 | 0.715601  |
| 33               | 6                | 0              | 3.384911                | -2.630691 | -2.790171 |



|    |   |   |           |           |           |
|----|---|---|-----------|-----------|-----------|
| 34 | 1 | 0 | 3.693979  | -0.641559 | -3.603273 |
| 35 | 1 | 0 | 3.012592  | -4.448000 | -1.713074 |
| 36 | 1 | 0 | 3.627518  | -3.134079 | -3.721512 |
| 37 | 6 | 0 | -2.498056 | -0.124575 | -0.786734 |
| 38 | 6 | 0 | -3.045988 | -0.865766 | 0.313498  |
| 39 | 6 | 0 | -2.144300 | -0.774822 | -1.967047 |
| 40 | 6 | 0 | -3.405010 | -0.253210 | 1.550266  |
| 41 | 6 | 0 | -3.237677 | -2.282371 | 0.182761  |
| 42 | 6 | 0 | -2.344575 | -2.178684 | -2.071777 |
| 43 | 6 | 0 | -3.927593 | -0.994403 | 2.589497  |
| 44 | 1 | 0 | -3.263321 | 0.815490  | 1.669339  |
| 45 | 6 | 0 | -3.783388 | -3.017959 | 1.272166  |
| 46 | 6 | 0 | -2.874374 | -2.912740 | -1.035659 |
| 47 | 6 | 0 | -4.122973 | -2.391912 | 2.451725  |
| 48 | 1 | 0 | -4.191752 | -0.504207 | 3.522263  |
| 49 | 1 | 0 | -3.926377 | -4.089347 | 1.155658  |
| 50 | 1 | 0 | -4.538007 | -2.964183 | 3.276264  |
| 51 | 1 | 0 | -3.017841 | -3.985292 | -1.138803 |
| 52 | 1 | 0 | -2.068818 | -2.675708 | -2.998047 |
| 53 | 1 | 0 | 2.337020  | -4.539346 | 0.662446  |
| 54 | 1 | 0 | 1.792877  | -3.382542 | 2.768567  |
| 55 | 6 | 0 | -1.562599 | -0.023741 | -3.143789 |
| 56 | 1 | 0 | -1.328745 | -0.707536 | -3.963834 |
| 57 | 1 | 0 | -0.641384 | 0.501483  | -2.869329 |
| 58 | 1 | 0 | -2.260053 | 0.732718  | -3.519963 |
| 59 | 6 | 0 | 1.763205  | -0.743179 | 3.317843  |
| 60 | 1 | 0 | 1.199608  | -1.435641 | 3.949413  |
| 61 | 1 | 0 | 1.169492  | 0.166703  | 3.194526  |
| 62 | 1 | 0 | 2.672079  | -0.462892 | 3.864242  |

-----  
1b-syn-GS1

Method: opt freq b3lyp/6-31+g(d,p) scrf(solvent=Chloroform)  
SCF Done: E(RB3LYP) = -1461.81811921 A.U. after 1 cycles  
Lowest frequency = 14.0986

Zero-point correction= 0.499764  
(Hartree/Particle)  
Thermal correction to Energy= 0.528809  
Thermal correction to Enthalpy= 0.529753  
Thermal correction to Gibbs Free Energy= 0.437825  
Sum of electronic and zero-point Energies= -1461.318355  
Sum of electronic and thermal Energies= -1461.289310  
Sum of electronic and thermal Enthalpies= -1461.288366  
Sum of electronic and thermal Free Energies= -1461.380294

Standard orientation:

| Center<br>Number | Atomic<br>Number | Atomic<br>Type | Coordinates (Angstroms) |          |           |
|------------------|------------------|----------------|-------------------------|----------|-----------|
|                  |                  |                | X                       | Y        | Z         |
| 1                | 6                | 0              | 1.514444                | 3.062890 | -0.287893 |
| 2                | 6                | 0              | 1.358042                | 1.730093 | 0.158163  |
| 3                | 6                | 0              | 2.560104                | 1.001680 | 0.606786  |
| 4                | 6                | 0              | 3.681198                | 1.710292 | 0.837331  |
| 5                | 6                | 0              | 0.444545                | 3.779181 | -0.822369 |
| 6                | 6                | 0              | 0.077465                | 1.165449 | 0.095222  |
| 7                | 6                | 0              | -1.025994               | 1.865486 | -0.409856 |
| 8                | 6                | 0              | -0.810783               | 3.176878 | -0.892984 |
| 9                | 6                | 0              | -3.332265               | 2.004110 | -1.130420 |

|    |   |   |           |           |           |
|----|---|---|-----------|-----------|-----------|
| 10 | 6 | 0 | -2.404886 | 1.341281  | -0.414010 |
| 11 | 1 | 0 | 0.586972  | 4.793334  | -1.178992 |
| 12 | 1 | 0 | 4.601932  | 1.227596  | 1.152670  |
| 13 | 1 | 0 | -0.063841 | 0.149158  | 0.448913  |
| 14 | 1 | 0 | -4.366903 | 1.674234  | -1.161946 |
| 15 | 8 | 0 | -1.847331 | 3.934344  | -1.363526 |
| 16 | 8 | 0 | 2.742072  | 3.665062  | -0.295826 |
| 17 | 6 | 0 | -2.947744 | 3.203947  | -1.947850 |
| 18 | 1 | 0 | -3.763797 | 3.925963  | -2.017408 |
| 19 | 1 | 0 | -2.662970 | 2.913827  | -2.973364 |
| 20 | 6 | 0 | 3.677872  | 3.206192  | 0.703906  |
| 21 | 1 | 0 | 4.648854  | 3.586871  | 0.380826  |
| 22 | 1 | 0 | 3.424632  | 3.691752  | 1.661561  |
| 23 | 6 | 0 | -2.749838 | 0.126054  | 0.392374  |
| 24 | 6 | 0 | -2.771367 | -1.162500 | -0.239271 |
| 25 | 6 | 0 | -3.050335 | 0.251192  | 1.747062  |
| 26 | 6 | 0 | -2.452156 | -1.348367 | -1.616488 |
| 27 | 6 | 0 | -3.117626 | -2.320698 | 0.534840  |
| 28 | 6 | 0 | -3.389264 | -0.911331 | 2.492417  |
| 29 | 6 | 0 | -2.481842 | -2.600609 | -2.193472 |
| 30 | 1 | 0 | -2.180849 | -0.485924 | -2.215562 |
| 31 | 6 | 0 | -3.143848 | -3.598374 | -0.091656 |
| 32 | 6 | 0 | -3.425220 | -2.157834 | 1.910678  |
| 33 | 6 | 0 | -2.834250 | -3.739850 | -1.426763 |
| 34 | 1 | 0 | -2.230362 | -2.716491 | -3.243814 |
| 35 | 1 | 0 | -3.412399 | -4.465288 | 0.506895  |
| 36 | 1 | 0 | -2.855973 | -4.720325 | -1.893434 |
| 37 | 6 | 0 | 2.517407  | -0.486425 | 0.776189  |
| 38 | 6 | 0 | 2.679235  | -1.333752 | -0.372368 |
| 39 | 6 | 0 | 2.320518  | -1.042228 | 2.037132  |
| 40 | 6 | 0 | 2.886421  | -0.814516 | -1.683112 |
| 41 | 6 | 0 | 2.641195  | -2.758099 | -0.209081 |
| 42 | 6 | 0 | 2.286296  | -2.459020 | 2.173263  |
| 43 | 6 | 0 | 3.042949  | -1.653932 | -2.766757 |
| 44 | 1 | 0 | 2.925711  | 0.260078  | -1.825509 |
| 45 | 6 | 0 | 2.807103  | -3.597270 | -1.345927 |
| 46 | 6 | 0 | 2.440955  | -3.292971 | 1.091271  |
| 47 | 6 | 0 | 3.003276  | -3.060828 | -2.600283 |
| 48 | 1 | 0 | 3.199359  | -1.233767 | -3.756227 |
| 49 | 1 | 0 | 2.776755  | -4.674908 | -1.205727 |
| 50 | 1 | 0 | 3.129179  | -3.711351 | -3.460871 |
| 51 | 1 | 0 | 2.406784  | -4.371897 | 1.218953  |
| 52 | 1 | 0 | 2.127669  | -2.882747 | 3.161553  |
| 53 | 1 | 0 | -3.687880 | -3.032394 | 2.500403  |
| 54 | 1 | 0 | -3.626886 | -0.802080 | 3.547370  |
| 55 | 6 | 0 | -3.042839 | 1.594838  | 2.441784  |
| 56 | 1 | 0 | -2.087236 | 2.113131  | 2.309313  |
| 57 | 1 | 0 | -3.819815 | 2.255713  | 2.041121  |
| 58 | 1 | 0 | -3.219584 | 1.478361  | 3.514303  |
| 59 | 6 | 0 | 2.150666  | -0.190660 | 3.276824  |
| 60 | 1 | 0 | 1.650538  | -0.757084 | 4.067605  |
| 61 | 1 | 0 | 3.121080  | 0.136682  | 3.669891  |
| 62 | 1 | 0 | 1.564503  | 0.710525  | 3.078204  |

-----  
1b-syn-GS2

Method: opt freq b3lyp/6-31+g(d,p) scrf(solvent=Chloroform)

SCF Done: E(RB3LYP) = -1461.81785909 A.U. after 2 cycles

Lowest frequency = 9.2212

Zero-point correction= 0.499697  
 (Hartree/Particle)  
 Thermal correction to Energy= 0.528740  
 Thermal correction to Enthalpy= 0.529685  
 Thermal correction to Gibbs Free Energy= 0.437623  
 Sum of electronic and zero-point Energies= -1461.318162  
 Sum of electronic and thermal Energies= -1461.289119  
 Sum of electronic and thermal Enthalpies= -1461.288175  
 Sum of electronic and thermal Free Energies= -1461.380236

Standard orientation:

| Center<br>Number | Atomic<br>Number | Atomic<br>Type | Coordinates (Angstroms) |           |           |
|------------------|------------------|----------------|-------------------------|-----------|-----------|
|                  |                  |                | X                       | Y         | Z         |
| 1                | 6                | 0              | 1.202799                | 3.082684  | -0.771864 |
| 2                | 6                | 0              | 1.227673                | 1.854057  | -0.072525 |
| 3                | 6                | 0              | 2.539835                | 1.240633  | 0.208385  |
| 4                | 6                | 0              | 3.641685                | 1.994912  | 0.037776  |
| 5                | 6                | 0              | 0.000042                | 3.685418  | -1.137517 |
| 6                | 6                | 0              | 0.000017                | 1.264993  | 0.256955  |
| 7                | 6                | 0              | -1.227625               | 1.854094  | -0.072505 |
| 8                | 6                | 0              | -1.202728               | 3.082721  | -0.771845 |
| 9                | 6                | 0              | -3.641636               | 1.995008  | 0.037810  |
| 10               | 6                | 0              | -2.539803               | 1.240709  | 0.208430  |
| 11               | 1                | 0              | 0.000052                | 4.622230  | -1.683616 |
| 12               | 1                | 0              | 4.635568                | 1.593495  | 0.214864  |
| 13               | 1                | 0              | 0.000005                | 0.307010  | 0.767344  |
| 14               | 1                | 0              | -4.635526               | 1.593621  | 0.214925  |
| 15               | 8                | 0              | -2.359570               | 3.687266  | -1.179102 |
| 16               | 8                | 0              | 2.359659                | 3.687187  | -1.179141 |
| 17               | 6                | 0              | -3.525164               | 3.437338  | -0.363903 |
| 18               | 1                | 0              | -3.474919               | 4.094974  | 0.520451  |
| 19               | 1                | 0              | -4.372740               | 3.758271  | -0.972871 |
| 20               | 6                | 0              | 3.525221                | 3.437256  | -0.363894 |
| 21               | 1                | 0              | 4.372820                | 3.758226  | -0.972808 |
| 22               | 1                | 0              | 3.474915                | 4.094860  | 0.520481  |
| 23               | 6                | 0              | -2.624652               | -0.186396 | 0.657714  |
| 24               | 6                | 0              | -2.614750               | -1.238930 | -0.319243 |
| 25               | 6                | 0              | -2.715364               | -0.486950 | 2.013951  |
| 26               | 6                | 0              | -2.525137               | -0.983675 | -1.718286 |
| 27               | 6                | 0              | -2.705827               | -2.603366 | 0.113617  |
| 28               | 6                | 0              | -2.801540               | -1.848930 | 2.418702  |
| 29               | 6                | 0              | -2.525062               | -2.016115 | -2.633088 |
| 30               | 1                | 0              | -2.459178               | 0.042040  | -2.064794 |
| 31               | 6                | 0              | -2.704324               | -3.645862 | -0.854614 |
| 32               | 6                | 0              | -2.798366               | -2.875786 | 1.504251  |
| 33               | 6                | 0              | -2.615770               | -3.362671 | -2.200405 |
| 34               | 1                | 0              | -2.453996               | -1.796162 | -3.694477 |
| 35               | 1                | 0              | -2.774906               | -4.674939 | -0.511142 |
| 36               | 1                | 0              | -2.615083               | -4.166683 | -2.930602 |
| 37               | 6                | 0              | 2.624671                | -0.186491 | 0.657618  |
| 38               | 6                | 0              | 2.614640                | -1.238986 | -0.319391 |
| 39               | 6                | 0              | 2.715538                | -0.487112 | 2.013824  |
| 40               | 6                | 0              | 2.524856                | -0.983668 | -1.718408 |
| 41               | 6                | 0              | 2.705769                | -2.603440 | 0.113393  |
| 42               | 6                | 0              | 2.801771                | -1.849118 | 2.418500  |
| 43               | 6                | 0              | 2.524658                | -2.016066 | -2.633260 |
| 44               | 1                | 0              | 2.458866                | 0.042064  | -2.064863 |
| 45               | 6                | 0              | 2.704137                | -3.645892 | -0.854883 |

|    |   |   |           |           |           |
|----|---|---|-----------|-----------|-----------|
| 46 | 6 | 0 | 2.798490  | -2.875927 | 1.504006  |
| 47 | 6 | 0 | 2.615411  | -3.362640 | -2.200651 |
| 48 | 1 | 0 | 2.453461  | -1.796061 | -3.694630 |
| 49 | 1 | 0 | 2.774760  | -4.674984 | -0.511466 |
| 50 | 1 | 0 | 2.614626  | -4.166620 | -2.930884 |
| 51 | 1 | 0 | 2.863099  | -3.908826 | 1.836468  |
| 52 | 1 | 0 | 2.868405  | -2.073201 | 3.480026  |
| 53 | 1 | 0 | -2.862932 | -3.908668 | 1.836772  |
| 54 | 1 | 0 | -2.868053 | -2.072966 | 3.480244  |
| 55 | 6 | 0 | -2.739333 | 0.590048  | 3.077183  |
| 56 | 1 | 0 | -2.044731 | 1.404062  | 2.852068  |
| 57 | 1 | 0 | -3.737400 | 1.035694  | 3.168817  |
| 58 | 1 | 0 | -2.474205 | 0.174164  | 4.053380  |
| 59 | 6 | 0 | 2.739670  | 0.589782  | 3.077155  |
| 60 | 1 | 0 | 2.473367  | 0.174065  | 4.053108  |
| 61 | 1 | 0 | 3.738119  | 1.034411  | 3.169650  |
| 62 | 1 | 0 | 2.046062  | 1.404496  | 2.851559  |

1b-syn-GS3

Method: opt freq b3lyp/6-31+g(d,p) scrf(solvent=Chloroform)  
 SCF Done: E(RB3LYP) = -1461.81801029 A.U. after 1 cycles  
 Lowest frequency = 14.0369

Zero-point correction= 0.499690  
 (Hartree/Particle)  
 Thermal correction to Energy= 0.528762  
 Thermal correction to Enthalpy= 0.529707  
 Thermal correction to Gibbs Free Energy= 0.437517  
 Sum of electronic and zero-point Energies= -1461.318320  
 Sum of electronic and thermal Energies= -1461.289248  
 Sum of electronic and thermal Enthalpies= -1461.288304  
 Sum of electronic and thermal Free Energies= -1461.380494

Standard orientation:

| Center<br>Number | Atomic<br>Number | Atomic<br>Type | Coordinates (Angstroms) |          |           |
|------------------|------------------|----------------|-------------------------|----------|-----------|
|                  |                  |                | X                       | Y        | Z         |
| 1                | 6                | 0              | 1.203140                | 3.240139 | -0.500628 |
| 2                | 6                | 0              | 1.227814                | 1.850967 | -0.237869 |
| 3                | 6                | 0              | 2.539455                | 1.203700 | -0.045346 |
| 4                | 6                | 0              | 3.642461                | 1.888230 | -0.402179 |
| 5                | 6                | 0              | 0.000403                | 3.936195 | -0.612967 |
| 6                | 6                | 0              | 0.000133                | 1.187872 | -0.110345 |
| 7                | 6                | 0              | -1.227419               | 1.851202 | -0.237898 |
| 8                | 6                | 0              | -1.202471               | 3.240368 | -0.500665 |
| 9                | 6                | 0              | -3.642052               | 1.888925 | -0.402285 |
| 10               | 6                | 0              | -2.539190               | 1.204193 | -0.045393 |
| 11               | 1                | 0              | 0.000507                | 5.003802 | -0.802961 |
| 12               | 1                | 0              | 4.636150                | 1.468079 | -0.274082 |
| 13               | 1                | 0              | 0.000030                | 0.126279 | 0.115227  |
| 14               | 1                | 0              | -4.635828               | 1.468978 | -0.274193 |
| 15               | 8                | 0              | -2.359103               | 3.964830 | -0.580572 |
| 16               | 8                | 0              | 2.359910                | 3.964385 | -0.580493 |
| 17               | 6                | 0              | -3.525766               | 3.245600 | -1.035783 |
| 18               | 1                | 0              | -4.372650               | 3.886055 | -0.781173 |
| 19               | 1                | 0              | -3.476776               | 3.169805 | -2.135266 |
| 20               | 6                | 0              | 3.526471                | 3.244949 | -1.035636 |

|    |   |   |           |           |           |
|----|---|---|-----------|-----------|-----------|
| 21 | 1 | 0 | 3.477556  | 3.169202  | -2.135126 |
| 22 | 1 | 0 | 4.373457  | 3.885236  | -0.780939 |
| 23 | 6 | 0 | -2.622322 | -0.164484 | 0.559661  |
| 24 | 6 | 0 | -2.698349 | -1.313883 | -0.296523 |
| 25 | 6 | 0 | -2.629028 | -0.316505 | 1.944320  |
| 26 | 6 | 0 | -2.676991 | -1.214889 | -1.718788 |
| 27 | 6 | 0 | -2.792865 | -2.621870 | 0.286850  |
| 28 | 6 | 0 | -2.723001 | -1.622985 | 2.497969  |
| 29 | 6 | 0 | -2.751596 | -2.339281 | -2.513976 |
| 30 | 1 | 0 | -2.601146 | -0.235029 | -2.177650 |
| 31 | 6 | 0 | -2.872089 | -3.761890 | -0.561392 |
| 32 | 6 | 0 | -2.804246 | -2.741583 | 1.700973  |
| 33 | 6 | 0 | -2.853001 | -3.628287 | -1.932595 |
| 34 | 1 | 0 | -2.730842 | -2.237660 | -3.595306 |
| 35 | 1 | 0 | -2.946347 | -4.745463 | -0.104349 |
| 36 | 1 | 0 | -2.912650 | -4.505945 | -2.569567 |
| 37 | 6 | 0 | 2.622303  | -0.165021 | 0.559646  |
| 38 | 6 | 0 | 2.698051  | -1.314397 | -0.296595 |
| 39 | 6 | 0 | 2.629017  | -0.317110 | 1.944297  |
| 40 | 6 | 0 | 2.676673  | -1.215330 | -1.718853 |
| 41 | 6 | 0 | 2.792302  | -2.622432 | 0.286712  |
| 42 | 6 | 0 | 2.722718  | -1.623637 | 2.497882  |
| 43 | 6 | 0 | 2.751013  | -2.339699 | -2.514098 |
| 44 | 1 | 0 | 2.601027  | -0.235431 | -2.177667 |
| 45 | 6 | 0 | 2.871254  | -3.762428 | -0.561586 |
| 46 | 6 | 0 | 2.803697  | -2.742215 | 1.700830  |
| 47 | 6 | 0 | 2.852157  | -3.628755 | -1.932782 |
| 48 | 1 | 0 | 2.730251  | -2.238022 | -3.595423 |
| 49 | 1 | 0 | 2.945314  | -4.746039 | -0.104592 |
| 50 | 1 | 0 | 2.911600  | -4.506396 | -2.569798 |
| 51 | 1 | 0 | 2.874197  | -3.731117 | 2.146646  |
| 52 | 1 | 0 | 2.731020  | -1.731224 | 3.579358  |
| 53 | 1 | 0 | -2.874951 | -3.730448 | 2.146838  |
| 54 | 1 | 0 | -2.731300 | -1.730519 | 3.579450  |
| 55 | 6 | 0 | -2.559140 | 0.873849  | 2.875105  |
| 56 | 1 | 0 | -1.718562 | 1.531087  | 2.629963  |
| 57 | 1 | 0 | -3.467790 | 1.483528  | 2.811089  |
| 58 | 1 | 0 | -2.445011 | 0.549251  | 3.912801  |
| 59 | 6 | 0 | 2.559430  | 0.873214  | 2.875143  |
| 60 | 1 | 0 | 2.445022  | 0.548593  | 3.912803  |
| 61 | 1 | 0 | 3.468325  | 1.482549  | 2.811309  |
| 62 | 1 | 0 | 1.719141  | 1.530787  | 2.629913  |

1b-TS2-ext

Method: opt(ts,calcfc,noeigen) b3lyp/6-31+g(d,p) freq scrf(solvent=Chloroform)  
 SCF Done: E(RB3LYP) = -1461.76777077 A.U. after 1 cycles  
 Lowest frequency = -20.6403

|                                              |              |
|----------------------------------------------|--------------|
| Zero-point correction=                       | 0.500613     |
| (Hartree/Particle)                           |              |
| Thermal correction to Energy=                | 0.528008     |
| Thermal correction to Enthalpy=              | 0.528952     |
| Thermal correction to Gibbs Free Energy=     | 0.443397     |
| Sum of electronic and zero-point Energies=   | -1461.267158 |
| Sum of electronic and thermal Energies=      | -1461.239763 |
| Sum of electronic and thermal Enthalpies=    | -1461.238819 |
| Sum of electronic and thermal Free Energies= | -1461.324373 |

Standard orientation:

| Center<br>Number | Atomic<br>Number | Atomic<br>Type | Coordinates (Angstroms) |           |           |
|------------------|------------------|----------------|-------------------------|-----------|-----------|
|                  |                  |                | X                       | Y         | Z         |
| 1                | 6                | 0              | -1.607940               | 2.922058  | -0.502825 |
| 2                | 6                | 0              | -1.458028               | 1.579572  | -0.075487 |
| 3                | 6                | 0              | -2.738761               | 0.832302  | 0.207821  |
| 4                | 6                | 0              | -3.687221               | 1.634722  | 0.758670  |
| 5                | 6                | 0              | -0.523987               | 3.721886  | -0.860257 |
| 6                | 6                | 0              | -0.141341               | 1.184521  | 0.224046  |
| 7                | 6                | 0              | 0.978817                | 1.987736  | -0.045234 |
| 8                | 6                | 0              | 0.764715                | 3.247135  | -0.648024 |
| 9                | 6                | 0              | 3.334419                | 2.534543  | 0.132735  |
| 10               | 6                | 0              | 2.372960                | 1.599400  | 0.254685  |
| 11               | 1                | 0              | -0.687756               | 4.730666  | -1.222295 |
| 12               | 1                | 0              | -4.608651               | 1.234620  | 1.158704  |
| 13               | 1                | 0              | 0.034812                | 0.232981  | 0.707546  |
| 14               | 1                | 0              | 4.373706                | 2.299268  | 0.345718  |
| 15               | 8                | 0              | 1.808550                | 4.039963  | -1.043577 |
| 16               | 8                | 0              | -2.851914               | 3.503020  | -0.498001 |
| 17               | 6                | 0              | 3.008417                | 3.948252  | -0.249507 |
| 18               | 1                | 0              | 3.794808                | 4.390744  | -0.865261 |
| 19               | 1                | 0              | 2.885202                | 4.582292  | 0.645254  |
| 20               | 6                | 0              | -3.553849               | 3.123838  | 0.708646  |
| 21               | 1                | 0              | -3.019341               | 3.548506  | 1.574270  |
| 22               | 1                | 0              | -4.534872               | 3.599647  | 0.644108  |
| 23               | 6                | 0              | 2.726847                | 0.211350  | 0.698359  |
| 24               | 6                | 0              | 3.146813                | -0.759522 | -0.272372 |
| 25               | 6                | 0              | 2.703530                | -0.113702 | 2.052197  |
| 26               | 6                | 0              | 3.170235                | -0.484647 | -1.670940 |
| 27               | 6                | 0              | 3.563824                | -2.060376 | 0.166602  |
| 28               | 6                | 0              | 3.106607                | -1.415779 | 2.460980  |
| 29               | 6                | 0              | 3.583809                | -1.437462 | -2.579028 |
| 30               | 1                | 0              | 2.857539                | 0.492933  | -2.021612 |
| 31               | 6                | 0              | 3.993517                | -3.018216 | -0.794113 |
| 32               | 6                | 0              | 3.530656                | -2.358535 | 1.554247  |
| 33               | 6                | 0              | 4.004264                | -2.717859 | -2.139308 |
| 34               | 1                | 0              | 3.588248                | -1.205114 | -3.640090 |
| 35               | 1                | 0              | 4.311700                | -3.997612 | -0.445545 |
| 36               | 1                | 0              | 4.332017                | -3.457975 | -2.863403 |
| 37               | 6                | 0              | -3.135874               | -0.598128 | -0.053076 |
| 38               | 6                | 0              | -2.233737               | -1.744186 | -0.093428 |
| 39               | 6                | 0              | -4.511301               | -0.890401 | -0.204026 |
| 40               | 6                | 0              | -0.886199               | -1.682291 | -0.542999 |
| 41               | 6                | 0              | -2.739788               | -3.058457 | 0.200494  |
| 42               | 6                | 0              | -4.983028               | -2.212717 | 0.034333  |
| 43               | 6                | 0              | -0.063919               | -2.793111 | -0.561804 |
| 44               | 1                | 0              | -0.509899               | -0.761043 | -0.958398 |
| 45               | 6                | 0              | -1.858989               | -4.173655 | 0.240751  |
| 46               | 6                | 0              | -4.139221               | -3.249489 | 0.334366  |
| 47               | 6                | 0              | -0.534244               | -4.047625 | -0.115606 |
| 48               | 1                | 0              | 0.948257                | -2.698693 | -0.940686 |
| 49               | 1                | 0              | -2.269811               | -5.143546 | 0.509736  |
| 50               | 1                | 0              | 0.126822                | -4.909145 | -0.105082 |
| 51               | 1                | 0              | -4.525373               | -4.237058 | 0.571752  |
| 52               | 1                | 0              | -6.055150               | -2.386441 | -0.014309 |
| 53               | 1                | 0              | 3.840543                | -3.344747 | 1.890335  |
| 54               | 1                | 0              | 3.081939                | -1.659370 | 3.519893  |
| 55               | 6                | 0              | -5.587505               | 0.065813  | -0.699342 |
| 56               | 1                | 0              | -6.187908               | -0.460868 | -1.450227 |

|    |   |   |           |          |           |
|----|---|---|-----------|----------|-----------|
| 57 | 1 | 0 | -6.282109 | 0.383149 | 0.087535  |
| 58 | 1 | 0 | -5.173864 | 0.962498 | -1.161736 |
| 59 | 6 | 0 | 2.299609  | 0.889503 | 3.110759  |
| 60 | 1 | 0 | 2.071886  | 0.385683 | 4.054192  |
| 61 | 1 | 0 | 3.107840  | 1.605581 | 3.303835  |
| 62 | 1 | 0 | 1.421679  | 1.470343 | 2.814489  |

1b-TS1-int

Method: opt(ts,calcfc,noeigen) b3lyp/6-31+g(d,p) freq scrf(solvent=Chloroform)  
 SCF Done: E(RB3LYP) = -1461.75506826 A.U. after 1 cycles  
 Lowest frequency = -49.4085

Zero-point correction= 0.500591  
 (Hartree/Particle)  
 Thermal correction to Energy= 0.528142  
 Thermal correction to Enthalpy= 0.529086  
 Thermal correction to Gibbs Free Energy= 0.442738  
 Sum of electronic and zero-point Energies= -1461.254477  
 Sum of electronic and thermal Energies= -1461.226927  
 Sum of electronic and thermal Enthalpies= -1461.225982  
 Sum of electronic and thermal Free Energies= -1461.312330

Standard orientation:

| Center<br>Number | Atomic<br>Number | Atomic<br>Type | Coordinates (Angstroms) |           |           |
|------------------|------------------|----------------|-------------------------|-----------|-----------|
|                  |                  |                | X                       | Y         | Z         |
| 1                | 6                | 0              | -0.930627               | 2.806988  | -0.534523 |
| 2                | 6                | 0              | -0.843295               | 1.584193  | 0.190611  |
| 3                | 6                | 0              | -2.158442               | 1.010901  | 0.694364  |
| 4                | 6                | 0              | -3.053976               | 1.989583  | 0.999449  |
| 5                | 6                | 0              | 0.151512                | 3.360149  | -1.219709 |
| 6                | 6                | 0              | 0.465652                | 1.102587  | 0.364465  |
| 7                | 6                | 0              | 1.595553                | 1.670246  | -0.243710 |
| 8                | 6                | 0              | 1.409033                | 2.788669  | -1.082983 |
| 9                | 6                | 0              | 3.988980                | 1.895922  | -0.551389 |
| 10               | 6                | 0              | 2.969471                | 1.151759  | -0.082494 |
| 11               | 1                | 0              | 0.018777                | 4.275434  | -1.785437 |
| 12               | 1                | 0              | -4.079734               | 1.790301  | 1.246595  |
| 13               | 1                | 0              | 0.645112                | 0.266991  | 1.015846  |
| 14               | 1                | 0              | 5.017900                | 1.557464  | -0.465258 |
| 15               | 8                | 0              | 2.445185                | 3.338082  | -1.786688 |
| 16               | 8                | 0              | -2.086745               | 3.535893  | -0.540279 |
| 17               | 6                | 0              | 3.747250                | 3.241326  | -1.171798 |
| 18               | 1                | 0              | 4.458826                | 3.449287  | -1.973877 |
| 19               | 1                | 0              | 3.838373                | 4.046623  | -0.423151 |
| 20               | 6                | 0              | -2.730372               | 3.427333  | 0.749824  |
| 21               | 1                | 0              | -2.061018               | 3.868757  | 1.504816  |
| 22               | 1                | 0              | -3.635279               | 4.032661  | 0.684305  |
| 23               | 6                | 0              | 3.224211                | -0.170237 | 0.576879  |
| 24               | 6                | 0              | 3.250673                | -1.365434 | -0.218988 |
| 25               | 6                | 0              | 3.458269                | -0.233696 | 1.947907  |
| 26               | 6                | 0              | 3.010416                | -1.355209 | -1.623994 |
| 27               | 6                | 0              | 3.526915                | -2.625201 | 0.409546  |
| 28               | 6                | 0              | 3.725534                | -1.496023 | 2.549073  |
| 29               | 6                | 0              | 3.042841                | -2.520611 | -2.361713 |
| 30               | 1                | 0              | 2.801331                | -0.411870 | -2.116697 |
| 31               | 6                | 0              | 3.557986                | -3.808652 | -0.379776 |

|    |   |   |           |           |           |
|----|---|---|-----------|-----------|-----------|
| 32 | 6 | 0 | 3.762624  | -2.654924 | 1.809627  |
| 33 | 6 | 0 | 3.321110  | -3.762060 | -1.736774 |
| 34 | 1 | 0 | 2.854630  | -2.487149 | -3.430986 |
| 35 | 1 | 0 | 3.773073  | -4.755035 | 0.110074  |
| 36 | 1 | 0 | 3.347710  | -4.671990 | -2.329127 |
| 37 | 6 | 0 | -2.610797 | -0.422681 | 0.442410  |
| 38 | 6 | 0 | -4.042223 | -0.727170 | 0.283540  |
| 39 | 6 | 0 | -1.753770 | -1.494250 | 0.130632  |
| 40 | 6 | 0 | -5.082278 | -0.175020 | 1.086951  |
| 41 | 6 | 0 | -4.456311 | -1.736215 | -0.651313 |
| 42 | 6 | 0 | -2.198414 | -2.528395 | -0.748349 |
| 43 | 6 | 0 | -6.419798 | -0.455017 | 0.864475  |
| 44 | 1 | 0 | -4.835301 | 0.401806  | 1.967037  |
| 45 | 6 | 0 | -5.835531 | -1.960609 | -0.907817 |
| 46 | 6 | 0 | -3.475522 | -2.584592 | -1.232889 |
| 47 | 6 | 0 | -6.813510 | -1.311472 | -0.184547 |
| 48 | 1 | 0 | -7.168021 | -0.030113 | 1.527620  |
| 49 | 1 | 0 | -6.103423 | -2.699490 | -1.658767 |
| 50 | 1 | 0 | -7.865063 | -1.502926 | -0.375487 |
| 51 | 1 | 0 | -3.771423 | -3.330380 | -1.965227 |
| 52 | 1 | 0 | -1.469009 | -3.276011 | -1.049964 |
| 53 | 1 | 0 | 3.969937  | -3.607664 | 2.290244  |
| 54 | 1 | 0 | 3.905185  | -1.534552 | 3.620366  |
| 55 | 6 | 0 | -0.395351 | -1.766375 | 0.739339  |
| 56 | 1 | 0 | -0.363921 | -2.831771 | 0.993865  |
| 57 | 1 | 0 | 0.440578  | -1.584074 | 0.059889  |
| 58 | 1 | 0 | -0.239688 | -1.220341 | 1.669481  |
| 59 | 6 | 0 | 3.464303  | 1.003732  | 2.819200  |
| 60 | 1 | 0 | 3.338781  | 0.736083  | 3.872132  |
| 61 | 1 | 0 | 4.413064  | 1.546545  | 2.727317  |
| 62 | 1 | 0 | 2.668369  | 1.702335  | 2.546974  |

## Compound 2b:

2b-anti-GS1

Method: opt freq b3lyp/6-31+g(d,p) scrf(solvent=Chloroform)

SCF Done: E(RB3LYP) = -1461.81237347 A.U. after 2 cycles

Lowest frequency = 13.1670

Zero-point correction= 0.499907  
(Hartree/Particle)  
Thermal correction to Energy= 0.528815  
Thermal correction to Enthalpy= 0.529760  
Thermal correction to Gibbs Free Energy= 0.438488  
Sum of electronic and zero-point Energies= -1461.312466  
Sum of electronic and thermal Energies= -1461.283558  
Sum of electronic and thermal Enthalpies= -1461.282614  
Sum of electronic and thermal Free Energies= -1461.373886

Standard orientation:

| Center<br>Number | Atomic<br>Number | Atomic<br>Type | Coordinates (Angstroms) |          |           |
|------------------|------------------|----------------|-------------------------|----------|-----------|
|                  |                  |                | X                       | Y        | Z         |
| 1                | 6                | 0              | -0.837277               | 2.942034 | 0.106261  |
| 2                | 6                | 0              | 0.547728                | 2.777028 | 0.087890  |
| 3                | 6                | 0              | 1.150121                | 1.494826 | 0.034066  |
| 4                | 6                | 0              | 0.286209                | 0.388910 | -0.089124 |



|    |   |   |           |           |           |
|----|---|---|-----------|-----------|-----------|
| 5  | 6 | 0 | -1.120359 | 0.532935  | -0.120907 |
| 6  | 6 | 0 | -1.657943 | 1.822062  | 0.000144  |
| 7  | 8 | 0 | 0.848952  | -0.842343 | -0.266266 |
| 8  | 6 | 0 | 0.082673  | -1.969446 | 0.204472  |
| 9  | 6 | 0 | -1.357226 | -1.877105 | -0.208277 |
| 10 | 6 | 0 | -1.942494 | -0.672713 | -0.343006 |
| 11 | 8 | 0 | 1.316851  | 3.902028  | 0.201523  |
| 12 | 6 | 0 | 2.614624  | 3.815000  | -0.423151 |
| 13 | 6 | 0 | 3.320933  | 2.556880  | -0.014694 |
| 14 | 6 | 0 | 2.621046  | 1.423065  | 0.188765  |
| 15 | 1 | 0 | -1.250815 | 3.942018  | 0.178807  |
| 16 | 1 | 0 | -2.735536 | 1.949452  | -0.021292 |
| 17 | 1 | 0 | 0.574627  | -2.844736 | -0.224081 |
| 18 | 1 | 0 | 0.184735  | -2.026975 | 1.301398  |
| 19 | 1 | 0 | -1.909486 | -2.799162 | -0.366662 |
| 20 | 1 | 0 | 2.478069  | 3.872737  | -1.515977 |
| 21 | 1 | 0 | 3.152004  | 4.707700  | -0.098937 |
| 22 | 1 | 0 | 4.397528  | 2.584981  | 0.126540  |
| 23 | 6 | 0 | -3.382788 | -0.533305 | -0.733549 |
| 24 | 6 | 0 | -4.403003 | -0.621643 | 0.272203  |
| 25 | 6 | 0 | -3.725831 | -0.316876 | -2.066671 |
| 26 | 6 | 0 | -4.106023 | -0.820062 | 1.652862  |
| 27 | 6 | 0 | -5.781412 | -0.496704 | -0.109174 |
| 28 | 6 | 0 | -5.098200 | -0.197196 | -2.418985 |
| 29 | 6 | 0 | -5.109833 | -0.897417 | 2.595567  |
| 30 | 1 | 0 | -3.070095 | -0.912017 | 1.960513  |
| 31 | 6 | 0 | -6.793840 | -0.585872 | 0.887301  |
| 32 | 6 | 0 | -6.096977 | -0.284837 | -1.476471 |
| 33 | 1 | 0 | -5.355256 | -0.034757 | -3.462391 |
| 34 | 6 | 0 | -6.469906 | -0.782581 | 2.211993  |
| 35 | 1 | 0 | -4.857289 | -1.047083 | 3.641437  |
| 36 | 1 | 0 | -7.833121 | -0.493924 | 0.581828  |
| 37 | 1 | 0 | -7.139459 | -0.190982 | -1.769728 |
| 38 | 1 | 0 | -7.251376 | -0.847976 | 2.963370  |
| 39 | 6 | 0 | 3.325804  | 0.189404  | 0.671303  |
| 40 | 6 | 0 | 4.119445  | -0.584445 | -0.240767 |
| 41 | 6 | 0 | 3.249254  | -0.169914 | 2.014793  |
| 42 | 6 | 0 | 4.217764  | -0.276696 | -1.629273 |
| 43 | 6 | 0 | 4.834184  | -1.730668 | 0.244500  |
| 44 | 6 | 0 | 3.963938  | -1.312236 | 2.469680  |
| 45 | 6 | 0 | 4.986952  | -1.042681 | -2.480519 |
| 46 | 1 | 0 | 3.672171  | 0.574987  | -2.019538 |
| 47 | 6 | 0 | 5.624475  | -2.497224 | -0.657489 |
| 48 | 6 | 0 | 4.733247  | -2.071388 | 1.618853  |
| 49 | 1 | 0 | 3.902293  | -1.578644 | 3.521830  |
| 50 | 6 | 0 | 5.704147  | -2.163422 | -1.992030 |
| 51 | 1 | 0 | 5.041222  | -0.787318 | -3.535051 |
| 52 | 1 | 0 | 6.165484  | -3.357713 | -0.271523 |
| 53 | 1 | 0 | 5.276139  | -2.936654 | 1.990761  |
| 54 | 1 | 0 | 6.309631  | -2.757168 | -2.670703 |
| 55 | 6 | 0 | 2.426022  | 0.617536  | 3.010081  |
| 56 | 1 | 0 | 2.578339  | 1.695468  | 2.898940  |
| 57 | 1 | 0 | 1.352878  | 0.432670  | 2.879143  |
| 58 | 1 | 0 | 2.686637  | 0.339147  | 4.034911  |
| 59 | 6 | 0 | -2.675777 | -0.218608 | -3.150849 |
| 60 | 1 | 0 | -1.958101 | 0.583051  | -2.944996 |
| 61 | 1 | 0 | -2.098849 | -1.146234 | -3.233930 |
| 62 | 1 | 0 | -3.136874 | -0.018166 | -4.121511 |

2b-anti-GS2

Method: opt freq b3lyp/6-31+g(d,p) scrf(solvent=Chloroform)

SCF Done: E(RB3LYP) = -1461.81168165 A.U. after 1 cycles

Lowest frequency = 10.3619

Zero-point correction= 0.499740  
(Hartree/Particle)  
Thermal correction to Energy= 0.528766  
Thermal correction to Enthalpy= 0.529710  
Thermal correction to Gibbs Free Energy= 0.437425  
Sum of electronic and zero-point Energies= -1461.311941  
Sum of electronic and thermal Energies= -1461.282915  
Sum of electronic and thermal Enthalpies= -1461.281971  
Sum of electronic and thermal Free Energies= -1461.374257

Standard orientation:

| Center<br>Number | Atomic<br>Number | Atomic<br>Type | Coordinates (Angstroms) |           |           |
|------------------|------------------|----------------|-------------------------|-----------|-----------|
|                  |                  |                | X                       | Y         | Z         |
| 1                | 6                | 0              | 0.638866                | -1.973951 | -2.102445 |
| 2                | 6                | 0              | -0.700507               | -2.090960 | -1.731758 |
| 3                | 6                | 0              | -1.237256               | -1.397725 | -0.617674 |
| 4                | 6                | 0              | -0.331688               | -0.648586 | 0.162492  |
| 5                | 6                | 0              | 1.030563                | -0.510871 | -0.196017 |
| 6                | 6                | 0              | 1.489314                | -1.178748 | -1.339559 |
| 7                | 8                | 0              | -0.821014               | 0.019820  | 1.247136  |
| 8                | 6                | 0              | 0.107842                | 0.267636  | 2.321593  |
| 9                | 6                | 0              | 1.427164                | 0.774943  | 1.819458  |
| 10               | 6                | 0              | 1.882278                | 0.379577  | 0.616749  |
| 11               | 8                | 0              | -1.505145               | -2.856608 | -2.530907 |
| 12               | 6                | 0              | -2.626842               | -3.470557 | -1.865062 |
| 13               | 6                | 0              | -3.366195               | -2.471508 | -1.027262 |
| 14               | 6                | 0              | -2.701278               | -1.480977 | -0.400579 |
| 15               | 1                | 0              | 0.995452                | -2.510773 | -2.974734 |
| 16               | 1                | 0              | 2.530381                | -1.077479 | -1.628779 |
| 17               | 1                | 0              | 0.229625                | -0.666119 | 2.896970  |
| 18               | 1                | 0              | -0.391406               | 0.995598  | 2.964071  |
| 19               | 1                | 0              | 2.004414                | 1.437469  | 2.458147  |
| 20               | 1                | 0              | -2.254040               | -4.314684 | -1.260731 |
| 21               | 1                | 0              | -3.251425               | -3.874098 | -2.663932 |
| 22               | 1                | 0              | -4.445354               | -2.561713 | -0.942771 |
| 23               | 6                | 0              | 3.204421                | 0.840249  | 0.081732  |
| 24               | 6                | 0              | 4.402143                | 0.142915  | 0.454942  |
| 25               | 6                | 0              | 3.266875                | 1.938385  | -0.773623 |
| 26               | 6                | 0              | 4.391953                | -0.998231 | 1.310154  |
| 27               | 6                | 0              | 5.667282                | 0.593532  | -0.052260 |
| 28               | 6                | 0              | 4.532209                | 2.365324  | -1.262325 |
| 29               | 6                | 0              | 5.560708                | -1.647923 | 1.648253  |
| 30               | 1                | 0              | 3.444939                | -1.355489 | 1.699871  |
| 31               | 6                | 0              | 6.855639                | -0.096203 | 0.319139  |
| 32               | 6                | 0              | 5.696825                | 1.719617  | -0.915508 |
| 33               | 1                | 0              | 4.570658                | 3.226336  | -1.924449 |
| 34               | 6                | 0              | 6.808371                | -1.193235 | 1.151516  |
| 35               | 1                | 0              | 5.526071                | -2.516113 | 2.300257  |
| 36               | 1                | 0              | 7.806305                | 0.260126  | -0.069625 |
| 37               | 1                | 0              | 6.652712                | 2.064732  | -1.301258 |
| 38               | 1                | 0              | 7.721986                | -1.711771 | 1.427160  |
| 39               | 6                | 0              | -3.466603               | -0.473089 | 0.405161  |

|    |   |   |           |           |           |
|----|---|---|-----------|-----------|-----------|
| 40 | 6 | 0 | -3.718076 | 0.826477  | -0.149626 |
| 41 | 6 | 0 | -3.966295 | -0.809509 | 1.659379  |
| 42 | 6 | 0 | -3.252312 | 1.212770  | -1.440098 |
| 43 | 6 | 0 | -4.475103 | 1.782517  | 0.606059  |
| 44 | 6 | 0 | -4.717965 | 0.154033  | 2.387518  |
| 45 | 6 | 0 | -3.508993 | 2.470216  | -1.946618 |
| 46 | 1 | 0 | -2.690050 | 0.501826  | -2.035521 |
| 47 | 6 | 0 | -4.723671 | 3.071154  | 0.056209  |
| 48 | 6 | 0 | -4.965079 | 1.410609  | 1.885678  |
| 49 | 1 | 0 | -5.096885 | -0.116474 | 3.369899  |
| 50 | 6 | 0 | -4.250762 | 3.413285  | -1.192336 |
| 51 | 1 | 0 | -3.142314 | 2.739270  | -2.933173 |
| 52 | 1 | 0 | -5.299504 | 3.783709  | 0.641653  |
| 53 | 1 | 0 | -5.537797 | 2.131929  | 2.463134  |
| 54 | 1 | 0 | -4.447656 | 4.399794  | -1.601929 |
| 55 | 6 | 0 | -3.717656 | -2.162190 | 2.291497  |
| 56 | 1 | 0 | -2.690851 | -2.502423 | 2.128985  |
| 57 | 1 | 0 | -4.379340 | -2.931628 | 1.876186  |
| 58 | 1 | 0 | -3.898162 | -2.121637 | 3.369605  |
| 59 | 6 | 0 | 2.024257  | 2.696252  | -1.184634 |
| 60 | 1 | 0 | 2.269036  | 3.484326  | -1.901568 |
| 61 | 1 | 0 | 1.536791  | 3.162735  | -0.321387 |
| 62 | 1 | 0 | 1.283124  | 2.035480  | -1.646781 |

-----  
2b-syn-GS1

Method: opt freq b3lyp/6-31+g(d,p) scrf(solvent=Chloroform)

SCF Done: E(RB3LYP) = -1461.81205939 A.U. after 1 cycles

Lowest frequency = 9.6479

Zero-point correction= 0.499738  
(Hartree/Particle)  
Thermal correction to Energy= 0.528737  
Thermal correction to Enthalpy= 0.529681  
Thermal correction to Gibbs Free Energy= 0.437627  
Sum of electronic and zero-point Energies= -1461.312322  
Sum of electronic and thermal Energies= -1461.283323  
Sum of electronic and thermal Enthalpies= -1461.282378  
Sum of electronic and thermal Free Energies= -1461.374432

Standard orientation:

| Center<br>Number | Atomic<br>Number | Atomic<br>Type | Coordinates (Angstroms) |           |           |
|------------------|------------------|----------------|-------------------------|-----------|-----------|
|                  |                  |                | X                       | Y         | Z         |
| 1                | 6                | 0              | 0.850067                | 2.846092  | -0.709467 |
| 2                | 6                | 0              | -0.533112               | 2.671478  | -0.738839 |
| 3                | 6                | 0              | -1.142507               | 1.432275  | -0.419043 |
| 4                | 6                | 0              | -0.280555               | 0.348376  | -0.153298 |
| 5                | 6                | 0              | 1.126236                | 0.500242  | -0.117496 |
| 6                | 6                | 0              | 1.666450                | 1.764171  | -0.390951 |
| 7                | 8                | 0              | -0.842707               | -0.856989 | 0.154506  |
| 8                | 6                | 0              | -0.062311               | -2.026965 | -0.163304 |
| 9                | 6                | 0              | 1.368041                | -1.880590 | 0.264935  |
| 10               | 6                | 0              | 1.946919                | -0.665962 | 0.264174  |
| 11               | 8                | 0              | -1.297104               | 3.768612  | -1.030626 |
| 12               | 6                | 0              | -2.558268               | 3.484506  | -1.668916 |
| 13               | 6                | 0              | -3.296093               | 2.399906  | -0.943400 |
| 14               | 6                | 0              | -2.621852               | 1.393980  | -0.351481 |
| 15               | 1                | 0              | 1.265850                | 3.819642  | -0.945089 |

|    |   |   |           |           |           |
|----|---|---|-----------|-----------|-----------|
| 16 | 1 | 0 | 2.743184  | 1.896485  | -0.361122 |
| 17 | 1 | 0 | -0.561756 | -2.848484 | 0.353927  |
| 18 | 1 | 0 | -0.140387 | -2.212070 | -1.248149 |
| 19 | 1 | 0 | 1.919593  | -2.774507 | 0.542245  |
| 20 | 1 | 0 | -3.107058 | 4.427860  | -1.657208 |
| 21 | 1 | 0 | -2.363680 | 3.213634  | -2.720408 |
| 22 | 1 | 0 | -4.380513 | 2.447503  | -0.901839 |
| 23 | 6 | 0 | 3.380216  | -0.474266 | 0.658463  |
| 24 | 6 | 0 | 4.415300  | -0.667184 | -0.317124 |
| 25 | 6 | 0 | 3.703086  | -0.111353 | 1.964309  |
| 26 | 6 | 0 | 4.138894  | -1.018080 | -1.671427 |
| 27 | 6 | 0 | 5.787488  | -0.494104 | 0.067458  |
| 28 | 6 | 0 | 5.069772  | 0.053973  | 2.320485  |
| 29 | 6 | 0 | 5.156613  | -1.194337 | -2.585504 |
| 30 | 1 | 0 | 3.107884  | -1.149010 | -1.981559 |
| 31 | 6 | 0 | 6.814614  | -0.687763 | -0.898646 |
| 32 | 6 | 0 | 6.082405  | -0.131732 | 1.407531  |
| 33 | 1 | 0 | 5.311014  | 0.331707  | 3.343158  |
| 34 | 6 | 0 | 6.510546  | -1.031009 | -2.197958 |
| 35 | 1 | 0 | 4.919774  | -1.460101 | -3.611816 |
| 36 | 1 | 0 | 7.849032  | -0.557640 | -0.590525 |
| 37 | 1 | 0 | 7.120167  | -0.000458 | 1.703129  |
| 38 | 1 | 0 | 7.303035  | -1.175411 | -2.926416 |
| 39 | 6 | 0 | -3.374480 | 0.351264  | 0.421249  |
| 40 | 6 | 0 | -4.096679 | -0.672629 | -0.279006 |
| 41 | 6 | 0 | -3.407917 | 0.408060  | 1.812054  |
| 42 | 6 | 0 | -4.077062 | -0.796222 | -1.699185 |
| 43 | 6 | 0 | -4.857473 | -1.634131 | 0.467219  |
| 44 | 6 | 0 | -4.166723 | -0.557782 | 2.528227  |
| 45 | 6 | 0 | -4.778887 | -1.795235 | -2.341817 |
| 46 | 1 | 0 | -3.496073 | -0.089643 | -2.281245 |
| 47 | 6 | 0 | -5.576492 | -2.648650 | -0.225115 |
| 48 | 6 | 0 | -4.871826 | -1.547628 | 1.884017  |
| 49 | 1 | 0 | -4.190577 | -0.499077 | 3.613436  |
| 50 | 6 | 0 | -5.542878 | -2.730878 | -1.600302 |
| 51 | 1 | 0 | -4.744217 | -1.867387 | -3.425275 |
| 52 | 1 | 0 | -6.154186 | -3.363527 | 0.355680  |
| 53 | 1 | 0 | -5.449958 | -2.271862 | 2.452328  |
| 54 | 1 | 0 | -6.094982 | -3.510656 | -2.116902 |
| 55 | 6 | 0 | -2.651960 | 1.463007  | 2.588233  |
| 56 | 1 | 0 | -1.575432 | 1.253155  | 2.600494  |
| 57 | 1 | 0 | -2.778568 | 2.457896  | 2.150391  |
| 58 | 1 | 0 | -2.993039 | 1.500031  | 3.626507  |
| 59 | 6 | 0 | 2.637411  | 0.097260  | 3.017145  |
| 60 | 1 | 0 | 3.080366  | 0.440793  | 3.955651  |
| 61 | 1 | 0 | 1.897174  | 0.839556  | 2.699946  |
| 62 | 1 | 0 | 2.089961  | -0.829945 | 3.220298  |

-----  
2b-syn-GS2

Method: opt freq b3lyp/6-31+g(d,p) scrf(solvent=Chloroform)

SCF Done: E(RB3LYP) = -1461.81252926 A.U. after 1 cycles

Lowest frequency = 9.6660

|                                            |              |
|--------------------------------------------|--------------|
| Zero-point correction=                     | 0.499838     |
| (Hartree/Particle)                         |              |
| Thermal correction to Energy=              | 0.528825     |
| Thermal correction to Enthalpy=            | 0.529769     |
| Thermal correction to Gibbs Free Energy=   | 0.437685     |
| Sum of electronic and zero-point Energies= | -1461.312691 |
| Sum of electronic and thermal Energies=    | -1461.283705 |

Sum of electronic and thermal Enthalpies= -1461.282761  
Sum of electronic and thermal Free Energies= -1461.374844

Standard orientation:

| Center<br>Number | Atomic<br>Number | Atomic<br>Type | Coordinates (Angstroms) |           |           |
|------------------|------------------|----------------|-------------------------|-----------|-----------|
|                  |                  |                | X                       | Y         | Z         |
| 1                | 6                | 0              | 0.591220                | -1.938409 | 2.169463  |
| 2                | 6                | 0              | -0.763744               | -2.000749 | 1.844151  |
| 3                | 6                | 0              | -1.294957               | -1.337222 | 0.709033  |
| 4                | 6                | 0              | -0.376750               | -0.672413 | -0.127660 |
| 5                | 6                | 0              | 1.008026                | -0.630639 | 0.157269  |
| 6                | 6                | 0              | 1.464279                | -1.257634 | 1.324928  |
| 7                | 8                | 0              | -0.848227               | -0.127471 | -1.287501 |
| 8                | 6                | 0              | -0.129937               | 1.018163  | -1.789481 |
| 9                | 6                | 0              | 1.354206                | 0.795892  | -1.770438 |
| 10               | 6                | 0              | 1.904380                | 0.018850  | -0.819241 |
| 11               | 8                | 0              | -1.586466               | -2.664384 | 2.711903  |
| 12               | 6                | 0              | -2.767353               | -3.238948 | 2.115280  |
| 13               | 6                | 0              | -3.473024               | -2.236680 | 1.251892  |
| 14               | 6                | 0              | -2.767765               | -1.330557 | 0.546662  |
| 15               | 1                | 0              | 0.944466                | -2.439126 | 3.064314  |
| 16               | 1                | 0              | 2.524081                | -1.234962 | 1.557712  |
| 17               | 1                | 0              | -0.414171               | 1.897970  | -1.188486 |
| 18               | 1                | 0              | -0.507432               | 1.166877  | -2.803004 |
| 19               | 1                | 0              | 1.962178                | 1.295728  | -2.519306 |
| 20               | 1                | 0              | -3.386414               | -3.562621 | 2.953686  |
| 21               | 1                | 0              | -2.467542               | -4.132856 | 1.543099  |
| 22               | 1                | 0              | -4.558484               | -2.253246 | 1.216186  |
| 23               | 6                | 0              | 3.383290                | -0.213492 | -0.746830 |
| 24               | 6                | 0              | 4.218810                | 0.738332  | -0.071475 |
| 25               | 6                | 0              | 3.940650                | -1.348573 | -1.332002 |
| 26               | 6                | 0              | 3.697487                | 1.904277  | 0.563033  |
| 27               | 6                | 0              | 5.636103                | 0.516895  | -0.014901 |
| 28               | 6                | 0              | 5.347276                | -1.545027 | -1.262742 |
| 29               | 6                | 0              | 4.527246                | 2.798523  | 1.206562  |
| 30               | 1                | 0              | 2.628622                | 2.085957  | 0.534741  |
| 31               | 6                | 0              | 6.465539                | 1.461366  | 0.652850  |
| 32               | 6                | 0              | 6.172550                | -0.644977 | -0.628357 |
| 33               | 1                | 0              | 5.772701                | -2.430417 | -1.727840 |
| 34               | 6                | 0              | 5.927324                | 2.579609  | 1.251472  |
| 35               | 1                | 0              | 4.105256                | 3.678272  | 1.684021  |
| 36               | 1                | 0              | 7.537310                | 1.281855  | 0.683079  |
| 37               | 1                | 0              | 7.245341                | -0.815842 | -0.588916 |
| 38               | 1                | 0              | 6.570455                | 3.292650  | 1.758930  |
| 39               | 6                | 0              | -3.491112               | -0.312658 | -0.285251 |
| 40               | 6                | 0              | -3.627892               | 1.029050  | 0.205863  |
| 41               | 6                | 0              | -4.062230               | -0.676612 | -1.500858 |
| 42               | 6                | 0              | -3.085780               | 1.447649  | 1.456248  |
| 43               | 6                | 0              | -4.343082               | 1.997644  | -0.574762 |
| 44               | 6                | 0              | -4.771805               | 0.299869  | -2.253389 |
| 45               | 6                | 0              | -3.232045               | 2.745446  | 1.901375  |
| 46               | 1                | 0              | -2.553749               | 0.729410  | 2.070340  |
| 47               | 6                | 0              | -4.476816               | 3.328351  | -0.088374 |
| 48               | 6                | 0              | -4.908892               | 1.595913  | -1.813357 |
| 49               | 1                | 0              | -5.207414               | 0.006646  | -3.205215 |
| 50               | 6                | 0              | -3.932539               | 3.699864  | 1.122152  |
| 51               | 1                | 0              | -2.809834               | 3.037828  | 2.858641  |
| 52               | 1                | 0              | -5.022778               | 4.049637  | -0.691507 |

|    |   |   |           |           |           |
|----|---|---|-----------|-----------|-----------|
| 53 | 1 | 0 | -5.451501 | 2.325723  | -2.408936 |
| 54 | 1 | 0 | -4.042644 | 4.718215  | 1.483464  |
| 55 | 6 | 0 | -3.932925 | -2.074496 | -2.066286 |
| 56 | 1 | 0 | -4.610423 | -2.777951 | -1.568007 |
| 57 | 1 | 0 | -2.918818 | -2.466298 | -1.945511 |
| 58 | 1 | 0 | -4.176962 | -2.081786 | -3.132444 |
| 59 | 6 | 0 | 3.088378  | -2.370841 | -2.050577 |
| 60 | 1 | 0 | 2.580537  | -1.930323 | -2.915687 |
| 61 | 1 | 0 | 2.307568  | -2.775245 | -1.397240 |
| 62 | 1 | 0 | 3.698491  | -3.205833 | -2.404862 |

2b-TS1-A-int-B-fix-down

Method: opt(ts,calcfc,noeigen) b3lyp/6-31+g(d,p) freq scrf(solvent=Chloroform)

SCF Done: E(RB3LYP) = -1461.76395522 A.U. after 1 cycles

Lowest frequency = -28.3606

Zero-point correction= 0.500654  
(Hartree/Particle)  
Thermal correction to Energy= 0.527990  
Thermal correction to Enthalpy= 0.528934  
Thermal correction to Gibbs Free Energy= 0.443339  
Sum of electronic and zero-point Energies= -1461.263301  
Sum of electronic and thermal Energies= -1461.235965  
Sum of electronic and thermal Enthalpies= -1461.235021  
Sum of electronic and thermal Free Energies= -1461.320616

Standard orientation:

| Center<br>Number | Atomic<br>Number | Atomic<br>Type | Coordinates (Angstroms) |           |           |
|------------------|------------------|----------------|-------------------------|-----------|-----------|
|                  |                  |                | X                       | Y         | Z         |
| 1                | 6                | 0              | -0.015140               | 3.607293  | -0.132594 |
| 2                | 6                | 0              | -1.252285               | 3.064609  | 0.206850  |
| 3                | 6                | 0              | -1.490973               | 1.671842  | 0.110513  |
| 4                | 6                | 0              | -0.381003               | 0.859616  | -0.193479 |
| 5                | 6                | 0              | 0.938823                | 1.364670  | -0.310081 |
| 6                | 6                | 0              | 1.057967                | 2.758548  | -0.397976 |
| 7                | 8                | 0              | -0.588875               | -0.471783 | -0.437293 |
| 8                | 6                | 0              | 0.187259                | -0.895886 | -1.579464 |
| 9                | 6                | 0              | 2.038034                | 0.360208  | -0.522053 |
| 10               | 8                | 0              | -2.267723               | 3.931324  | 0.502211  |
| 11               | 6                | 0              | -3.303154               | 3.380428  | 1.341919  |
| 12               | 6                | 0              | -3.769586               | 2.056794  | 0.813351  |
| 13               | 6                | 0              | -2.895230               | 1.214203  | 0.228443  |
| 14               | 1                | 0              | 0.101808                | 4.685248  | -0.166891 |
| 15               | 1                | 0              | 2.001739                | 3.199983  | -0.680168 |
| 16               | 1                | 0              | -0.030982               | -1.958376 | -1.705569 |
| 17               | 1                | 0              | -0.175292               | -0.360646 | -2.472545 |
| 18               | 1                | 0              | -2.908998               | 3.295463  | 2.368465  |
| 19               | 1                | 0              | -4.101911               | 4.123943  | 1.343410  |
| 20               | 1                | 0              | -4.820780               | 1.799018  | 0.904963  |
| 21               | 6                | 0              | 3.452133                | 0.385351  | -0.003996 |
| 22               | 6                | 0              | 4.191076                | -0.886450 | -0.002626 |
| 23               | 6                | 0              | 4.178164                | 1.507190  | 0.444012  |
| 24               | 6                | 0              | 3.571271                | -2.161452 | 0.173411  |
| 25               | 6                | 0              | 5.625810                | -0.888792 | -0.042405 |
| 26               | 6                | 0              | 5.603859                | 1.465109  | 0.423423  |
| 27               | 6                | 0              | 4.293513                | -3.339191 | 0.170363  |
| 28               | 1                | 0              | 2.506812                | -2.211326 | 0.362662  |

|    |   |   |           |           |           |
|----|---|---|-----------|-----------|-----------|
| 29 | 6 | 0 | 6.343053  | -2.115696 | -0.113908 |
| 30 | 6 | 0 | 6.315649  | 0.343552  | 0.091145  |
| 31 | 1 | 0 | 6.133660  | 2.380292  | 0.676586  |
| 32 | 6 | 0 | 5.693081  | -3.326718 | -0.028344 |
| 33 | 1 | 0 | 3.777886  | -4.280512 | 0.337481  |
| 34 | 1 | 0 | 7.426586  | -2.073423 | -0.190071 |
| 35 | 1 | 0 | 7.400315  | 0.363961  | 0.031760  |
| 36 | 1 | 0 | 6.250849  | -4.257889 | -0.063259 |
| 37 | 6 | 0 | -3.388530 | -0.081376 | -0.346303 |
| 38 | 6 | 0 | -3.608926 | -1.205787 | 0.516275  |
| 39 | 6 | 0 | -3.681452 | -0.168282 | -1.704635 |
| 40 | 6 | 0 | -3.313231 | -1.174465 | 1.910317  |
| 41 | 6 | 0 | -4.131030 | -2.424133 | -0.033742 |
| 42 | 6 | 0 | -4.196054 | -1.386964 | -2.226140 |
| 43 | 6 | 0 | -3.532051 | -2.274590 | 2.713187  |
| 44 | 1 | 0 | -2.906782 | -0.266553 | 2.342240  |
| 45 | 6 | 0 | -4.351148 | -3.540065 | 0.821849  |
| 46 | 6 | 0 | -4.415807 | -2.482535 | -1.423153 |
| 47 | 1 | 0 | -4.425215 | -1.442805 | -3.287322 |
| 48 | 6 | 0 | -4.060672 | -3.471282 | 2.167135  |
| 49 | 1 | 0 | -3.295255 | -2.225462 | 3.772271  |
| 50 | 1 | 0 | -4.753712 | -4.453539 | 0.391061  |
| 51 | 1 | 0 | -4.813752 | -3.402700 | -1.843513 |
| 52 | 1 | 0 | -4.231941 | -4.330169 | 2.809576  |
| 53 | 6 | 0 | -3.467124 | 0.998796  | -2.643218 |
| 54 | 1 | 0 | -2.404058 | 1.247983  | -2.742379 |
| 55 | 1 | 0 | -3.849897 | 0.770054  | -3.641441 |
| 56 | 1 | 0 | -3.970122 | 1.902561  | -2.283828 |
| 57 | 6 | 0 | 3.631233  | 2.778930  | 1.067180  |
| 58 | 1 | 0 | 3.667946  | 3.644363  | 0.395596  |
| 59 | 1 | 0 | 2.617404  | 2.672817  | 1.444452  |
| 60 | 1 | 0 | 4.272288  | 3.024740  | 1.920664  |
| 61 | 6 | 0 | 1.641093  | -0.677631 | -1.305356 |
| 62 | 1 | 0 | 2.332452  | -1.418408 | -1.682931 |

-----

2b-TS4-A-fix-up-B-int

Method: opt(ts,calcfc,noeigen) b3lyp/6-31+g(d,p) freq scrf(solvent=Chloroform)  
SCF Done: E(RB3LYP) = -1461.76076505 A.U. after 1 cycles  
Lowest frequency = -29.3997

Zero-point correction= 0.500226  
(Hartree/Particle)  
Thermal correction to Energy= 0.527692  
Thermal correction to Enthalpy= 0.528637  
Thermal correction to Gibbs Free Energy= 0.442409  
Sum of electronic and zero-point Energies= -1461.260539  
Sum of electronic and thermal Energies= -1461.233073  
Sum of electronic and thermal Enthalpies= -1461.232128  
Sum of electronic and thermal Free Energies= -1461.318356

Standard orientation:

| Center<br>Number | Atomic<br>Number | Atomic<br>Type | Coordinates (Angstroms) |           |           |
|------------------|------------------|----------------|-------------------------|-----------|-----------|
|                  |                  |                | X                       | Y         | Z         |
| 1                | 6                | 0              | -0.566958               | -2.172266 | -1.710893 |
| 2                | 6                | 0              | 0.708648                | -2.009545 | -1.172052 |
| 3                | 6                | 0              | 0.966547                | -1.164596 | -0.062047 |

|    |   |   |           |           |           |
|----|---|---|-----------|-----------|-----------|
| 4  | 6 | 0 | -0.161244 | -0.869216 | 0.727200  |
| 5  | 6 | 0 | -1.477565 | -1.008025 | 0.216196  |
| 6  | 6 | 0 | -1.649302 | -1.609486 | -1.038180 |
| 7  | 8 | 0 | 0.041494  | -0.436566 | 2.002140  |
| 8  | 6 | 0 | -1.044998 | -0.628148 | 2.934595  |
| 9  | 6 | 0 | -2.372700 | -0.265739 | 2.338767  |
| 10 | 6 | 0 | -2.594265 | -0.490122 | 1.030549  |
| 11 | 8 | 0 | 1.743938  | -2.766642 | -1.660655 |
| 12 | 6 | 0 | 2.555795  | -3.251570 | -0.551301 |
| 13 | 6 | 0 | 3.151452  | -2.069144 | 0.151499  |
| 14 | 6 | 0 | 2.419639  | -0.930244 | 0.250244  |
| 15 | 1 | 0 | -0.700524 | -2.781923 | -2.597855 |
| 16 | 1 | 0 | -2.650276 | -1.705788 | -1.446478 |
| 17 | 1 | 0 | -1.026994 | -1.680558 | 3.263481  |
| 18 | 1 | 0 | -0.794761 | -0.002350 | 3.793931  |
| 19 | 1 | 0 | -3.141937 | 0.141205  | 2.988601  |
| 20 | 1 | 0 | 1.921567  | -3.886792 | 0.084988  |
| 21 | 1 | 0 | 3.331513  | -3.871431 | -1.004308 |
| 22 | 1 | 0 | 4.209107  | -2.092155 | 0.383212  |
| 23 | 6 | 0 | -3.923204 | -0.221737 | 0.392532  |
| 24 | 6 | 0 | -4.118118 | 0.983592  | -0.364482 |
| 25 | 6 | 0 | -4.961243 | -1.139594 | 0.530586  |
| 26 | 6 | 0 | -3.090232 | 1.955746  | -0.533390 |
| 27 | 6 | 0 | -5.392417 | 1.237656  | -0.971709 |
| 28 | 6 | 0 | -6.216726 | -0.864681 | -0.082284 |
| 29 | 6 | 0 | -3.307585 | 3.105700  | -1.263884 |
| 30 | 1 | 0 | -2.122068 | 1.785503  | -0.075599 |
| 31 | 6 | 0 | -5.586357 | 2.433725  | -1.717502 |
| 32 | 6 | 0 | -6.431034 | 0.282677  | -0.808752 |
| 33 | 1 | 0 | -7.019143 | -1.589370 | 0.028744  |
| 34 | 6 | 0 | -4.567761 | 3.350535  | -1.864242 |
| 35 | 1 | 0 | -2.506858 | 3.830490  | -1.379654 |
| 36 | 1 | 0 | -6.558230 | 2.612373  | -2.170698 |
| 37 | 1 | 0 | -7.397445 | 0.469229  | -1.270107 |
| 38 | 1 | 0 | -4.727249 | 4.259958  | -2.436099 |
| 39 | 6 | 0 | 3.162653  | 0.375432  | 0.407797  |
| 40 | 6 | 0 | 4.515110  | 0.421746  | -0.167247 |
| 41 | 6 | 0 | 2.722547  | 1.546273  | 1.050297  |
| 42 | 6 | 0 | 4.942542  | -0.394374 | -1.261075 |
| 43 | 6 | 0 | 5.455874  | 1.411958  | 0.276076  |
| 44 | 6 | 0 | 3.678989  | 2.525603  | 1.447807  |
| 45 | 6 | 0 | 6.219589  | -0.323396 | -1.780139 |
| 46 | 1 | 0 | 4.235400  | -1.065935 | -1.729709 |
| 47 | 6 | 0 | 6.787390  | 1.421972  | -0.228485 |
| 48 | 6 | 0 | 5.014087  | 2.428875  | 1.158256  |
| 49 | 1 | 0 | 3.316144  | 3.375626  | 2.020122  |
| 50 | 6 | 0 | 7.176358  | 0.561088  | -1.229040 |
| 51 | 1 | 0 | 6.484295  | -0.947087 | -2.629229 |
| 52 | 1 | 0 | 7.481083  | 2.158479  | 0.169038  |
| 53 | 1 | 0 | 5.720752  | 3.169895  | 1.522093  |
| 54 | 1 | 0 | 8.188876  | 0.588065  | -1.620856 |
| 55 | 6 | 0 | 1.292373  | 1.945916  | 1.339134  |
| 56 | 1 | 0 | 0.586903  | 1.508667  | 0.636091  |
| 57 | 1 | 0 | 0.972768  | 1.680852  | 2.348844  |
| 58 | 1 | 0 | 1.219717  | 3.034036  | 1.242742  |
| 59 | 6 | 0 | -4.806564 | -2.424297 | 1.316217  |
| 60 | 1 | 0 | -3.817469 | -2.870370 | 1.182320  |
| 61 | 1 | 0 | -4.938988 | -2.251930 | 2.391286  |
| 62 | 1 | 0 | -5.557571 | -3.156916 | 1.006937  |



2b-TS2-A-ext-B-fix-up

Method: opt(ts,calcfc,noeigen) b3lyp/6-31+g(d,p) freq scrf(solvent=Chloroform)

SCF Done: E(RB3LYP) = -1461.75091465 A.U. after 2 cycles

Lowest frequency = -68.6439

Zero-point correction= 0.500548  
 (Hartree/Particle)  
 Thermal correction to Energy= 0.528023  
 Thermal correction to Enthalpy= 0.528967  
 Thermal correction to Gibbs Free Energy= 0.442470  
 Sum of electronic and zero-point Energies= -1461.250366  
 Sum of electronic and thermal Energies= -1461.222892  
 Sum of electronic and thermal Enthalpies= -1461.221947  
 Sum of electronic and thermal Free Energies= -1461.308445

Standard orientation:

| Center<br>Number | Atomic<br>Number | Atomic<br>Type | Coordinates (Angstroms) |           |           |
|------------------|------------------|----------------|-------------------------|-----------|-----------|
|                  |                  |                | X                       | Y         | Z         |
| 1                | 6                | 0              | 0.597488                | 2.575994  | -1.520720 |
| 2                | 6                | 0              | -0.439291               | 2.591231  | -0.591539 |
| 3                | 6                | 0              | -0.910207               | 1.388998  | -0.011472 |
| 4                | 6                | 0              | -0.175738               | 0.219807  | -0.295574 |
| 5                | 6                | 0              | 1.051172                | 0.221590  | -1.016098 |
| 6                | 6                | 0              | 1.317786                | 1.401639  | -1.728240 |
| 7                | 8                | 0              | -0.710753               | -0.983313 | 0.069360  |
| 8                | 6                | 0              | -0.494244               | -1.940707 | -0.997263 |
| 9                | 6                | 0              | 1.821640                | -1.086170 | -1.033698 |
| 10               | 8                | 0              | -1.086319               | 3.775916  | -0.381049 |
| 11               | 6                | 0              | -1.763715               | 3.876913  | 0.888669  |
| 12               | 6                | 0              | -2.609175               | 2.664266  | 1.138972  |
| 13               | 6                | 0              | -2.194300               | 1.450165  | 0.726289  |
| 14               | 1                | 0              | 0.844908                | 3.484773  | -2.058726 |
| 15               | 1                | 0              | 2.078629                | 1.417684  | -2.492701 |
| 16               | 1                | 0              | -0.992779               | -2.856817 | -0.677665 |
| 17               | 1                | 0              | -0.991598               | -1.563617 | -1.903624 |
| 18               | 1                | 0              | -1.004281               | 4.015457  | 1.676144  |
| 19               | 1                | 0              | -2.362094               | 4.787342  | 0.826641  |
| 20               | 1                | 0              | -3.557831               | 2.787016  | 1.653433  |
| 21               | 6                | 0              | 3.257270                | -1.253679 | -0.545966 |
| 22               | 6                | 0              | 4.128944                | -0.118530 | -0.239059 |
| 23               | 6                | 0              | 3.751399                | -2.513789 | -0.128689 |
| 24               | 6                | 0              | 4.188934                | 1.071426  | -1.012353 |
| 25               | 6                | 0              | 5.098339                | -0.210358 | 0.819984  |
| 26               | 6                | 0              | 4.784113                | -2.584719 | 0.849017  |
| 27               | 6                | 0              | 4.987270                | 2.146811  | -0.672363 |
| 28               | 1                | 0              | 3.666456                | 1.105353  | -1.950220 |
| 29               | 6                | 0              | 5.864649                | 0.927433  | 1.197996  |
| 30               | 6                | 0              | 5.363950                | -1.473288 | 1.401195  |
| 31               | 1                | 0              | 5.079448                | -3.570982 | 1.196635  |
| 32               | 6                | 0              | 5.796010                | 2.103473  | 0.484646  |
| 33               | 1                | 0              | 5.009080                | 3.020197  | -1.317925 |
| 34               | 1                | 0              | 6.548879                | 0.828046  | 2.036765  |
| 35               | 1                | 0              | 6.085476                | -1.557048 | 2.209041  |
| 36               | 1                | 0              | 6.398557                | 2.961102  | 0.768512  |
| 37               | 6                | 0              | -3.064042               | 0.252348  | 0.971990  |
| 38               | 6                | 0              | -3.904424               | -0.235533 | -0.083485 |
| 39               | 6                | 0              | -3.090539               | -0.348429 | 2.226140  |

|    |   |   |           |           |           |
|----|---|---|-----------|-----------|-----------|
| 40 | 6 | 0 | -3.927509 | 0.356095  | -1.379996 |
| 41 | 6 | 0 | -4.762261 | -1.359455 | 0.159362  |
| 42 | 6 | 0 | -3.952337 | -1.459151 | 2.444075  |
| 43 | 6 | 0 | -4.743707 | -0.137465 | -2.377198 |
| 44 | 1 | 0 | -3.295062 | 1.213953  | -1.581520 |
| 45 | 6 | 0 | -5.593618 | -1.844215 | -0.888915 |
| 46 | 6 | 0 | -4.761752 | -1.954937 | 1.448512  |
| 47 | 1 | 0 | -3.959909 | -1.926366 | 3.425596  |
| 48 | 6 | 0 | -5.586643 | -1.250400 | -2.132884 |
| 49 | 1 | 0 | -4.743000 | 0.332195  | -3.356788 |
| 50 | 1 | 0 | -6.240225 | -2.695004 | -0.688295 |
| 51 | 1 | 0 | -5.409093 | -2.807530 | 1.637760  |
| 52 | 1 | 0 | -6.226816 | -1.628839 | -2.924545 |
| 53 | 6 | 0 | -2.216383 | 0.129591  | 3.365420  |
| 54 | 1 | 0 | -1.197493 | 0.346492  | 3.031341  |
| 55 | 1 | 0 | -2.608331 | 1.048889  | 3.816690  |
| 56 | 1 | 0 | -2.162093 | -0.627423 | 4.152889  |
| 57 | 6 | 0 | 3.290487  | -3.878377 | -0.603702 |
| 58 | 1 | 0 | 2.434367  | -4.263275 | -0.034641 |
| 59 | 1 | 0 | 3.032860  | -3.892457 | -1.665353 |
| 60 | 1 | 0 | 4.107285  | -4.591023 | -0.458595 |
| 61 | 6 | 0 | 0.979931  | -2.151117 | -1.143848 |
| 62 | 1 | 0 | 1.304252  | -3.173701 | -1.142567 |

2b-TS4-A-fix-down-B-int

Method: opt(ts,calcfc,noeigen) b3lyp/6-31+g(d,p) freq scrf(solvent=Chloroform)  
 SCF Done: E(RB3LYP) = -1461.76091893 A.U. after 1 cycles  
 Lowest frequency = -24.5050

Zero-point correction= 0.500289  
 (Hartree/Particle)  
 Thermal correction to Energy= 0.527736  
 Thermal correction to Enthalpy= 0.528680  
 Thermal correction to Gibbs Free Energy= 0.442413  
 Sum of electronic and zero-point Energies= -1461.260630  
 Sum of electronic and thermal Energies= -1461.233183  
 Sum of electronic and thermal Enthalpies= -1461.232239  
 Sum of electronic and thermal Free Energies= -1461.318506

Standard orientation:

| Center<br>Number | Atomic<br>Number | Atomic<br>Type | Coordinates (Angstroms) |           |           |
|------------------|------------------|----------------|-------------------------|-----------|-----------|
|                  |                  |                | X                       | Y         | Z         |
| 1                | 6                | 0              | 0.556135                | 2.229086  | -1.225031 |
| 2                | 6                | 0              | -0.704133               | 2.047317  | -0.656686 |
| 3                | 6                | 0              | -1.030908               | 0.913028  | 0.130199  |
| 4                | 6                | 0              | 0.077187                | 0.233297  | 0.670552  |
| 5                | 6                | 0              | 1.374447                | 0.375742  | 0.113977  |
| 6                | 6                | 0              | 1.575275                | 1.344360  | -0.879221 |
| 7                | 8                | 0              | -0.125633               | -0.577092 | 1.745517  |
| 8                | 6                | 0              | 1.021141                | -0.839653 | 2.584040  |
| 9                | 6                | 0              | 2.250011                | -1.144851 | 1.780177  |
| 10               | 6                | 0              | 2.437286                | -0.524872 | 0.600257  |
| 11               | 8                | 0              | -1.640602               | 3.044124  | -0.770988 |
| 12               | 6                | 0              | -2.322854               | 3.217268  | 0.505566  |
| 13               | 6                | 0              | -3.050421               | 1.947373  | 0.829405  |
| 14               | 6                | 0              | -2.486642               | 0.763272  | 0.479390  |

|    |   |   |           |           |           |
|----|---|---|-----------|-----------|-----------|
| 15 | 1 | 0 | 0.736722  | 3.085119  | -1.865986 |
| 16 | 1 | 0 | 2.560503  | 1.454401  | -1.320865 |
| 17 | 1 | 0 | 1.173440  | 0.038506  | 3.233397  |
| 18 | 1 | 0 | 0.723911  | -1.678889 | 3.216377  |
| 19 | 1 | 0 | 2.979832  | -1.839885 | 2.185117  |
| 20 | 1 | 0 | -1.575314 | 3.516689  | 1.255301  |
| 21 | 1 | 0 | -3.020484 | 4.043141  | 0.355869  |
| 22 | 1 | 0 | -4.081741 | 2.017534  | 1.152286  |
| 23 | 6 | 0 | 3.663622  | -0.747836 | -0.231361 |
| 24 | 6 | 0 | 4.872197  | -0.040245 | 0.084885  |
| 25 | 6 | 0 | 3.628385  | -1.635056 | -1.305570 |
| 26 | 6 | 0 | 4.956570  | 0.898977  | 1.154825  |
| 27 | 6 | 0 | 6.048337  | -0.265929 | -0.707039 |
| 28 | 6 | 0 | 4.806797  | -1.841107 | -2.073897 |
| 29 | 6 | 0 | 6.132861  | 1.564374  | 1.430435  |
| 30 | 1 | 0 | 4.076445  | 1.088700  | 1.759335  |
| 31 | 6 | 0 | 7.248082  | 0.432595  | -0.393065 |
| 32 | 6 | 0 | 5.980865  | -1.182946 | -1.787919 |
| 33 | 1 | 0 | 4.770550  | -2.541373 | -2.904242 |
| 34 | 6 | 0 | 7.294442  | 1.328589  | 0.652605  |
| 35 | 1 | 0 | 6.170213  | 2.276634  | 2.249785  |
| 36 | 1 | 0 | 8.131344  | 0.246325  | -0.998828 |
| 37 | 1 | 0 | 6.869777  | -1.358157 | -2.388522 |
| 38 | 1 | 0 | 8.215476  | 1.856628  | 0.881534  |
| 39 | 6 | 0 | -3.400778 | -0.420090 | 0.266388  |
| 40 | 6 | 0 | -4.772527 | -0.107580 | -0.161169 |
| 41 | 6 | 0 | -3.102137 | -1.782998 | 0.441810  |
| 42 | 6 | 0 | -5.131818 | 1.075752  | -0.879366 |
| 43 | 6 | 0 | -5.822846 | -1.070277 | 0.018055  |
| 44 | 6 | 0 | -4.168734 | -2.718261 | 0.582327  |
| 45 | 6 | 0 | -6.429964 | 1.337307  | -1.269036 |
| 46 | 1 | 0 | -4.359747 | 1.777468  | -1.166019 |
| 47 | 6 | 0 | -7.165364 | -0.750236 | -0.332402 |
| 48 | 6 | 0 | -5.488666 | -2.371286 | 0.468863  |
| 49 | 1 | 0 | -3.904038 | -3.748828 | 0.805035  |
| 50 | 6 | 0 | -7.475590 | 0.438853  | -0.951584 |
| 51 | 1 | 0 | -6.643875 | 2.238791  | -1.836121 |
| 52 | 1 | 0 | -7.937224 | -1.489963 | -0.135440 |
| 53 | 1 | 0 | -6.275559 | -3.102517 | 0.632806  |
| 54 | 1 | 0 | -8.499642 | 0.667020  | -1.232105 |
| 55 | 6 | 0 | -1.732021 | -2.424608 | 0.447420  |
| 56 | 1 | 0 | -1.003018 | -1.862277 | -0.131630 |
| 57 | 1 | 0 | -1.332234 | -2.561436 | 1.454201  |
| 58 | 1 | 0 | -1.821490 | -3.414609 | -0.011498 |
| 59 | 6 | 0 | 2.371274  | -2.392464 | -1.669991 |
| 60 | 1 | 0 | 1.992653  | -2.972400 | -0.821661 |
| 61 | 1 | 0 | 1.567581  | -1.712370 | -1.974140 |
| 62 | 1 | 0 | 2.558735  | -3.081866 | -2.497251 |

-----  
2b-TS3-A-fix-down-B-ext

Method: opt(ts,calcfc,noeigen) b3lyp/6-31+g(d,p) freq scrf(solvent=Chloroform)  
 SCF Done: E(RB3LYP) = -1461.76050922 A.U. after 1 cycles  
 Lowest frequency = -31.3555

|                                          |          |
|------------------------------------------|----------|
| Zero-point correction=                   | 0.500215 |
| (Hartree/Particle)                       |          |
| Thermal correction to Energy=            | 0.527713 |
| Thermal correction to Enthalpy=          | 0.528657 |
| Thermal correction to Gibbs Free Energy= | 0.442196 |

|                                              |              |
|----------------------------------------------|--------------|
| Sum of electronic and zero-point Energies=   | -1461.260294 |
| Sum of electronic and thermal Energies=      | -1461.232796 |
| Sum of electronic and thermal Enthalpies=    | -1461.231852 |
| Sum of electronic and thermal Free Energies= | -1461.318313 |

Standard orientation:

| Center<br>Number | Atomic<br>Number | Atomic<br>Type | Coordinates (Angstroms) |           |           |
|------------------|------------------|----------------|-------------------------|-----------|-----------|
|                  |                  |                | X                       | Y         | Z         |
| 1                | 6                | 0              | 0.585932                | 2.618711  | -1.105778 |
| 2                | 6                | 0              | -0.713707               | 2.521394  | -0.610708 |
| 3                | 6                | 0              | -1.194499               | 1.364744  | 0.058999  |
| 4                | 6                | 0              | -0.185790               | 0.529556  | 0.578630  |
| 5                | 6                | 0              | 1.146001                | 0.583712  | 0.091918  |
| 6                | 6                | 0              | 1.493828                | 1.608120  | -0.798591 |
| 7                | 8                | 0              | -0.518857               | -0.357177 | 1.560385  |
| 8                | 6                | 0              | 0.553009                | -0.798847 | 2.422872  |
| 9                | 6                | 0              | 1.784495                | -1.158450 | 1.646342  |
| 10               | 6                | 0              | 2.088543                | -0.461671 | 0.535542  |
| 11               | 8                | 0              | -1.535567               | 3.617629  | -0.683710 |
| 12               | 6                | 0              | -2.273854               | 3.759704  | 0.564504  |
| 13               | 6                | 0              | -3.139655               | 2.549382  | 0.739278  |
| 14               | 6                | 0              | -2.678239               | 1.344272  | 0.321609  |
| 15               | 1                | 0              | 0.882118                | 3.502662  | -1.659991 |
| 16               | 1                | 0              | 2.506335                | 1.653195  | -1.186546 |
| 17               | 1                | 0              | 0.755612                | 0.005637  | 3.149312  |
| 18               | 1                | 0              | 0.143402                | -1.651794 | 2.967160  |
| 19               | 1                | 0              | 2.421131                | -1.957622 | 2.014719  |
| 20               | 1                | 0              | -1.547960               | 3.920135  | 1.375510  |
| 21               | 1                | 0              | -2.876261               | 4.662329  | 0.448547  |
| 22               | 1                | 0              | -4.178994               | 2.694507  | 1.008633  |
| 23               | 6                | 0              | 3.323683                | -0.737784 | -0.266503 |
| 24               | 6                | 0              | 4.583142                | -0.198535 | 0.163103  |
| 25               | 6                | 0              | 3.247108                | -1.509944 | -1.424281 |
| 26               | 6                | 0              | 4.714500                | 0.620118  | 1.323526  |
| 27               | 6                | 0              | 5.765389                | -0.473504 | -0.603813 |
| 28               | 6                | 0              | 4.432689                | -1.768233 | -2.165311 |
| 29               | 6                | 0              | 5.939298                | 1.125573  | 1.706623  |
| 30               | 1                | 0              | 3.831577                | 0.845354  | 1.911470  |
| 31               | 6                | 0              | 7.015111                | 0.058611  | -0.178476 |
| 32               | 6                | 0              | 5.653960                | -1.270792 | -1.772412 |
| 33               | 1                | 0              | 4.363094                | -2.378444 | -3.061951 |
| 34               | 6                | 0              | 7.105271                | 0.840972  | 0.952056  |
| 35               | 1                | 0              | 6.011964                | 1.748479  | 2.593612  |
| 36               | 1                | 0              | 7.901567                | -0.163457 | -0.767277 |
| 37               | 1                | 0              | 6.547161                | -1.483051 | -2.354397 |
| 38               | 1                | 0              | 8.064366                | 1.242613  | 1.265689  |
| 39               | 6                | 0              | -3.734396               | 0.331421  | -0.067494 |
| 40               | 6                | 0              | -3.677308               | -1.112836 | 0.119814  |
| 41               | 6                | 0              | -4.931905               | 0.849273  | -0.610741 |
| 42               | 6                | 0              | -2.471912               | -1.860763 | 0.184589  |
| 43               | 6                | 0              | -4.895868               | -1.878398 | 0.141492  |
| 44               | 6                | 0              | -6.112086               | 0.051669  | -0.621787 |
| 45               | 6                | 0              | -2.460888               | -3.228901 | 0.378973  |
| 46               | 1                | 0              | -1.532902               | -1.362740 | 0.034528  |
| 47               | 6                | 0              | -4.862249               | -3.277111 | 0.395209  |
| 48               | 6                | 0              | -6.123236               | -1.243591 | -0.178539 |
| 49               | 1                | 0              | -7.029835               | 0.504523  | -0.988469 |
| 50               | 6                | 0              | -3.666840               | -3.948612 | 0.528761  |

|    |   |   |           |           |           |
|----|---|---|-----------|-----------|-----------|
| 51 | 1 | 0 | -1.510499 | -3.754883 | 0.400802  |
| 52 | 1 | 0 | -5.806483 | -3.813859 | 0.440178  |
| 53 | 1 | 0 | -7.045638 | -1.817457 | -0.148557 |
| 54 | 1 | 0 | -3.649994 | -5.020184 | 0.704773  |
| 55 | 6 | 0 | -5.097260 | 2.196675  | -1.300112 |
| 56 | 1 | 0 | -5.668471 | 2.916019  | -0.701633 |
| 57 | 1 | 0 | -4.146143 | 2.660028  | -1.561364 |
| 58 | 1 | 0 | -5.664978 | 2.039141  | -2.224434 |
| 59 | 6 | 0 | 1.936494  | -2.087114 | -1.910002 |
| 60 | 1 | 0 | 1.442657  | -2.674309 | -1.128789 |
| 61 | 1 | 0 | 1.235969  | -1.297536 | -2.205145 |
| 62 | 1 | 0 | 2.094031  | -2.735844 | -2.775523 |

-----  
2b-TS3-A-fix-up-B-ext

Method: opt(ts,calcfc,noeigen) b3lyp/6-31+g(d,p) freq scrf(solvent=Chloroform)  
SCF Done: E(RB3LYP) = -1461.76041610 A.U. after 1 cycles  
Lowest frequency = -34.2921

Zero-point correction= 0.500253  
(Hartree/Particle)  
Thermal correction to Energy= 0.527702  
Thermal correction to Enthalpy= 0.528646  
Thermal correction to Gibbs Free Energy= 0.442799  
Sum of electronic and zero-point Energies= -1461.260163  
Sum of electronic and thermal Energies= -1461.232715  
Sum of electronic and thermal Enthalpies= -1461.231770  
Sum of electronic and thermal Free Energies= -1461.317618

Standard orientation:

| Center<br>Number | Atomic<br>Number | Atomic<br>Type | Coordinates (Angstroms) |           |           |
|------------------|------------------|----------------|-------------------------|-----------|-----------|
|                  |                  |                | X                       | Y         | Z         |
| 1                | 6                | 0              | -0.559892               | -2.784175 | -1.244822 |
| 2                | 6                | 0              | 0.768137                | -2.583099 | -0.871550 |
| 3                | 6                | 0              | 1.175403                | -1.507817 | -0.037742 |
| 4                | 6                | 0              | 0.141042                | -0.943770 | 0.734855  |
| 5                | 6                | 0              | -1.223415               | -1.110313 | 0.382434  |
| 6                | 6                | 0              | -1.544631               | -1.994933 | -0.655551 |
| 7                | 8                | 0              | 0.479600                | -0.209742 | 1.833759  |
| 8                | 6                | 0              | -0.522236               | -0.091334 | 2.868127  |
| 9                | 6                | 0              | -1.878599               | 0.208849  | 2.303708  |
| 10               | 6                | 0              | -2.230645               | -0.319958 | 1.117296  |
| 11               | 8                | 0              | 1.709690                | -3.510295 | -1.241179 |
| 12               | 6                | 0              | 2.612326                | -3.762377 | -0.125410 |
| 13               | 6                | 0              | 3.328414                | -2.486590 | 0.198016  |
| 14               | 6                | 0              | 2.665034                | -1.309999 | 0.074562  |
| 15               | 1                | 0              | -0.806396               | -3.585304 | -1.933037 |
| 16               | 1                | 0              | -2.583458               | -2.118117 | -0.944519 |
| 17               | 1                | 0              | -0.525752               | -1.031513 | 3.444346  |
| 18               | 1                | 0              | -0.160262               | 0.705087  | 3.520991  |
| 19               | 1                | 0              | -2.561119               | 0.824516  | 2.882202  |
| 20               | 1                | 0              | 2.022142                | -4.175514 | 0.706124  |
| 21               | 1                | 0              | 3.307606                | -4.526823 | -0.476539 |
| 22               | 1                | 0              | 4.403501                | -2.518588 | 0.328435  |
| 23               | 6                | 0              | -3.594129               | -0.117317 | 0.530289  |
| 24               | 6                | 0              | -3.781949               | 0.856048  | -0.509796 |
| 25               | 6                | 0              | -4.671243               | -0.871448 | 0.988716  |
| 26               | 6                | 0              | -2.714453               | 1.655021  | -1.012112 |

|    |   |   |           |           |           |
|----|---|---|-----------|-----------|-----------|
| 27 | 6 | 0 | -5.088846 | 1.049645  | -1.067842 |
| 28 | 6 | 0 | -5.958863 | -0.660385 | 0.418492  |
| 29 | 6 | 0 | -2.925553 | 2.583669  | -2.010295 |
| 30 | 1 | 0 | -1.719901 | 1.528860  | -0.598879 |
| 31 | 6 | 0 | -5.275239 | 2.016390  | -2.094944 |
| 32 | 6 | 0 | -6.166675 | 0.266882  | -0.574954 |
| 33 | 1 | 0 | -6.791972 | -1.256812 | 0.781325  |
| 34 | 6 | 0 | -4.218390 | 2.768743  | -2.560450 |
| 35 | 1 | 0 | -2.094278 | 3.178674  | -2.377431 |
| 36 | 1 | 0 | -6.272096 | 2.151888  | -2.506924 |
| 37 | 1 | 0 | -7.158311 | 0.407962  | -0.997322 |
| 38 | 1 | 0 | -4.372472 | 3.503602  | -3.345164 |
| 39 | 6 | 0 | 3.522872  | -0.095119 | -0.210046 |
| 40 | 6 | 0 | 3.302781  | 1.265834  | 0.262675  |
| 41 | 6 | 0 | 4.699123  | -0.318478 | -0.960977 |
| 42 | 6 | 0 | 2.028307  | 1.797993  | 0.592772  |
| 43 | 6 | 0 | 4.404098  | 2.191021  | 0.312884  |
| 44 | 6 | 0 | 5.754739  | 0.637487  | -0.931801 |
| 45 | 6 | 0 | 1.863438  | 3.090881  | 1.051999  |
| 46 | 1 | 0 | 1.151368  | 1.197653  | 0.442208  |
| 47 | 6 | 0 | 4.220823  | 3.499529  | 0.838478  |
| 48 | 6 | 0 | 5.653272  | 1.818025  | -0.245920 |
| 49 | 1 | 0 | 6.669772  | 0.402807  | -1.469782 |
| 50 | 6 | 0 | 2.974642  | 3.946500  | 1.219296  |
| 51 | 1 | 0 | 0.863055  | 3.453653  | 1.271140  |
| 52 | 1 | 0 | 5.085058  | 4.156603  | 0.893904  |
| 53 | 1 | 0 | 6.489585  | 2.510191  | -0.195562 |
| 54 | 1 | 0 | 2.840703  | 4.953669  | 1.602965  |
| 55 | 6 | 0 | 4.949047  | -1.477838 | -1.915695 |
| 56 | 1 | 0 | 5.678918  | -2.199500 | -1.530535 |
| 57 | 1 | 0 | 4.040244  | -2.023854 | -2.167689 |
| 58 | 1 | 0 | 5.370703  | -1.071541 | -2.842309 |
| 59 | 6 | 0 | -4.526846 | -1.911504 | 2.079136  |
| 60 | 1 | 0 | -3.581291 | -2.455090 | 2.005151  |
| 61 | 1 | 0 | -4.556903 | -1.451842 | 3.074550  |
| 62 | 1 | 0 | -5.344117 | -2.636752 | 2.028742  |

-----  
2b-TS2-A-ext-B-fix-down

Method: opt(ts,calcfc,noeigen) b3lyp/6-31+g(d,p) freq scrf(solvent=Chloroform)  
SCF Done: E(RB3LYP) = -1461.75043526 A.U. after 1 cycles  
Lowest frequency = -67.9539

Zero-point correction= 0.500441  
(Hartree/Particle)  
Thermal correction to Energy= 0.527952  
Thermal correction to Enthalpy= 0.528896  
Thermal correction to Gibbs Free Energy= 0.442260  
Sum of electronic and zero-point Energies= -1461.249995  
Sum of electronic and thermal Energies= -1461.222483  
Sum of electronic and thermal Enthalpies= -1461.221539  
Sum of electronic and thermal Free Energies= -1461.308175

Standard orientation:

| Center<br>Number | Atomic<br>Number | Atomic<br>Type | Coordinates (Angstroms) |          |           |
|------------------|------------------|----------------|-------------------------|----------|-----------|
|                  |                  |                | X                       | Y        | Z         |
| 1                | 6                | 0              | 0.847962                | 3.086076 | -0.795700 |
| 2                | 6                | 0              | -0.350289               | 2.855109 | -0.125457 |

|    |   |   |           |           |           |
|----|---|---|-----------|-----------|-----------|
| 3  | 6 | 0 | -0.940849 | 1.568908  | -0.120364 |
| 4  | 6 | 0 | -0.178071 | 0.519786  | -0.672144 |
| 5  | 6 | 0 | 1.167555  | 0.676538  | -1.108162 |
| 6  | 6 | 0 | 1.581693  | 2.006676  | -1.283069 |
| 7  | 8 | 0 | -0.787930 | -0.687127 | -0.866216 |
| 8  | 6 | 0 | -0.365516 | -1.236552 | -2.138370 |
| 9  | 6 | 0 | 1.916830  | -0.599130 | -1.446393 |
| 10 | 8 | 0 | -1.009903 | 3.934177  | 0.390831  |
| 11 | 6 | 0 | -1.912239 | 3.625214  | 1.473582  |
| 12 | 6 | 0 | -2.809997 | 2.481642  | 1.106877  |
| 13 | 6 | 0 | -2.343564 | 1.470921  | 0.346664  |
| 14 | 1 | 0 | 1.207599  | 4.102889  | -0.911071 |
| 15 | 1 | 0 | 2.479022  | 2.230211  | -1.837952 |
| 16 | 1 | 0 | -0.925387 | -2.164706 | -2.260058 |
| 17 | 1 | 0 | -0.663523 | -0.535009 | -2.932752 |
| 18 | 1 | 0 | -1.311961 | 3.403436  | 2.371631  |
| 19 | 1 | 0 | -2.473014 | 4.543538  | 1.655206  |
| 20 | 1 | 0 | -3.837574 | 2.490429  | 1.458673  |
| 21 | 6 | 0 | 3.227905  | -1.031605 | -0.797364 |
| 22 | 6 | 0 | 4.029607  | -0.141077 | 0.043226  |
| 23 | 6 | 0 | 3.622713  | -2.391273 | -0.768582 |
| 24 | 6 | 0 | 4.257461  | 1.231559  | -0.241929 |
| 25 | 6 | 0 | 4.764151  | -0.664525 | 1.163860  |
| 26 | 6 | 0 | 4.436791  | -2.872788 | 0.295831  |
| 27 | 6 | 0 | 4.979948  | 2.060530  | 0.594943  |
| 28 | 1 | 0 | 3.938474  | 1.622234  | -1.190595 |
| 29 | 6 | 0 | 5.447437  | 0.212533  | 2.051766  |
| 30 | 6 | 0 | 4.898119  | -2.066890 | 1.302919  |
| 31 | 1 | 0 | 4.650873  | -3.937816 | 0.321585  |
| 32 | 6 | 0 | 5.535402  | 1.562681  | 1.794215  |
| 33 | 1 | 0 | 5.141723  | 3.096343  | 0.310422  |
| 34 | 1 | 0 | 5.946796  | -0.219791 | 2.915076  |
| 35 | 1 | 0 | 5.440372  | -2.478174 | 2.149670  |
| 36 | 1 | 0 | 6.075303  | 2.222250  | 2.467003  |
| 37 | 6 | 0 | -3.271927 | 0.361796  | -0.053472 |
| 38 | 6 | 0 | -3.549988 | -0.700733 | 0.868466  |
| 39 | 6 | 0 | -3.902036 | 0.399865  | -1.294276 |
| 40 | 6 | 0 | -2.921114 | -0.795361 | 2.144260  |
| 41 | 6 | 0 | -4.483575 | -1.726802 | 0.500469  |
| 42 | 6 | 0 | -4.820897 | -0.629488 | -1.636954 |
| 43 | 6 | 0 | -3.207201 | -1.832184 | 3.007823  |
| 44 | 1 | 0 | -2.202846 | -0.036732 | 2.435112  |
| 45 | 6 | 0 | -4.762070 | -2.780272 | 1.416193  |
| 46 | 6 | 0 | -5.107224 | -1.661557 | -0.772891 |
| 47 | 1 | 0 | -5.310443 | -0.588094 | -2.606713 |
| 48 | 6 | 0 | -4.140821 | -2.835400 | 2.644942  |
| 49 | 1 | 0 | -2.711202 | -1.882893 | 3.972986  |
| 50 | 1 | 0 | -5.476960 | -3.546049 | 1.125277  |
| 51 | 1 | 0 | -5.816877 | -2.435319 | -1.054836 |
| 52 | 1 | 0 | -4.360734 | -3.645252 | 3.334564  |
| 53 | 6 | 0 | -3.633587 | 1.506361  | -2.290227 |
| 54 | 1 | 0 | -3.798767 | 2.494793  | -1.848760 |
| 55 | 1 | 0 | -2.595793 | 1.488195  | -2.643304 |
| 56 | 1 | 0 | -4.284639 | 1.410328  | -3.163284 |
| 57 | 6 | 0 | 3.263020  | -3.468126 | -1.774205 |
| 58 | 1 | 0 | 2.315350  | -3.971455 | -1.542866 |
| 59 | 1 | 0 | 3.212549  | -3.091284 | -2.798419 |
| 60 | 1 | 0 | 4.038905  | -4.238622 | -1.749587 |
| 61 | 6 | 0 | 1.106050  | -1.497039 | -2.071680 |

62 1 0 1.415335 -2.482201 -2.362717

-----  
2b-TS1-A-int-B-fix-up-Chloroform-yoda-NM-M

Method: opt(ts,calcfc,noeigen) b3lyp/6-31+g(d,p) freq scrf(solvent=Chloroform)  
SCF Done: E(RB3LYP) = -1461.76441419 A.U. after 1 cycles  
Lowest frequency = -28.9342

Zero-point correction= 0.500750  
(Hartree/Particle)  
Thermal correction to Energy= 0.528046  
Thermal correction to Enthalpy= 0.528991  
Thermal correction to Gibbs Free Energy= 0.443462  
Sum of electronic and zero-point Energies= -1461.263664  
Sum of electronic and thermal Energies= -1461.236368  
Sum of electronic and thermal Enthalpies= -1461.235424  
Sum of electronic and thermal Free Energies= -1461.320952

Standard orientation:

| Center<br>Number | Atomic<br>Number | Atomic<br>Type | Coordinates (Angstroms) |           |           |
|------------------|------------------|----------------|-------------------------|-----------|-----------|
|                  |                  |                | X                       | Y         | Z         |
| 1                | 6                | 0              | -0.202264               | 3.331918  | -0.805523 |
| 2                | 6                | 0              | -1.339134               | 2.910890  | -0.119699 |
| 3                | 6                | 0              | -1.491245               | 1.562239  | 0.286176  |
| 4                | 6                | 0              | -0.382036               | 0.715424  | 0.092860  |
| 5                | 6                | 0              | 0.868661                | 1.175226  | -0.391742 |
| 6                | 6                | 0              | 0.878149                | 2.462865  | -0.945109 |
| 7                | 8                | 0              | -0.529405               | -0.625481 | 0.329874  |
| 8                | 6                | 0              | 0.089253                | -1.385734 | -0.732744 |
| 9                | 6                | 0              | 1.989188                | 0.173071  | -0.447603 |
| 10               | 8                | 0              | -2.362104               | 3.807196  | 0.021501  |
| 11               | 6                | 0              | -3.241412               | 3.550896  | 1.135406  |
| 12               | 6                | 0              | -3.677967               | 2.116521  | 1.151624  |
| 13               | 6                | 0              | -2.830278               | 1.143241  | 0.764011  |
| 14               | 1                | 0              | -0.166967               | 4.338335  | -1.208880 |
| 15               | 1                | 0              | 1.738522                | 2.802037  | -1.501745 |
| 16               | 1                | 0              | -0.072559               | -2.434926 | -0.476742 |
| 17               | 1                | 0              | -0.443378               | -1.173674 | -1.673855 |
| 18               | 1                | 0              | -2.715223               | 3.828128  | 2.064259  |
| 19               | 1                | 0              | -4.083209               | 4.232667  | 1.003480  |
| 20               | 1                | 0              | -4.687463               | 1.882883  | 1.477313  |
| 21               | 6                | 0              | 3.459466                | 0.384875  | -0.198921 |
| 22               | 6                | 0              | 4.270318                | -0.806793 | 0.094288  |
| 23               | 6                | 0              | 4.169619                | 1.600786  | -0.258153 |
| 24               | 6                | 0              | 3.764907                | -1.962895 | 0.764376  |
| 25               | 6                | 0              | 5.681655                | -0.803166 | -0.167415 |
| 26               | 6                | 0              | 5.577115                | 1.572799  | -0.487508 |
| 27               | 6                | 0              | 4.552520                | -3.067468 | 1.025478  |
| 28               | 1                | 0              | 2.743913                | -1.962866 | 1.123462  |
| 29               | 6                | 0              | 6.457754                | -1.976543 | 0.046694  |
| 30               | 6                | 0              | 6.303639                | 0.413696  | -0.547548 |
| 31               | 1                | 0              | 6.078367                | 2.527092  | -0.630230 |
| 32               | 6                | 0              | 5.905343                | -3.101853 | 0.616545  |
| 33               | 1                | 0              | 4.127213                | -3.909762 | 1.563605  |
| 34               | 1                | 0              | 7.514047                | -1.947277 | -0.208348 |
| 35               | 1                | 0              | 7.364904                | 0.427703  | -0.779801 |
| 36               | 1                | 0              | 6.510344                | -3.985980 | 0.794584  |
| 37               | 6                | 0              | -3.294073               | -0.283760 | 0.769149  |



|    |   |   |           |           |           |
|----|---|---|-----------|-----------|-----------|
| 38 | 6 | 0 | -3.722301 | -0.888943 | -0.459264 |
| 39 | 6 | 0 | -3.353797 | -0.996881 | 1.961927  |
| 40 | 6 | 0 | -3.700649 | -0.194686 | -1.703988 |
| 41 | 6 | 0 | -4.197627 | -2.242522 | -0.451456 |
| 42 | 6 | 0 | -3.832558 | -2.336395 | 1.945095  |
| 43 | 6 | 0 | -4.115830 | -0.803969 | -2.870419 |
| 44 | 1 | 0 | -3.357058 | 0.833786  | -1.730687 |
| 45 | 6 | 0 | -4.620043 | -2.842651 | -1.670635 |
| 46 | 6 | 0 | -4.240047 | -2.945976 | 0.781287  |
| 47 | 1 | 0 | -3.867584 | -2.887601 | 2.881406  |
| 48 | 6 | 0 | -4.579789 | -2.143127 | -2.857697 |
| 49 | 1 | 0 | -4.089997 | -0.252351 | -3.805926 |
| 50 | 1 | 0 | -4.979948 | -3.868355 | -1.647585 |
| 51 | 1 | 0 | -4.598340 | -3.972258 | 0.792772  |
| 52 | 1 | 0 | -4.906204 | -2.611833 | -3.781542 |
| 53 | 6 | 0 | -2.904975 | -0.401370 | 3.278954  |
| 54 | 1 | 0 | -3.649891 | 0.294663  | 3.682681  |
| 55 | 1 | 0 | -2.750392 | -1.187161 | 4.023767  |
| 56 | 1 | 0 | -1.969863 | 0.156572  | 3.173789  |
| 57 | 6 | 0 | 3.637300  | 2.999803  | -0.005421 |
| 58 | 1 | 0 | 3.513488  | 3.590955  | -0.920029 |
| 59 | 1 | 0 | 2.700862  | 3.011088  | 0.546412  |
| 60 | 1 | 0 | 4.380419  | 3.526476  | 0.602937  |
| 61 | 6 | 0 | 1.549905  | -1.068159 | -0.786094 |
| 62 | 1 | 0 | 2.225473  | -1.880221 | -1.017698 |

---
